# Supplementary material for: Versatile NHC-based zinc and magnesium complexes for the synthesis and chemical recycling of aliphatic polyesters and polycarbonates
Source: Royal Society of Chemistry journal article supplement (doi:10.1039/d4cy01353k), 2024-12-10
Supplement: d4cy01353k1.pdf [file d4cy01353k1.pdf]

## SUPPORTING INFORMATION

# **Versatile NHC-based zinc and magnesium complexes for the synthesis and chemical recycling of aliphatic polyesters and polycarbonates**

Federica Tufano, Federica Santulli, Concetta Liguori, Giuseppe Santoriello, Ida Ritacco, Lucia Caporaso, Fabia Grisi, Mina Mazzeo and Marina Lamberti\*

*Department of Chemistry and Biology “Adolfo Zambelli”, University of Salerno, Via Giovanni Paolo II, 132. 84084, Fisciano (SA), Italy.*

|                                                                                                                                                                                                                        |           |
|------------------------------------------------------------------------------------------------------------------------------------------------------------------------------------------------------------------------|-----------|
| <b>General Information</b> .....                                                                                                                                                                                       | <b>6</b>  |
| <b>Synthesis of the Complexes</b> .....                                                                                                                                                                                | <b>7</b>  |
| <b>Synthesis of Zinc Complex 1a</b> .....                                                                                                                                                                              | <b>7</b>  |
| <b>Figure S1:</b> <sup>1</sup> H-NMR spectrum of complex <b>1a</b> (solvent: C <sub>6</sub> D <sub>6</sub> , 400 MHz, 298 K.).....                                                                                     | <b>7</b>  |
| <b>Synthesis of Zinc Complex 2a</b> .....                                                                                                                                                                              | <b>8</b>  |
| <b>Figure S2:</b> <sup>1</sup> H-NMR spectrum of complex <b>2a</b> . (Solvent: C <sub>6</sub> D <sub>6</sub> , 400 MHz, 298 K.).....                                                                                   | <b>8</b>  |
| <b>Synthesis of Magnesium Complex 1b</b> .....                                                                                                                                                                         | <b>9</b>  |
| <b>Figure S3:</b> <sup>1</sup> H-NMR spectrum of complex <b>1b</b> . (Solvent: C <sub>6</sub> D <sub>6</sub> , 400 MHz, 298 K.).....                                                                                   | <b>9</b>  |
| <b>Figure S4:</b> Aromatic region of the 2D-COSY spectrum of complex <b>1b</b> (Solvent: C <sub>6</sub> D <sub>6</sub> , 400 MHz, 298 K.).....                                                                         | <b>10</b> |
| <b>Figure S5:</b> Aromatic region of the 2D-NOESY spectrum of complex <b>1b</b> . (Solvent: C <sub>6</sub> D <sub>6</sub> , 400 MHz, 298 K.).....                                                                      | <b>10</b> |
| <b>Figure S6:</b> <sup>13</sup> C spectrum of complex <b>1b</b> . (Solvent: C <sub>6</sub> D <sub>6</sub> , 100,6 MHz, 298 K). .....                                                                                   | <b>11</b> |
| <b>Figure S7:</b> Aromatic region of 2D-HSQC spectrum of complex <b>1b</b> . (Solvent: C <sub>6</sub> D <sub>6</sub> , 600 MHz, 298 K.) .....                                                                          | <b>12</b> |
| <b>Synthesis of Magnesium Complex 2b</b> .....                                                                                                                                                                         | <b>13</b> |
| <b>Figure S8:</b> <sup>1</sup> H-NMR spectrum of complex <b>2b</b> . (Solvent: C <sub>6</sub> D <sub>6</sub> 400 MHz, 298 K.).....                                                                                     | <b>13</b> |
| <b>Figure S9:</b> Aromatic region of 2D-COSY spectrum of complex <b>2b</b> (Solvent: C <sub>6</sub> D <sub>6</sub> , 400 MHz, 298 K.).....                                                                             | <b>14</b> |
| <b>Figure S10:</b> Aromatic region of 2D-NOESY spectrum of complex <b>2b</b> . (Solvent: C <sub>6</sub> D <sub>6</sub> , 400 MHz, 298 K.).....                                                                         | <b>14</b> |
| <b>Figure S11:</b> <sup>13</sup> C spectrum of complex <b>2b</b> . (Solvent: C <sub>6</sub> D <sub>6</sub> , 100.6 MHz, 298 K.) .....                                                                                  | <b>15</b> |
| <b>Figure S12:</b> HSQC spectrum of complex <b>2b</b> . (Solvent: C <sub>6</sub> D <sub>6</sub> , 400 MHz, 298 K.).....                                                                                                | <b>16</b> |
| <b>DOSY-NMR experiments details</b> .....                                                                                                                                                                              | <b>17</b> |
| <b>Figure S13:</b> DOSY spectrum (THF-d <sub>8</sub> , 298 K, 400 MHz) of complex <b>1b</b> in the presence of TMSS as standard .....                                                                                  | <b>18</b> |
| <b>Figure S14:</b> DOSY spectrum (C <sub>6</sub> D <sub>6</sub> , 298 K, 400 MHz) of complex <b>1a</b> in the presence of TMSS as standard.....                                                                        | <b>18</b> |
| <b>TABLE S1:</b> Diffusion coefficients and estimated molecular mass of complex <b>1b</b> , using TMSS as internal reference species.....                                                                              | <b>18</b> |
| <b>DFT Section</b> .....                                                                                                                                                                                               | <b>19</b> |
| <b>Figure S15.</b> NBO charge values of the nitrogen atom in the produced HN(SiMe <sub>3</sub> ) <sub>2</sub> . .....                                                                                                  | <b>19</b> |
| <b>Figure S16.</b> NBO charge values of the metals in the <i>syn</i> and <i>anti</i> monomeric Zn and Mg complexes <b>1a</b> , <b>1b</b> and <b>2a</b> , <b>2b</b> , respectively.....                                 | <b>19</b> |
| <b>Scheme S1.</b> Free energy difference in THF as solvent between the <i>syn</i> Mg complex interacting with HN(SiMe <sub>3</sub> ) <sub>2</sub> and with a THF molecule (Δ <i>G</i> <sub><i>syn</i></sub> (Mg))..... | <b>20</b> |
| <b>TABLE S2:</b> XYZ Coordinates.....                                                                                                                                                                                  | <b>20</b> |
| <b>Ring-Opening Polymerization (ROP) of cyclic monomers.</b> .....                                                                                                                                                     | <b>32</b> |
| <b>Scheme S2:</b> Ring-opening polymerization (ROP) of trimethylene carbonate.....                                                                                                                                     | <b>32</b> |
| <b>TABLE S3:</b> ROP of TMC promoted by complex <b>1a</b> and <b>1b</b> , at 20°C.....                                                                                                                                 | <b>32</b> |
| <b>TABLE S4:</b> ROP of TMC promoted by complex <b>1b</b> in different solvents, at 20°C.....                                                                                                                          | <b>32</b> |

|                                                                                                                                                                                                                                                                                                          |           |
|----------------------------------------------------------------------------------------------------------------------------------------------------------------------------------------------------------------------------------------------------------------------------------------------------------|-----------|
| <b>Scheme S3:</b> Ring-opening polymerization (ROP) of lactide.....                                                                                                                                                                                                                                      | 33        |
| <b>Scheme S4:</b> Ring-opening polymerization (ROP) of $\epsilon$ -caprolactone.....                                                                                                                                                                                                                     | 33        |
| <b>TABLE S5:</b> ROP of cyclic esters and carbonates promoted by complexes <b>1a</b> , <b>1b</b> , <b>2a</b> and <b>2b</b> .....                                                                                                                                                                         | 33        |
| <b>TABLE S6:</b> ROP of LA and TMC by zinc and magnesium complexes supported by NHC-type ligands reported in the literature.....                                                                                                                                                                         | 36        |
| <b>Scheme S5</b> NHC-type zinc and magnesium complexes reported in the literature for the ROP of lactide and trimethylene carbonate.....                                                                                                                                                                 | 36        |
| <b>Figure S17:</b> $^1\text{H-NMR}$ spectrum of polytrimethylene carbonate (solvent: $\text{CDCl}_3$ , 400 MHz, 298 K). * = toluene.....                                                                                                                                                                 | 37        |
| <b>Figure S18:</b> MALDI-TOF mass spectrum (matrix DCTB) of the isolated polymer from TMC polymerization. Polymerization conditions: $[\text{TMC}]_0/[\text{BnOH}]_0/[\mathbf{1b}] = 50:1:1$ , temperature: 25 $^\circ\text{C}$ , solvent: THF.....                                                      | 37        |
| <b>Figure S19:</b> $^1\text{H-NMR}$ spectrum of polylactide (solvent: $\text{CDCl}_3$ , 600 MHz, 298 K).....                                                                                                                                                                                             | 38        |
| <b>Figure S20:</b> MALDI-TOF mass spectrum (matrix: DCTB) of the isolated polymer from L-LA polymerization (entry 2 in Table 1). Polymerization conditions: $[\text{LLA}]_0/[\text{iPrOH}]_0/[\mathbf{1b}] = 100:1:1$ , temperature: 25 $^\circ\text{C}$ , solvent: THF.....                             | 38        |
| <b>Figure S21:</b> $^1\text{H-NMR}$ spectrum of polycaprolactone (solvent: $\text{CDCl}_3$ , 400 MHz, 298 K).....                                                                                                                                                                                        | 39        |
| <b>Figure S22:</b> MALDI-TOF mass spectrum (matrix: DCTB) of the isolated polymer from $\epsilon$ -caprolactone polymerization (entry 5 in Table 1). Polymerization conditions: $[\epsilon\text{-CL}]_0/[\text{iPrOH}]_0/[\mathbf{1a}] = 100:1:1$ , temperature: 25 $^\circ\text{C}$ , solvent: THF..... | 39        |
| <b>Synthesis of alkyl substituted trimethylene carbonates .....</b>                                                                                                                                                                                                                                      | <b>40</b> |
| <b>Scheme S6:</b> Synthesis of Methyl-Trimethylene Carbonate (Me-TMC).....                                                                                                                                                                                                                               | 40        |
| <b>Scheme S7:</b> Synthesis of 2,2 Dimethyl-Trimethylene Carbonate (DTC).....                                                                                                                                                                                                                            | 40        |
| <b>Figure S23:</b> $^1\text{H-NMR}$ spectrum of the methyl-trimethylenecarbonate (solvent: $\text{CDCl}_3$ , 400 MHz, 298 K).....                                                                                                                                                                        | 41        |
| <b>Figure S24:</b> $^1\text{H-NMR}$ spectrum of the 2,2-dimethyl-trimethylenecarbonate (solvent: $\text{CDCl}_3$ , 300 MHz, 298 K).....                                                                                                                                                                  | 41        |
| <b>Ring Opening Polymerization (ROP) of alkyl substituted trimethylene carbonates .....</b>                                                                                                                                                                                                              | <b>42</b> |
| <b>Figure S25:</b> $^1\text{H-NMR}$ spectrum of poly-methyl-trimethylenecarbonate (Solvent: $\text{CDCl}_3$ , 600 MHz, 298K).....                                                                                                                                                                        | 42        |
| <b>Figure S26:</b> $^{13}\text{C-NMR}$ spectrum of poly-methyl-trimethylenecarbonate (Solvent: $\text{CDCl}_3$ , 100.6 MHz, 298K).....                                                                                                                                                                   | 43        |
| <b>Figure S27:</b> MALDI-TOF mass spectrum (matrix: DCTB) of the isolated polymer from 2,2-dimethyl-trimethylene carbonate polymerization (entry 16 in Table 1). Polymerization conditions: $[\text{Me-TMC}]_0/[\text{BnOH}]_0/[\mathbf{1b}] = 50:1:1$ , temperature: 70 $^\circ\text{C}$ .....          | 43        |
| <b>Figure S28</b> $^1\text{H-NMR}$ spectrum of poly-2,2-dimethyl-trimethylenecarbonate (Solvent: $\text{CDCl}_3$ , 600 MHz, 298 K).....                                                                                                                                                                  | 44        |
| <b>Figure S29:</b> MALDI-TOF mass spectrum (matrix: DCTB) of the isolated polymer from 2,2-dimethyl-trimethylene carbonate polymerization (entry 13 in Table 1). Polymerization conditions: $[\text{DTC}]_0/[\text{BnOH}]_0/[\mathbf{1a}] = 50:1:1$ , temperature: 160 $^\circ\text{C}$ .....            | 44        |
| <b>Mechanistic Studies via NMR analysis .....</b>                                                                                                                                                                                                                                                        | <b>45</b> |
| <b>Scheme S8:</b> Synthesis of the alcohol adduct L1HOBn from complex <b>1a</b> and <b>1b</b> .....                                                                                                                                                                                                      | 45        |

|                                                                                                                                                                                                                                                                           |           |
|---------------------------------------------------------------------------------------------------------------------------------------------------------------------------------------------------------------------------------------------------------------------------|-----------|
| <b>Figure S30:</b> <sup>1</sup> H NMR spectra of the products obtained from the reaction of complex <b>1a</b> (up spectrum) and complex <b>1b</b> (down spectrum) with one equivalent of BnOH in CD <sub>2</sub> Cl <sub>2</sub> (400 MHz, 20 °C).* = benzyl alcohol..... | 45        |
| <b>Figure S31:</b> <sup>1</sup> H NMR spectra of the products obtained from the reaction of complex <b>1a</b> (up spectrum) and complex <b>1b</b> (down spectrum) with one equivalent of BnOH in C <sub>6</sub> D <sub>6</sub> (400 MHz, 20 °C).....                      | 46        |
| <b>Figure S32:</b> <sup>1</sup> H NMR spectra of the sequential addition of one equivalent of BnOH and 15 eq of TMC to complex <b>1b</b> in THF-d <sub>8</sub> (400 MHz, 20 °C). .....                                                                                    | 47        |
| <b>Figure S33.</b> First-order kinetic plots for the consumption of TMC (left) and L-LA (right) by the catalytic systems depicted in the insets.....                                                                                                                      | 49        |
| <b>Chemical recycling of PLLA</b> .....                                                                                                                                                                                                                                   | <b>50</b> |
| <b>Methanolysis reaction performed in DCM solution</b> .....                                                                                                                                                                                                              | <b>50</b> |
| <b>Scheme S9:</b> Methanolysis reaction of PLLA in DCM solution. ....                                                                                                                                                                                                     | 50        |
| <b>Figure 34:</b> <sup>1</sup> H NMR spectrum of PLA methanolysis with assignment of internal (black triangle), chain end (blue cross and green rumble), and methyl lactate (red circle) alkyl protons. (Solvent = CD <sub>2</sub> Cl <sub>2</sub> , 400 MHz, 298 K)..... | 51        |
| <b>Methanolysis reaction performed in solvent-free conditions</b> .....                                                                                                                                                                                                   | <b>51</b> |
| <b>Scheme S10:</b> Methanolysis reaction of PLLA in solvent-free conditions.....                                                                                                                                                                                          | 51        |
| <b>Figure 35:</b> <sup>1</sup> H NMR spectrum of PLA methanolysis with assignment of internal (black triangle), and methyl lactate (red circle) alkyl protons. (Solvent = CD <sub>2</sub> Cl <sub>2</sub> , 400 MHz, 298 K).....                                          | 52        |
| <b>Synthesis of the alcoholic adduct L<sub>1</sub>HO<sup>i</sup>Pr</b> .....                                                                                                                                                                                              | <b>53</b> |
| <b>Scheme S11:</b> Synthesis of the alcohol adduct L <sub>1</sub> HO <sup>i</sup> Pr. ....                                                                                                                                                                                | 53        |
| <b>Figure 36:</b> <sup>1</sup> H NMR spectra of the alcohol adduct L <sub>1</sub> HO <sup>i</sup> Pr. (Solvent = C <sub>6</sub> D <sub>6</sub> , 400 MHz, 298 K). .....                                                                                                   | 53        |
| <b>References</b> .....                                                                                                                                                                                                                                                   | <b>55</b> |



## General Information

All the operations of synthesis and handling of air-sensitive chemicals were performed in an inert atmosphere, using Schlenk techniques and/or a glove-box in nitrogen atmosphere. The used glassware was dried in an oven at 120 °C and subsequently subjected to vacuum-nitrogen cycles. Solvents used for polymerization experiments and for the synthesis of substances instable toward air and moisture, were distilled prior to use on the opportune drying agent. In particular, THF, toluene, and benzene were dried by refluxing over sodium and benzophenone and stored under nitrogen. Dichloromethane was dried over calcium hydride and distilled prior to use. Benzyl alcohol and isopropanol were dried by refluxing over sodium. Deuterated solvents were purchased from Sigma–Aldrich and dried over activated 3-Å molecular sieves prior to use. All the reagents used for the synthesis of the complexes were purchased from Sigma Aldrich, while trimethylene carbonate was purchased from TCI. L-LA was crystallized in toluene and then dried over P<sub>2</sub>O<sub>5</sub>, ε-caprolactone was dried over CaH<sub>2</sub> and distilled under nitrogen, while TMC was purified twice by recrystallization from dry THF and stored in a glovebox before use. The NMR spectra were recorded with BRUKER AVANCE instruments operating at 600, 400 and 300 MHz for <sup>1</sup>H. Molecular masses (*M<sub>n</sub>* and *M<sub>w</sub>*) and their dispersities (*M<sub>w</sub>*/*M<sub>n</sub>*) were measured by gel permeation chromatography (GPC), using THF as the eluent (1.0 mL min<sup>-1</sup>) and narrow polystyrene standards as the reference. MALDI mass spectra were recorded using a Bruker solariX XR Fourier transform ion cyclotron resonance (FT-ICR) mass spectrometer (Bruker Daltonik GmbH, Bremen, Germany) equipped with a 7 T refrigerated actively shielded superconducting magnet (Bruker Biospin, Wissembourg, France). The samples were prepared at the concentration of 1.0 mg mL<sup>-1</sup> in THF, while the matrix (DCTB) was mixed at a concentration of 10.0 mg mL<sup>-1</sup>.

## Synthesis of the Complexes

Zinc and magnesium complexes were synthesized, according to the synthetic procedure reported in the literature,<sup>1</sup> using zinc bis [bis (trimethylsilyl) amide]  $\text{Zn}[\text{N}(\text{TMS})_2]_2$  and magnesium bis(hexamethyldisilazide)  $\text{Mg}[\text{N}(\text{TMS})_2]_2$  as metal precursor. All complexes were then characterized by NMR spectroscopy.

### Synthesis of Zinc Complex 1a

The reaction was carried out in a glove box: in a vial, 0.200 g ( $4.545 \times 10^{-4}$  mol) of NHC precursor ligand<sup>2</sup> was weighed, dissolved in 8 mL of anhydrous benzene and transferred into a 20 mL vial, equipped with a magnetic stirrer. In another vial, 0.176 g ( $4.545 \times 10^{-4}$  mol) of  $\text{Zn}[\text{N}(\text{TMS})_2]_2$  was weighed and dissolved in 8 mL of anhydrous benzene. The solution of the metal precursor was transferred to the solution of the salt and the mixture was left stirring for one hour at room temperature. The solvent was subsequently removed under reduced pressure and the complex was obtained as white powdery solid (Yield = 80%).

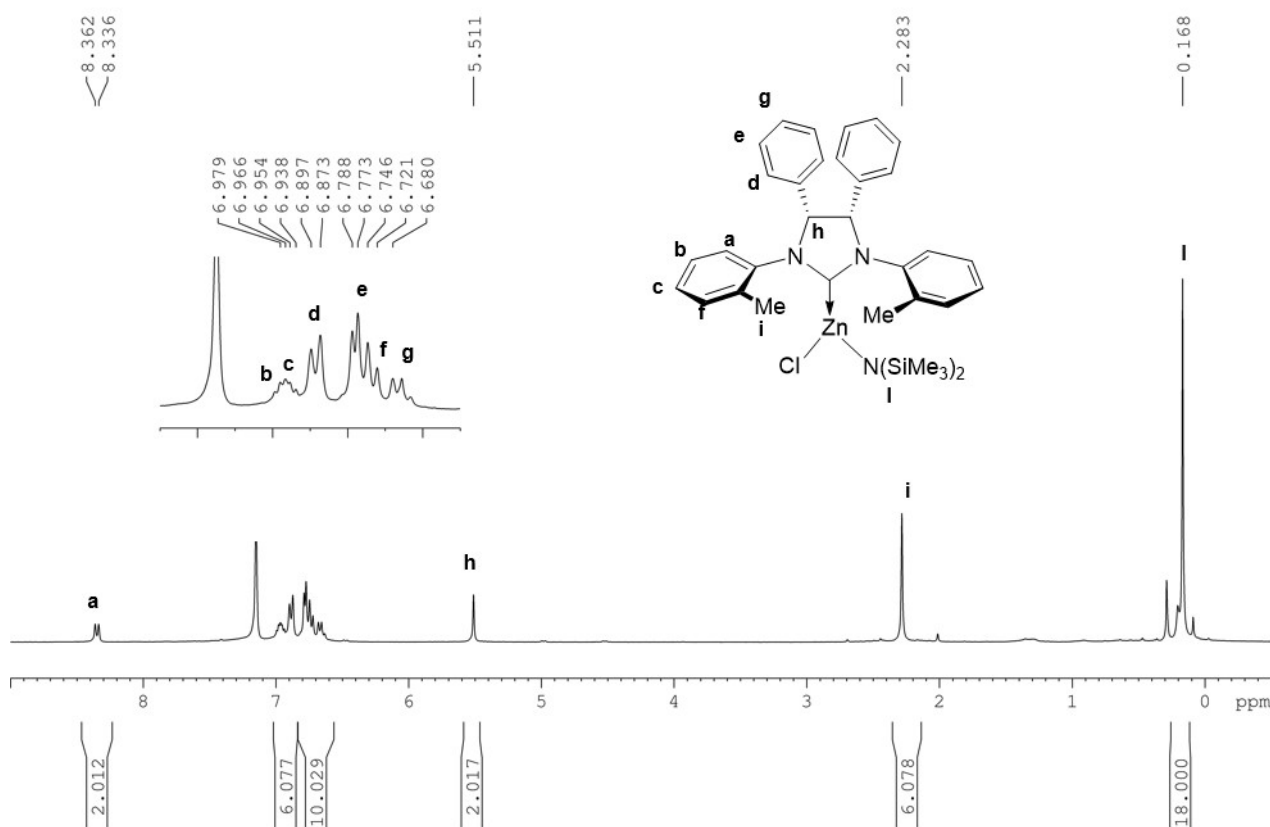

**Figure S1:** <sup>1</sup>H-NMR spectrum of complex **1a** (solvent:  $\text{C}_6\text{D}_6$ , 400 MHz, 298 K).

$^1\text{H}$  NMR (400 MHz,  $\text{C}_6\text{D}_6$ , 298 K):  $\delta$  0.17 (s, 18H,  $\text{Si}(\text{CH}_3)_3$ ), 2.28 (s, 6H,  $\text{CH}_3$ ), 5.51 (s, 2H, N-CH), 6.67 (t, 2H, Ar-H), 6.74 (d, 2H, Ar-H), 6.78 (t, 2H, Ar-H), 6.88 (d, 4H, Ar-H), 6.95 (t, 2H, Ar-H), 6.97 (t, 2H, Ar-H), 8.35 (d, 2H, Ar-H).

### Synthesis of Zinc Complex **2a**

The reaction carried out in a glove box: in a vial, 0.200 g ( $4.545 \times 10^{-4}$  mol) of NHC precursor ligand<sup>3</sup> was weighed, dissolved in 8 mL of anhydrous benzene and transferred into a 20 mL vial, equipped with a magnetic stirrer. In another vial, 0.176 g ( $4.545 \times 10^{-4}$  mol) of  $\text{Zn}[\text{N}(\text{TMS})_2]_2$  was weighed and dissolved in 8 mL of anhydrous benzene. The solution of the metal precursor was transferred to the solution of the salt and the mixture was left stirring for one hour at room temperature. The solvent was subsequently removed under reduced pressure and the complex obtained was a white powdery solid (Yield = 85%).

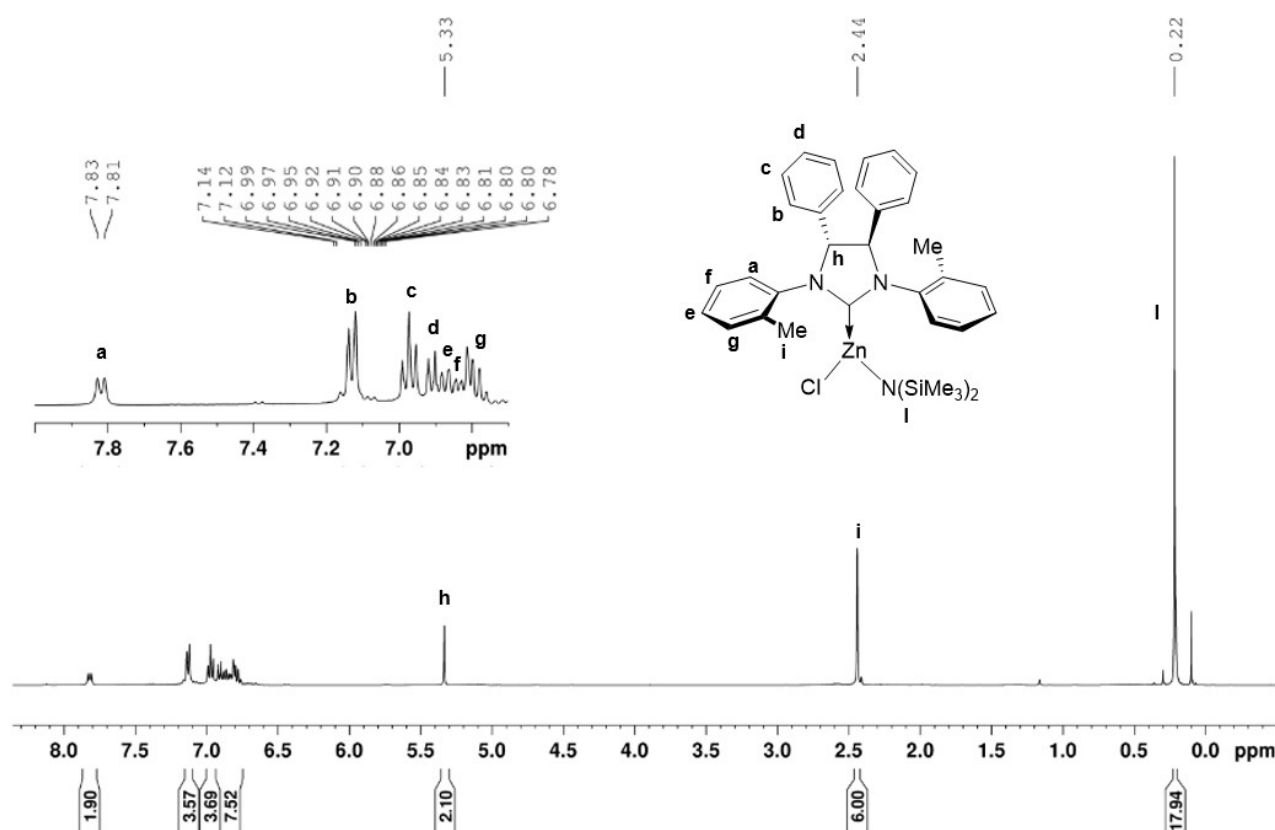

**Figure S2:**  $^1\text{H}$ -NMR spectrum of complex **2a**. (Solvent:  $\text{C}_6\text{D}_6$ , 400 MHz, 298 K.)

$^1\text{H}$  NMR (400 MHz,  $\text{C}_6\text{D}_6$ , 298 K):  $\delta$  0.22 (s, 18H,  $\text{Si}(\text{CH}_3)_3$ ), 2.44 (s, 6H,  $\text{CH}_3$ ), 5.33 (s, 2H, N-CH), 6.79 (d, 2H, Ar-H), 6.81 (t, 2H, Ar-H), 6.86 (tr, 2H, Ar-H), 6.91 (t, 2H, Ar-H), 6.97 (t, 4H, Ar-H), 7.13 (d, 4H, Ar-H), 7.82 (d, 2H, Ar-H).



## Synthesis of Magnesium Complex **1b**

The reaction was carried out in a glove box: in a vial, 0.100 g ( $2.273 \times 10^{-4}$  mol) of NHC precursor ligand was weighed, dissolved in 4 mL of anhydrous benzene and transferred into a 20 mL vial, equipped with a magnetic stirrer. In another vial, 0.0784 g ( $2.273 \times 10^{-4}$  mol) of  $\text{Mg}[\text{N}(\text{TMS})_2]_2$  was weighed and dissolved in 4 mL of anhydrous benzene. The solution of the metal precursor was transferred to the solution of the salt and the mixture was left stirring for 30 minutes at room temperature. The solvent was subsequently removed under reduced pressure and the complex obtained was a white powdery solid (Yield = 85%).

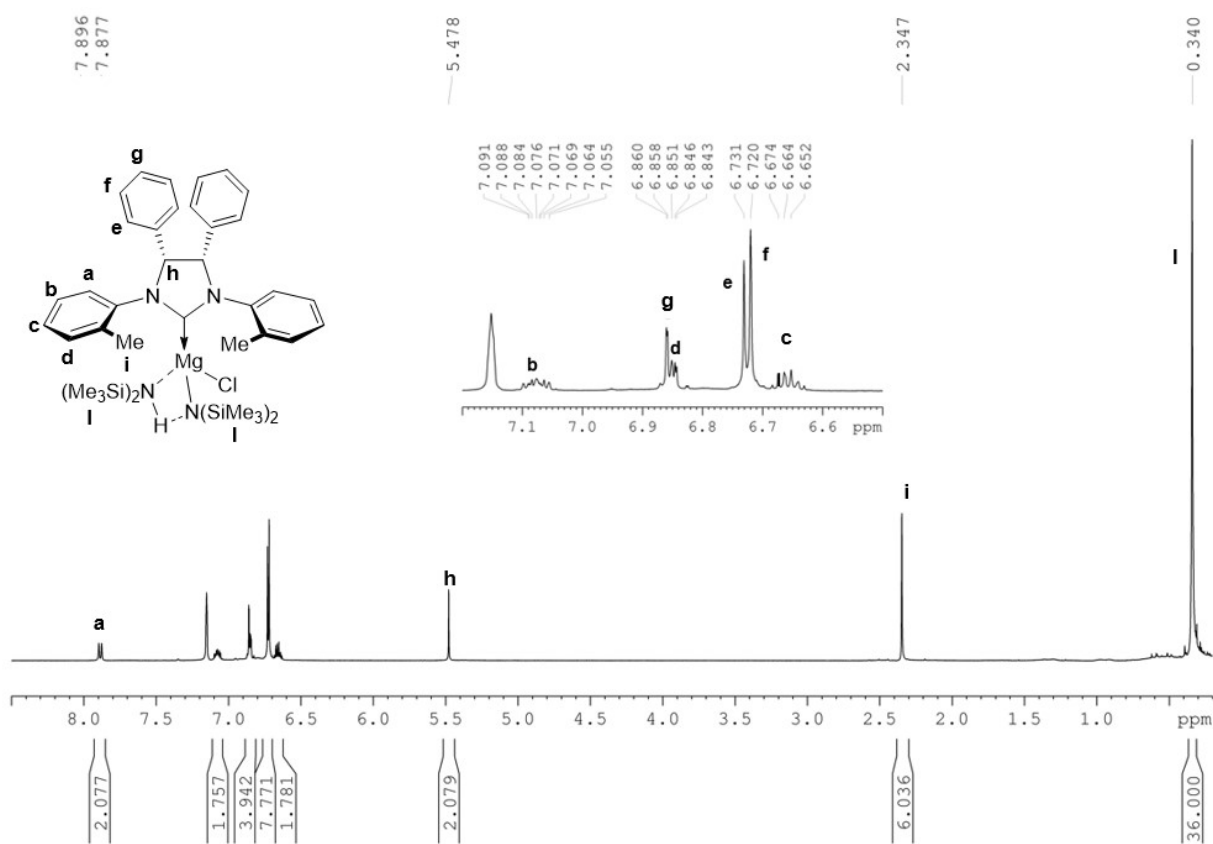

**Figure S3:**  $^1\text{H}$ -NMR spectrum of complex **1b**. (Solvent:  $\text{C}_6\text{D}_6$ , 400 MHz, 298 K.)

$^1\text{H}$  NMR (400 MHz,  $\text{C}_6\text{D}_6$ , 298 K):  $\delta$  0.34 (s, 36H,  $\text{Si}(\text{CH}_3)_3$ ), 2.35 (s, 6H, CH<sub>3</sub>), 5.48 (s, 2H, N-CH), 6.66 (t, 2H, Ar-H), 6.72 (t, 4H, Ar-H), 6.73 (d, 4H, Ar-H), 6.84 (d, 2H, Ar-H), 6.86 (d, 2H, Ar-H), 7.07 (m, 2H, Ar-H), 7.88 (d, 2H, Ar-H).

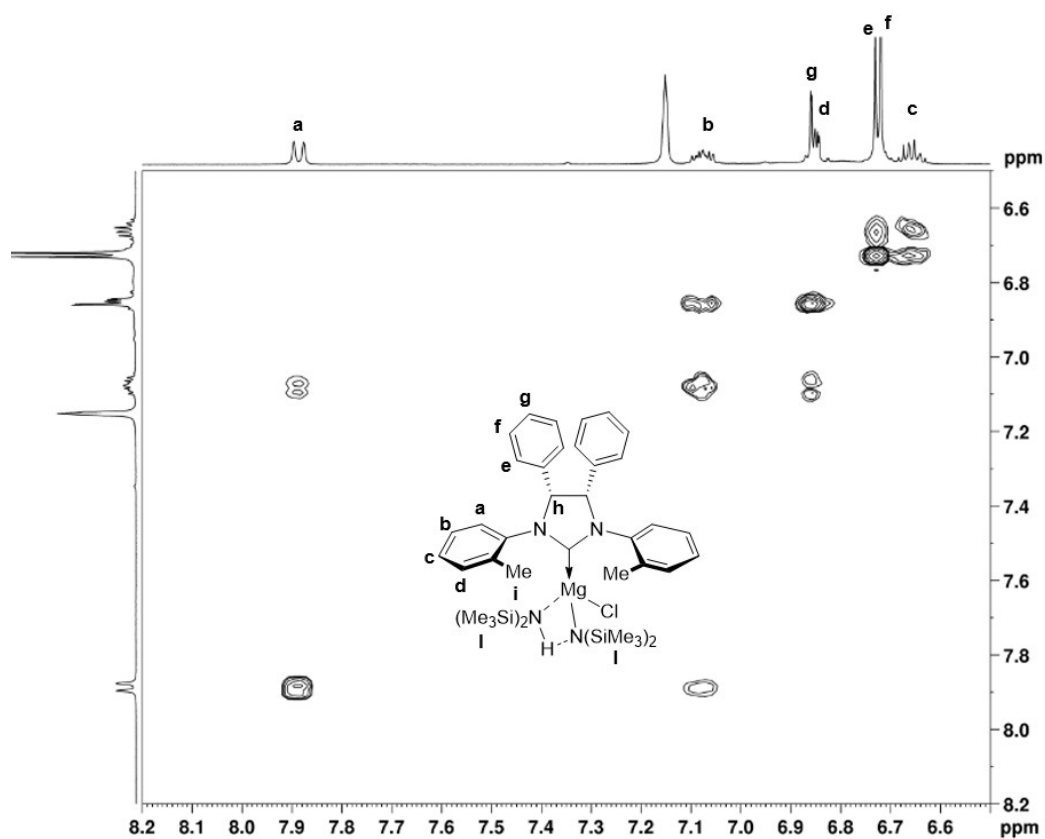

**Figure S4:** Aromatic region of the 2D-COSY spectrum of complex **1b** (Solvent: C<sub>6</sub>D<sub>6</sub>, 400 MHz, 298 K.)

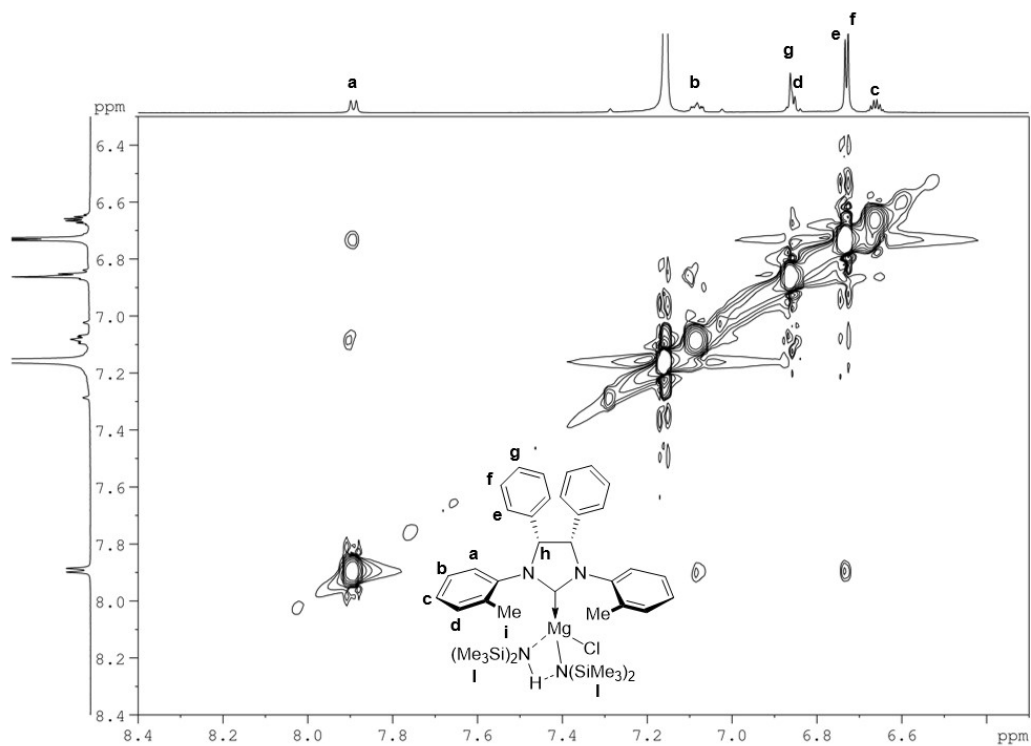

**Figure S5:** Aromatic region of the 2D-NOESY spectrum of complex **1b**. (Solvent: C<sub>6</sub>D<sub>6</sub>, 400 MHz, 298 K.)

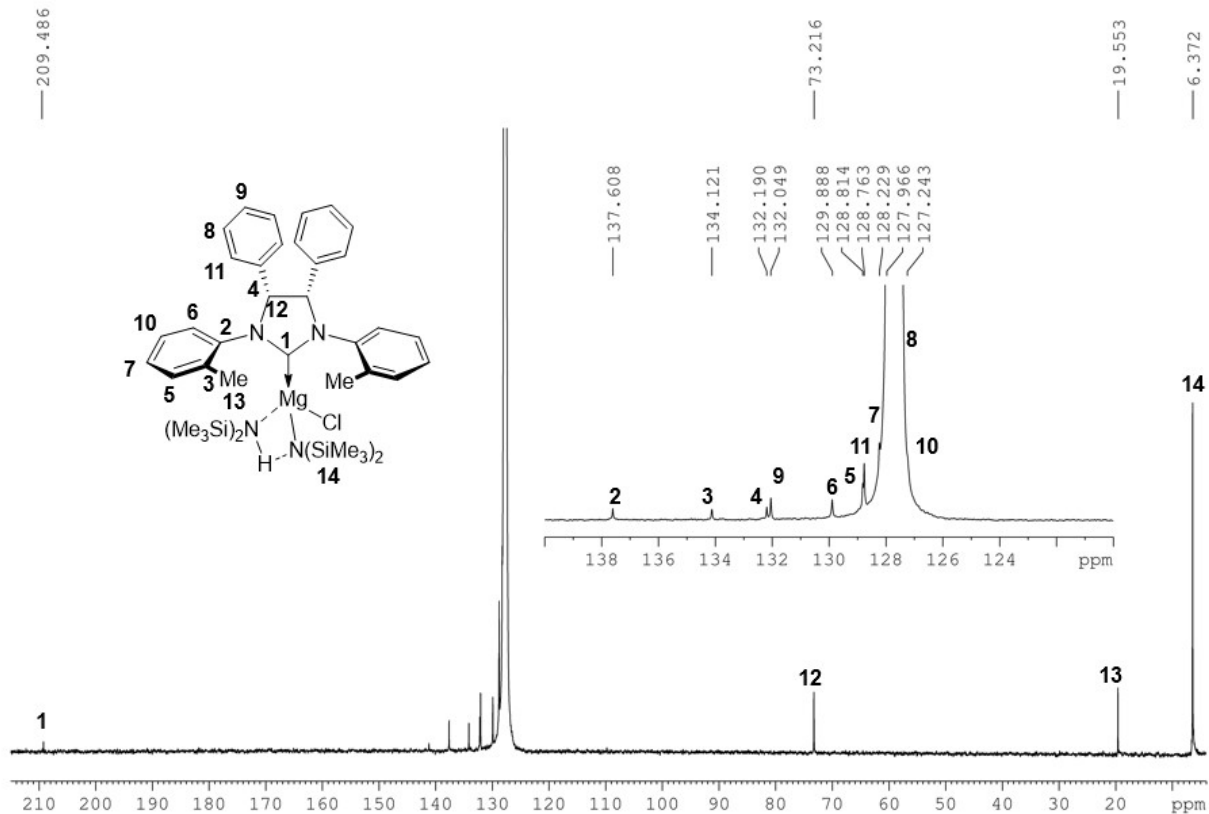

**Figure S6:** <sup>13</sup>C spectrum of complex **1b**. (Solvent: C<sub>6</sub>D<sub>6</sub>, 100,6 MHz, 298 K).

<sup>13</sup>C NMR (100.6 MHz, C<sub>6</sub>D<sub>6</sub>, 298 K): δ 6.37 (Si(CH<sub>3</sub>)<sub>3</sub>), 19.55 (2 CH<sub>3</sub>), 73.22 (2 CH), 127.24 (2 CH) 127.97 (2 CH), 128.23 (2 CH) 128.76 (2 CH), 128.81 (2 CH), 129.89 (2 CH), 132.05 (2 CH), 132.19 (2 Cq), 134.12 (2 Cq), 137.61 (2 CqN), 209.49 (C Carbenic).

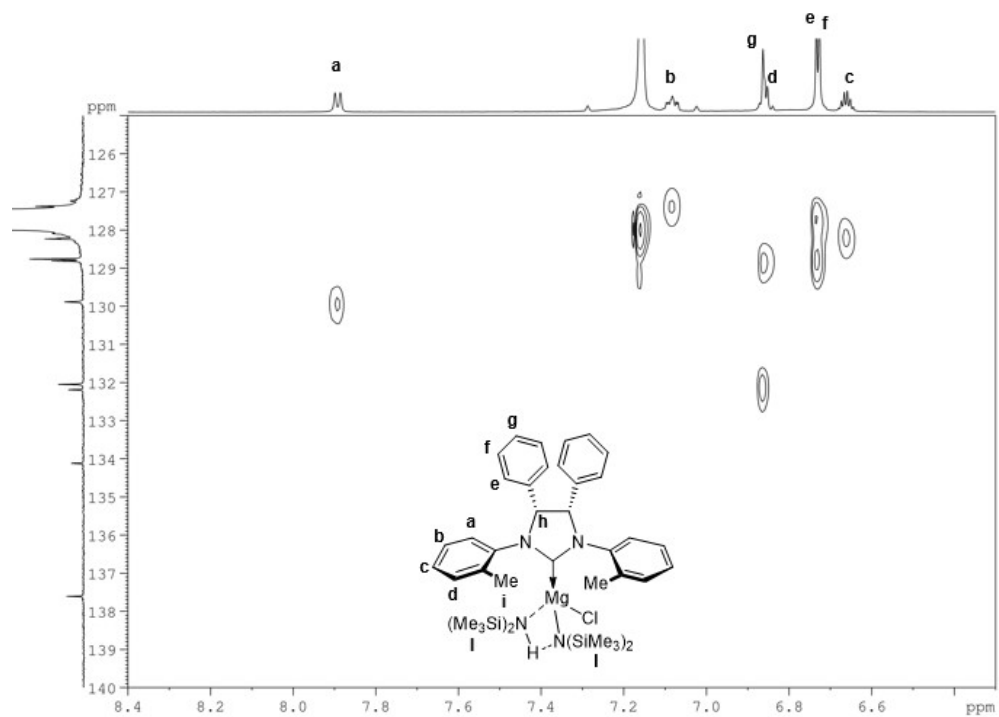

**Figure S7:** Aromatic region of 2D-HSQC spectrum of complex **1b**. (Solvent:  $\text{C}_6\text{D}_6$ , 600 MHz, 298 K.)

## Synthesis of Magnesium Complex 2b

The reaction was carried out in a glove box: in a vial, 0.100 g ( $2.273 \times 10^{-4}$  mol) of NHC precursor ligand was weighed, dissolved in 4 mL of anhydrous benzene and transferred into a 20 mL vial, equipped with a magnetic stirrer. In another vial, 0.0784 g ( $2.273 \times 10^{-4}$  mol) of  $\text{Mg}[\text{N}(\text{SiMe}_3)_2]_2$  was weighed and dissolved in 4 mL of anhydrous benzene. The solution of the metal precursor was transferred to the solution of the salt and the mixture was left stirring for 30 minutes at room temperature. The solvent was subsequently removed under reduced pressure and the complex obtained was a yellow powdery solid (Yield = 80%).

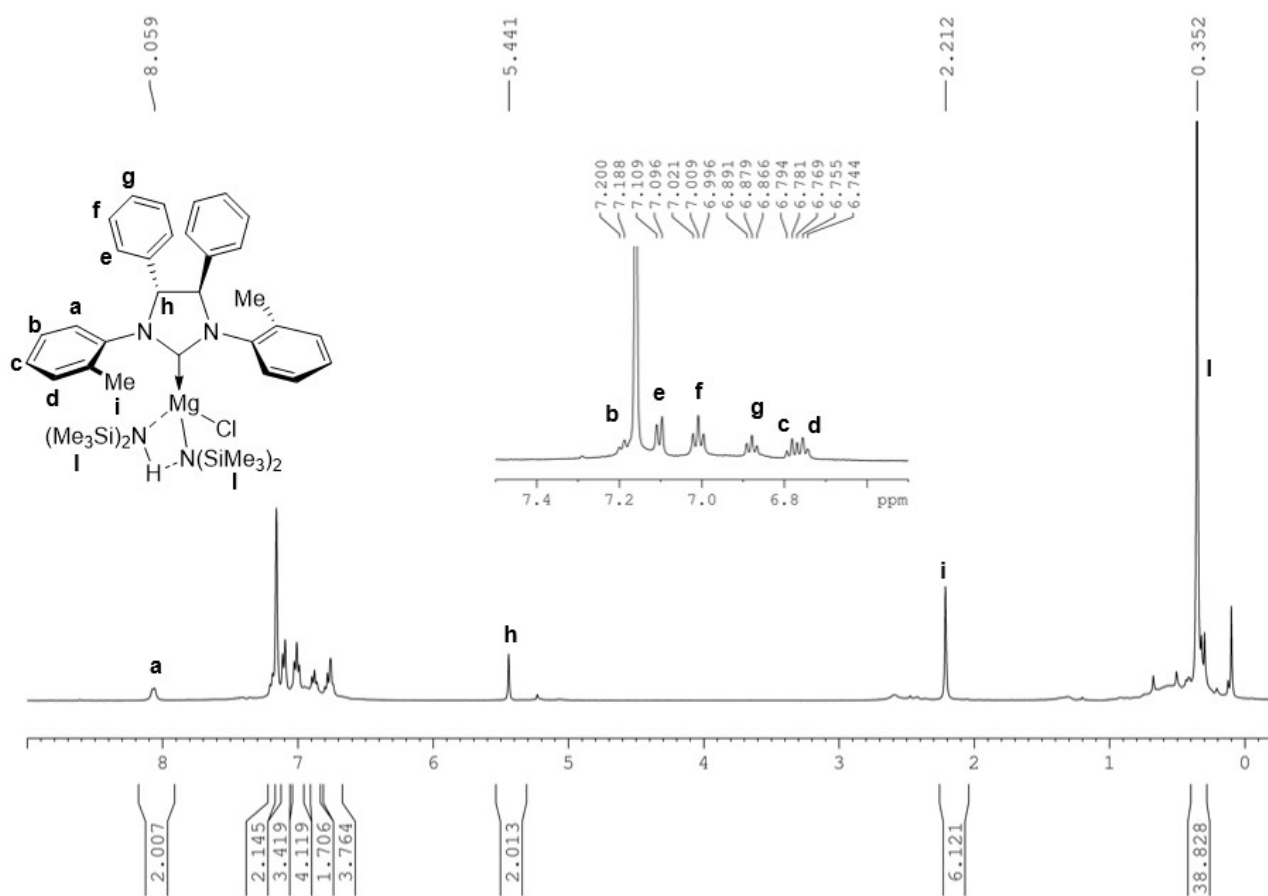

**Figure S8:**  $^1\text{H}$ -NMR spectrum of complex **2b**. (Solvent:  $\text{C}_6\text{D}_6$  400 MHz, 298 K.)

$^1\text{H}$  NMR (400 MHz,  $\text{C}_6\text{D}_6$ , 298 K):  $\delta$  0.35 (s, 36H,  $\text{Si}(\text{CH}_3)_3$ ), 2.21 (s, 6H,  $\text{CH}_3$ ), 5.44 (s, 2H, N-CH), 6.76 (d, 2H, Ar-H), 6.80 (t, 2H, Ar-H), 6.88 (t, 2H, Ar-H), 7.01 (t, 4H, Ar-H), 7.10 (d, 4H, Ar-H), 7.19 (d, 2H, Ar-H), 8.06 (d, 2H, Ar-H).

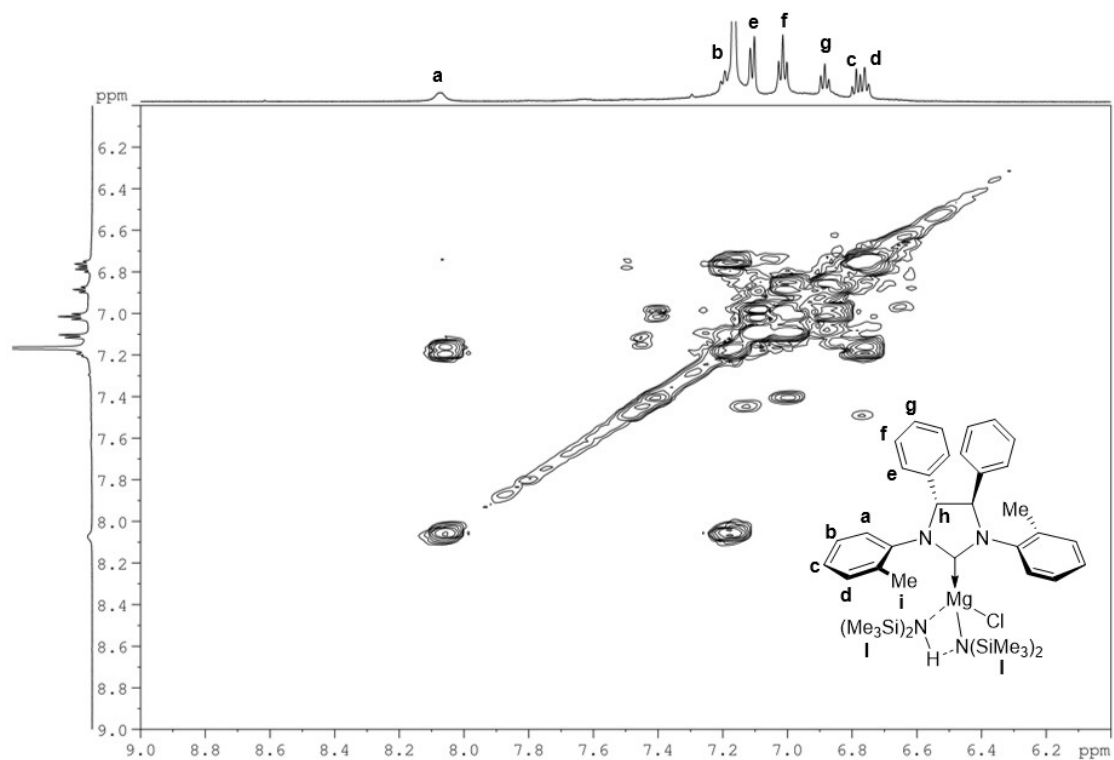

**Figure S9:** Aromatic region of 2D-COSY spectrum of complex **2b** (Solvent:  $C_6D_6$ , 400 MHz, 298 K.)

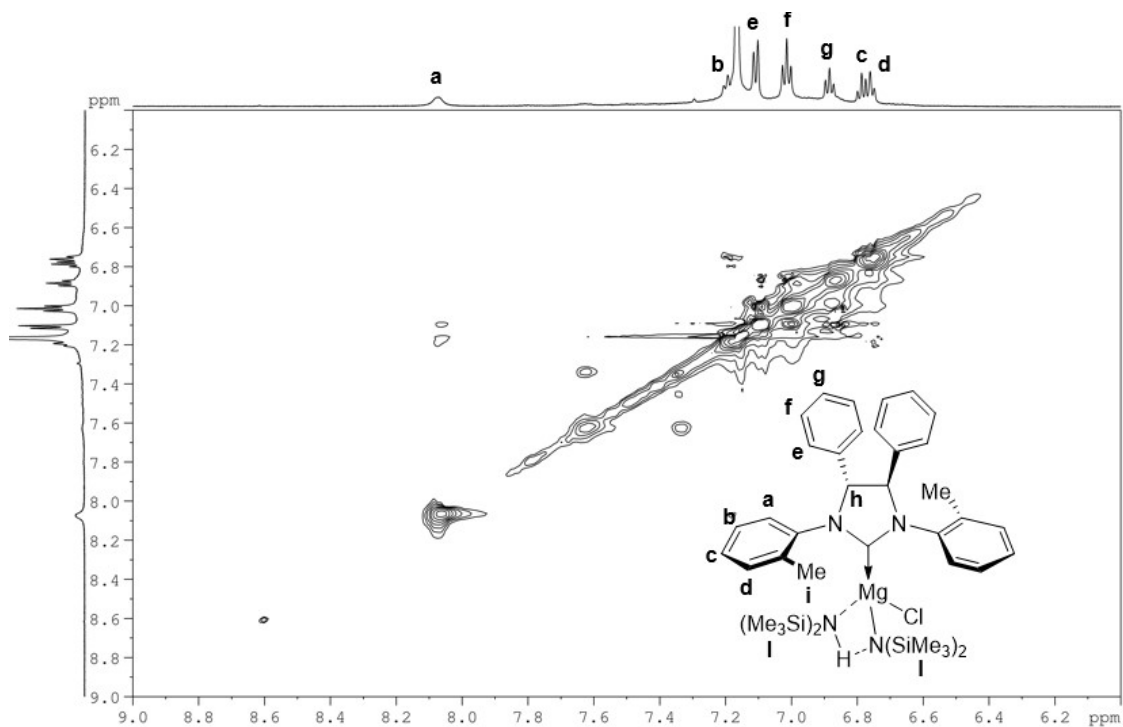

**Figure S10:** Aromatic region of 2D-NOESY spectrum of complex **2b**. (Solvent:  $C_6D_6$ , 400 MHz, 298 K.)

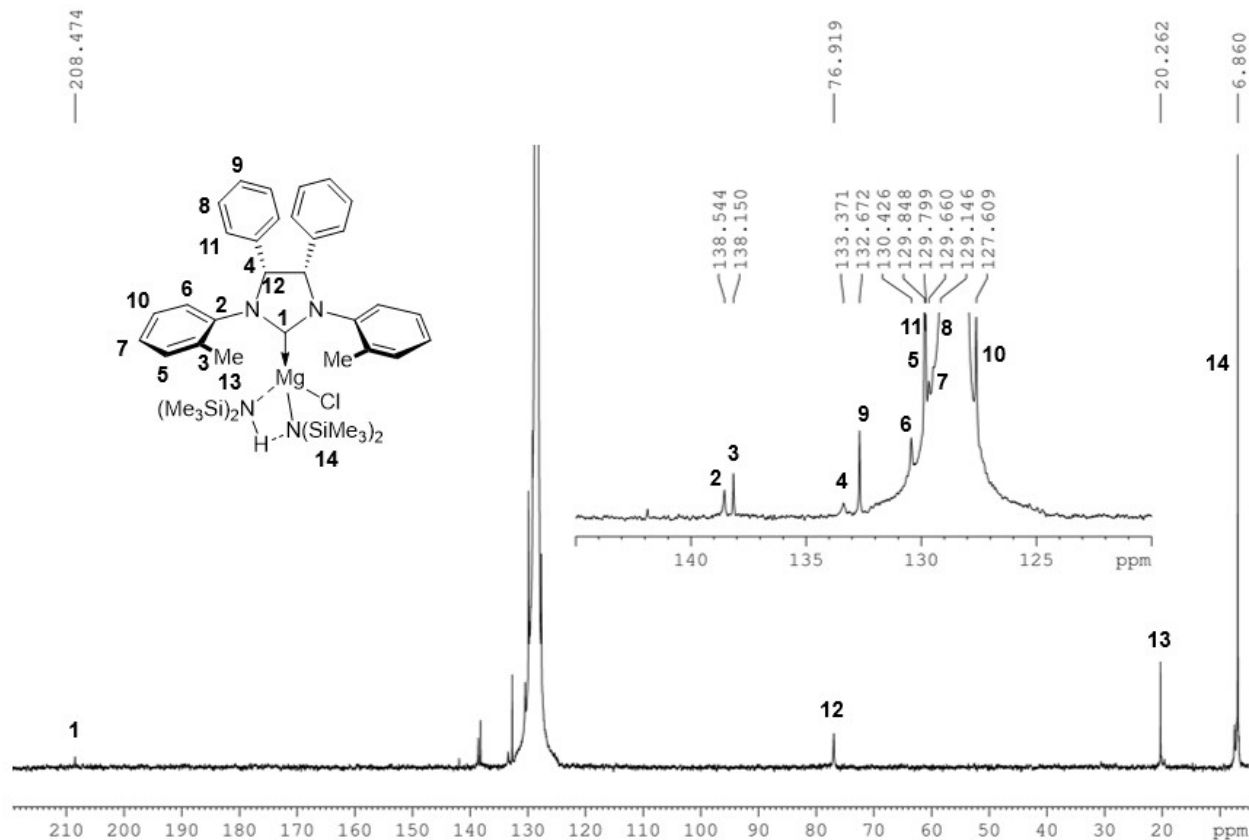

**Figure S11:**  $^{13}\text{C}$  spectrum of complex **2b**. (Solvent:  $\text{C}_6\text{D}_6$ , 100.6 MHz, 298 K.)

$^{13}\text{C}$  NMR (100.6 MHz,  $\text{C}_6\text{D}_6$ , 298 K):  $\delta$  6.86 (Si(CH<sub>3</sub>)<sub>3</sub>), 20.26 (2 CH<sub>3</sub>), 76.92 (2 CH), 127.61 (2 CH) 129.15 (2 CH), 129.66 (2 CH), 129.80 (2 CH), 129.85 (2 CH), 130.43 (2 CH), 132.67 (2 CH), 133.37 (2 Cq), 138.15 (2 Cq), 138.54 (2 CqN), 208.45 (C Carbenic).

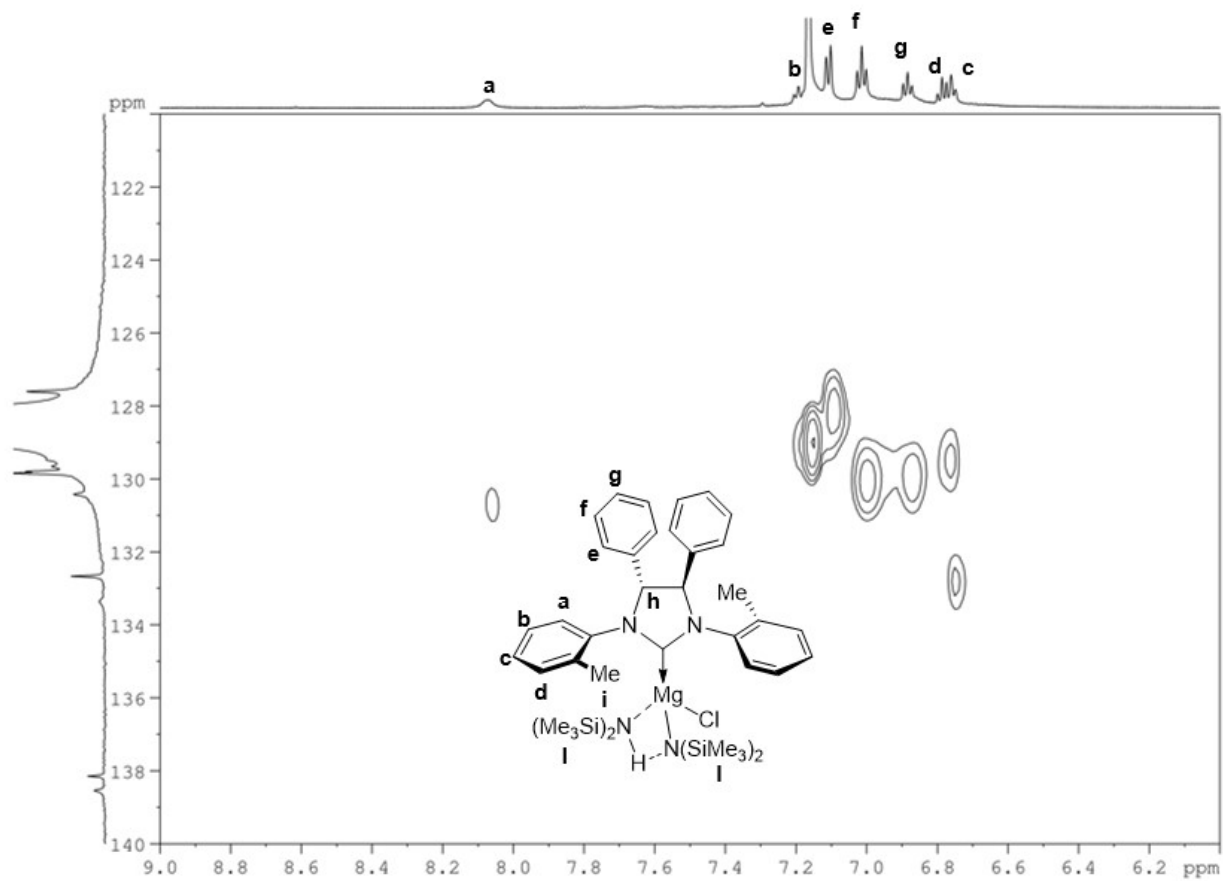

**Figure S12:** HSQC spectrum of complex **2b**. (Solvent: C<sub>6</sub>D<sub>6</sub>, 400 MHz, 298 K.)



## DOSY-NMR experiments details

A measurement of diffusion has been carried out by observing the attenuation of the NMR signals during a pulsed field gradient experiment using the double stimulated echo pulse sequence. In particular, 2D DOSY PGSE NMR spectra were performed on a Bruker Avance 600 spectrometer at 298 K without spinning. Tetrakis(trimethylsilyl)silane (TMSS) was added as the internal standard. The dependence of the resonance intensity (I) on the gradient strength (G) is described by the following equation:

$$I(G) = I_0 \exp \{ - D \gamma^2 G^2 \delta^2 (\Delta - \delta/3) \}$$

where I is the observed intensity (attenuated signal intensity),  $I_0$  is the reference intensity unattenuated signal intensity), D is the diffusion coefficient,  $\gamma$  is the nucleus gyromagnetic ratio, G is the gradient strength,  $\delta$  is the gradient duration, and  $\Delta$  is the diffusion delay. The parameters  $\delta$  and  $\Delta$  were kept constant during the experiments (1800  $\mu$ s and 0.15 s, respectively) whereas G varied from 5 to 95% in 100 steps. A nonlinear regression on I and  $G^2$  data gave the coefficients D for the samples and the corresponding internal standard signals ( $D_{\text{sample}}$  and  $D_{\text{TMSS}}$ , respectively). The molecular masses in solution (MM) were simply estimated using Graham's law of diffusion:  $D = K(T/\text{MM})^{1/2}$ , where the constant K depends on geometric factor. By assuming the same K for both species in solution and a constant temperature, the relative diffusion rate of the sample and the TMSS is given by

$$D_{\text{sample}}/D_{\text{TMSS}} = (\text{MM}_{\text{TMSS}}/\text{MM}_{\text{sample}})^{1/2}$$

This allows the calculation of an unknown molecular mass. This method is useful when a highly accurate value is not required for the molecular mass.

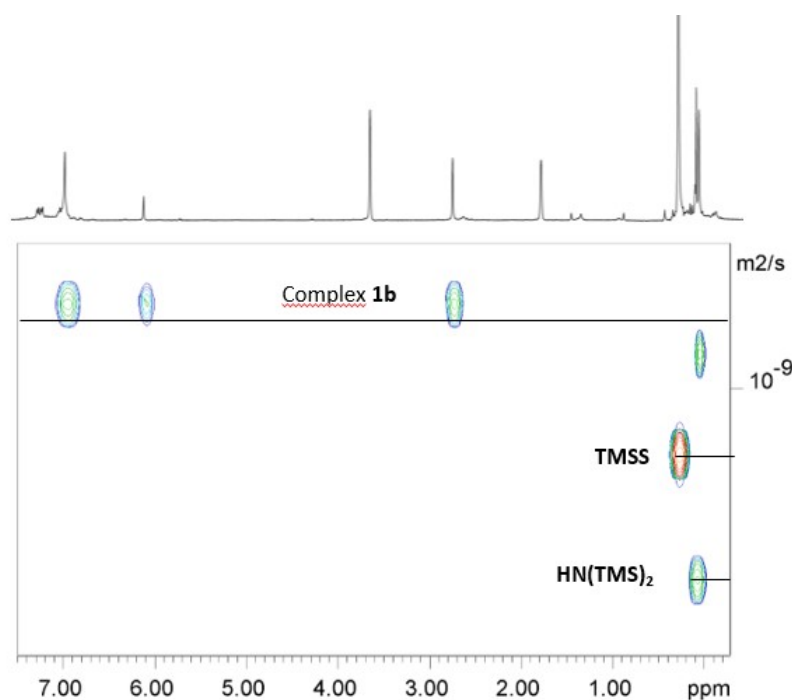

**Figure S13:** DOSY spectrum (THF-d8, 298 K, 400 MHz) of complex **1b** ( $D = 8.8 \cdot 10^{-10} \text{ m}^2/\text{s}$ ) in the presence of TMSS as standard ( $D = 1.10 \cdot 10^{-9} \text{ m}^2/\text{s}$ ), with the formation of free amine  $\text{HN}(\text{TMS})_2$  ( $D = 1.42 \cdot 10^{-9} \text{ m}^2/\text{s}$ ).

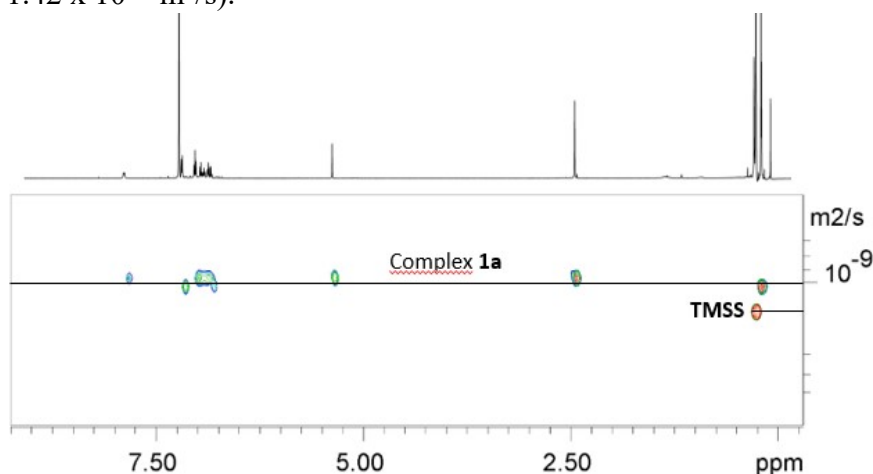

**Figure S14:** DOSY spectrum ( $\text{C}_6\text{D}_6$ , 298 K, 400 MHz) of complex **1a** ( $D = 9.9 \cdot 10^{-10} \text{ m}^2/\text{s}$ ) in the presence of TMSS as standard ( $D = 1.3 \cdot 10^{-9} \text{ m}^2/\text{s}$ ).

**TABLE S1:** Diffusion coefficients and estimated molecular mass of complex **1b**, using TMSS as internal reference species

| Complex               | $D_{\text{Sample}}$<br>( $\times 10^{-10} \text{ m}^2/\text{s}$ ) | $D_{\text{TMSS}}$<br>( $\times 10^{-10} \text{ m}^2/\text{s}$ ) | $\text{MM}^{\text{est}}$<br>(Da) | FW<br>(Da) | $\text{FW}_{\text{amine}}$<br>(Da) | $\text{FW}_{\text{THF}}$<br>(Da) | $\text{FW}_2$<br>(Da) |
|-----------------------|-------------------------------------------------------------------|-----------------------------------------------------------------|----------------------------------|------------|------------------------------------|----------------------------------|-----------------------|
| <b><sup>a</sup>1b</b> | 5.4                                                               | 9.3                                                             | 886                              | 624        | <b>786</b>                         | -                                | 1410                  |
| <b><sup>b</sup>1b</b> | 8.8                                                               | 11                                                              | 605                              | 624        | 786                                | <b>696</b>                       | 1410                  |
| <b><sup>a</sup>1a</b> | 9.9                                                               | 13                                                              | 553                              | <b>665</b> | 827                                | -                                | 1330                  |

<sup>a</sup> $\text{C}_6\text{D}_6$  at 298 K. <sup>b</sup>THF-d8 at 298 K.  $\text{MM}^{\text{est}}$  = estimated molecular mass, FW = formula weight.

## DFT Section

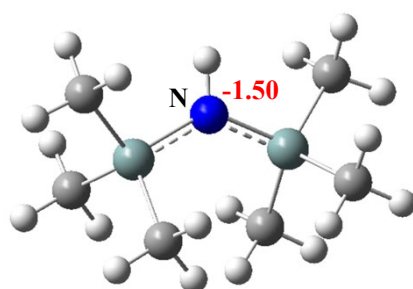

**Figure S15.** NBO charge values of the nitrogen atom in the produced HN(SiMe<sub>3</sub>)<sub>2</sub>. The structures are represented in balls and sticks. C, H, N and Si, are depicted in gray, white, blue and light green, respectively. The NBO charge values of the metals are in red.

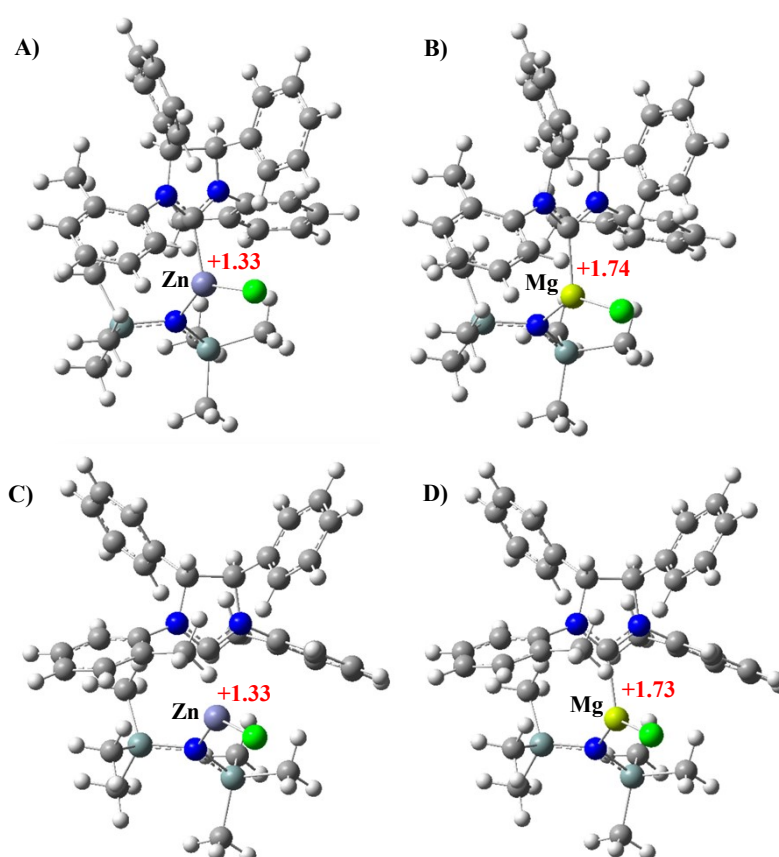

**Figure S16.** NBO charge values of the metals in the *syn* and *anti* monomeric Zn and Mg complexes **1a**, **1b** (panel A and B) and **2a**, **2b** (panel C and D), respectively. The structures are represented in balls and sticks. C, H, N, Si, Cl, Zn and Mg are depicted in grey, white, blue, light green, green, light purple and yellow, respectively. The NBO charge values of the metals are in red.

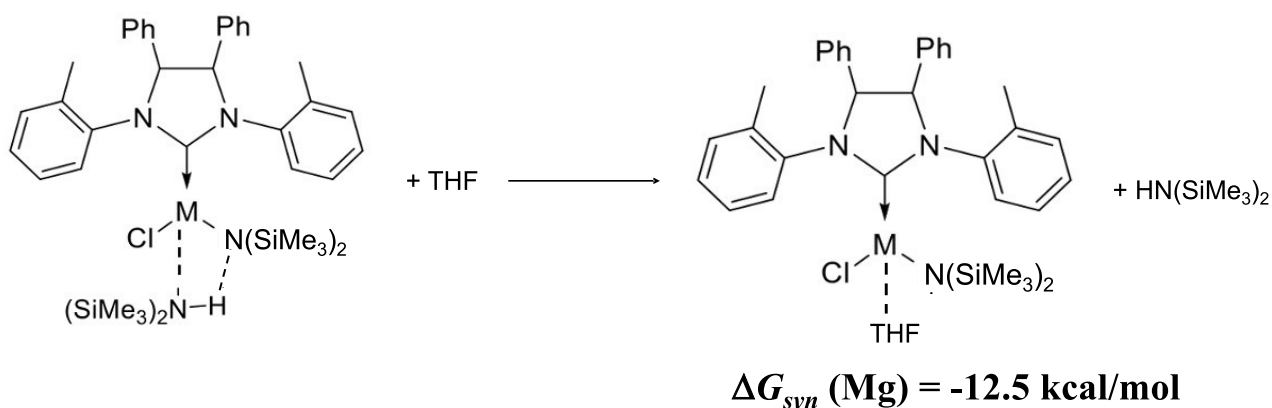

**Scheme S1.** Free energy difference in THF as solvent between the *syn* Mg complex interacting with  $\text{HN}(\text{SiMe}_3)_2$  and with a THF molecule ( $\Delta G_{syn} (\text{Mg})$ ).

**TABLE S2:** XYZ Coordinates.

| LiHCl                                  | Zn[N(SiMe <sub>3</sub> ) <sub>2</sub> ] <sub>2</sub> | Mg[N(SiMe <sub>3</sub> ) <sub>2</sub> ] <sub>2</sub> |
|----------------------------------------|------------------------------------------------------|------------------------------------------------------|
| Cl -1.51711500 -1.66096400 -2.51930900 | Zn 0.00000000 0.00005400 0.00001100                  | Mg 0.00002100 0.00637100 0.00213700                  |
| C 0.77851900 0.18855900 1.26206500     | Si 2.65868800 1.38412900 -0.71153000                 | N 1.92695100 0.00286700 0.00317900                   |
| C -0.63137100 0.84340200 1.05795600    | Si 2.65858900 -1.38413700 0.71156500                 | Si 2.65361500 1.26126800 -0.91962900                 |
| C -0.65329100 -1.30689800 0.24684600   | C 1.35623600 2.28925500 -1.74610500                  | Si 2.65055800 -1.26011400 0.92229000                 |
| N 0.63013400 -1.06861500 0.48092800    | H 0.94274100 1.64365800 -2.52772400                  | C 1.23767200 2.09242200 -1.88070300                  |
| N -1.45297500 -0.34675500 0.70525900   | H 0.52284000 2.66004000 -1.13779900                  | H 0.73496100 1.39398900 -2.56022600                  |
| C 1.70946700 -1.87575900 -0.01219400   | H 1.78904200 3.16321600 -2.24205900                  | H 0.47832500 2.53180500 -1.22020300                  |
| C 1.72296300 -2.18647900 -1.37150700   | C 4.09237800 0.89337100 -1.83251100                  | H 1.60921800 2.91560600 -2.49789100                  |
| C 2.71332400 -2.32521000 0.85814600    | H 4.54114200 1.77257100 -2.30492900                  | C 3.92927100 0.63198600 -2.15673200                  |
| C 2.76281300 -2.94938400 -1.88903600   | H 4.88169900 0.38414500 -1.27186200                  | H 4.31250300 1.44175900 -2.78527100                  |
| H 0.90512400 -1.85169800 -2.00421200   | H 3.75714800 0.21698900 -2.62347200                  | H 4.78430400 0.18293300 -1.64218700                  |
| C 3.75481000 -3.07141600 0.30195300    | C 3.29453400 2.58424000 0.59591200                   | H 3.49878600 -0.13231000 -2.80964500                 |
| C 3.78887100 -3.38012100 -1.05412900   | H 4.05583400 2.11528600 1.22495000                   | C 3.46577200 2.57792000 0.15885200                   |
| H 2.76592600 -3.19684500 -2.94338000   | H 3.73747200 3.47664500 0.14233700                   | H 4.28903900 2.15389600 0.74054200                   |
| H 4.54267900 -3.42988600 0.95512300    | H 2.48059600 2.90877900 1.25130800                   | H 3.86857700 3.40158700 -0.43898000                  |
| H 4.60838200 -3.96693100 -1.45217600   | C 4.09255400 -0.89356300 1.83227200                  | H 2.74543500 2.99542300 0.86873000                   |
| C -2.88022100 -0.33451000 0.71222700   | H 4.54122600 -1.77282100 2.30467100                  | C 3.93808500 -0.63870700 2.15104300                  |
| C -3.51462100 0.91112500 0.76927500    | H 4.88188000 -0.38452800 1.27145700                  | H 4.31975700 -1.45074900 2.77760100                  |
| C -3.64387800 -1.51954200 0.72610100   | H 3.75758800 -0.21706700 2.62324700                  | H 4.79292000 -0.19570100 1.63095300                  |
| C -4.89821200 1.00498000 0.81207300    | C 1.35617000 -2.28902100 1.74639100                  | H 3.51681700 0.12875300 2.80624800                   |
| C -5.03432100 -1.38553300 0.76350500   | H 0.52262200 -2.65971800 1.13823800                  | C 1.23561200 -2.08212600 1.89225500                  |
| C -5.66818700 -0.15064800 0.80230500   | H 1.78892800 -3.16302100 2.24232000                  | H 0.46795100 -2.51465200 1.23687700                  |
| H -5.36439800 1.98210500 0.84313700    | H 0.94289300 -1.64331900 2.52803700                  | H 1.60548800 -2.90894600 2.50558300                  |
| H -5.63057700 -2.29068300 0.76521200   | C 3.29402400 -2.58440300 -0.59593800                 | H 0.74333100 -1.38046300 2.57596500                  |
| H -6.74963300 -0.09503000 0.82814100   | H 4.05524600 -2.11556700 -1.22516000                 | C 3.44767700 -2.58188300 -0.16126000                 |
| C 2.68448600 -2.06224000 2.34109800    | H 3.73695900 -3.47683400 -0.14240700                 | H 4.26955200 -2.16290500 -0.74855100                 |
| H 2.99286000 -1.03929200 2.57508600    | H 2.47991800 -2.90889000 -1.25115000                 | H 3.84951600 -3.40783700 0.43406300                  |
| H 1.68522000 -2.21757400 2.75605400    | N -1.89528300 0.00002700 -0.00003100                 | H 2.72018100 -2.99525400 -0.86625800                 |
| H 3.36769700 -2.73750100 2.85731800    | Si -2.65859700 -1.38413500 -0.71156600               | N -1.92689900 0.00116000 -0.00063700                 |

|                                       |                                       |                                        |
|---------------------------------------|---------------------------------------|----------------------------------------|
| H -2.92960700 1.81744000 0.74654100   | Si -2.65868000 1.38413100 0.71152900  | Si -2.64768500 -1.26159500 -0.92225900 |
| C -3.07008000 -2.91262900 0.70178400  | C -1.35613400 -2.28910500 -1.74626200 | Si -2.65646500 1.25965300 0.91976900   |
| H -2.73078500 -3.17398500 -0.30532200 | H -0.94273900 -1.64343500 -2.52787300 | C -1.22932700 -2.08470500 -1.88638700  |
| H -2.23313400 -3.03074400 1.39665600  | H -0.52267000 -2.65984700 -1.13802300 | H -0.73282600 -1.38345100 -2.56750000  |
| H -3.83800100 -3.63030700 0.99124500  | H -1.78889500 -3.16308000 -2.24223100 | H -0.46535700 -2.51877000 -1.22775600  |
| H -0.97971800 1.24547400 2.00896100   | C -4.09245000 -0.89352300 -1.83240100 | H -1.59758900 -2.91054800 -2.50199800  |
| H 0.87384900 -0.08430600 2.31543000   | H -4.54114900 -1.77277000 -2.30479100 | C -3.92977300 -0.63953600 -2.15637300  |
| C -0.65565900 1.92240200 -0.00281600  | H -4.88178000 -0.38440700 -1.27166400 | H -4.30957600 -1.45140600 -2.78428900  |
| C -0.34077200 3.22876700 0.37719900   | H -3.75738200 -0.21708500 -2.62338200 | H -4.78633400 -0.19570500 -1.63983400  |
| C -0.90208900 1.62782900 -1.34349700  | C -3.29419200 -2.58433700 0.59591600  | H -3.50525400 0.12744600 -2.81004300   |
| C -0.25358300 4.23518500 -0.57779900  | H -4.05550200 -2.11548100 1.22501600  | C -3.45003300 -2.58273200 0.15815400   |
| H -0.14516700 3.45619200 1.41990800   | H -3.73705600 -3.47679400 0.14237000  | H -4.27409000 -2.16322500 0.74199500   |
| C -0.82005300 2.64133500 -2.29530800  | H -2.48016600 -2.90878200 1.25124900  | H -3.84989000 -3.40849500 -0.43876700  |
| H -1.15978300 0.62119000 -1.66442000  | C -4.09247700 0.89341000 1.83239000   | H -2.72568800 -2.99647200 0.86616800   |
| C -0.49111800 3.94087800 -1.91933200  | H -4.54119900 1.77261700 2.30483300   | C -3.93827800 0.63087100 2.15073300    |
| H -0.00174400 5.24514500 -0.27627000  | H -4.88180400 0.38427900 1.27166300   | H -4.32358000 1.44070000 2.77793100    |
| H -1.01626800 2.40220100 -3.33365500  | H -3.75734600 0.21695500 2.62333100   | H -4.79140500 0.18291400 1.63208700    |
| H -0.42599300 4.72414600 -2.66573400  | C -1.35627200 2.28917600 1.74622700   | H -3.51147900 -0.13415300 2.80520800   |
| C 1.95481700 1.03586500 0.86951700    | H -0.52279200 2.65991400 1.13800600   | C -1.24416300 2.08907700 1.88756000    |
| C 2.65108900 1.71916400 1.86634700    | H -1.78907400 3.16316300 2.24214000   | H -0.48065200 2.52688100 1.23078400    |
| C 2.32507300 1.20734800 -0.46596300   | H -0.94289200 1.64355100 2.52788300   | H -1.61740600 2.91319900 2.50247000    |
| C 3.69675500 2.57776300 1.53763700    | C -3.29437400 2.58430100 -0.59593500  | H -0.74620200 1.38989200 2.56975400    |
| H 2.36961500 1.58435000 2.90595900    | H -4.05558700 2.11536400 -1.22509100  | C -3.46261100 2.57747800 -0.16183000   |
| C 3.37273000 2.05876300 -0.79384400   | H -3.73738300 3.47667900 -0.14237500  | H -4.28353800 2.15435200 -0.74747300   |
| H 1.78941500 0.68817200 -1.24797600   | H -2.48035800 2.90888200 -1.25121200  | H -3.86747400 3.40125900 0.43445400    |
| C 4.05820000 2.74843000 0.20459200    | N 1.89528300 0.00003900 0.00004700    | H -2.73868600 2.99465300 -0.86825200   |
| H 4.22846900 3.10652600 2.31979900    |                                       |                                        |
| H 3.65025500 2.18766000 -1.83291500   | E <sub>BENZ</sub> = -1811.86870693    | E <sub>BENZ</sub> = -1747.28132206     |
| H 4.87305800 3.41343900 -0.05620900   | Thermal correction= 0.387813          | Thermal correction= 0.382444           |
| H -0.99568400 -2.17385100 -0.28857600 |                                       |                                        |
|                                       |                                       |                                        |
| E <sub>BENZ</sub> = -1690.49153051    |                                       |                                        |
| Thermal correction= 0.426844          |                                       |                                        |

| <b>1a</b>                            | <b>1b</b>                             | <b>HN(SiMe<sub>3</sub>)<sub>2</sub></b> |
|--------------------------------------|---------------------------------------|-----------------------------------------|
| Zn -1.51908000 0.01150500 0.91661500 | Mg -1.64167300 -0.01581300 1.08852900 | N 0.00001100 0.00035000 -0.81411400     |
| C 2.08596300 -1.32276000 -1.11633100 | C 0.16403100 -0.12881600 -0.16484200  | Si -1.58770100 0.00808600 -0.08766200   |
| C 0.26171300 -0.13030700 -0.26345200 | N 1.14086100 0.76687100 -0.36325900   | Si 1.58770400 -0.00801500 -0.08765100   |
| N 1.24426000 0.76039000 -0.43319400  | N 0.54652300 -1.29619500 -0.69381900  | C -2.81011500 0.60410100 -1.38856000    |
| N 0.64275000 -1.30288800 -0.77495100 | C 1.13639600 2.06633100 0.22891200    | H -2.57586700 1.62080200 -1.71625800    |
| C 1.22875800 2.06178100 0.15569200   | C 1.01710300 2.14792100 1.61754300    | H -2.80103300 -0.04502800 -2.26985700   |
| C 1.07171400 2.14669600 1.53985600   | C 1.23489600 3.22218200 -0.55867300   | H -3.83075600 0.60532600 -0.99474300    |
| C 1.35353700 3.21391300 -0.63319100  | C 0.98335300 3.38748300 2.24538700    | C -1.59720600 1.17118300 1.39316400     |
| C 1.02621700 3.38825000 2.16253900   | H 0.94886600 1.23743700 2.20076200    | H -2.58501500 1.19134900 1.86350300     |
| H 0.98258500 1.23833600 2.12313600   | C 1.21459100 4.45422200 0.09977300    | H -0.87907700 0.86266800 2.15818100     |
| C 1.31859300 4.44805800 0.02053600   | C 1.09076000 4.54532000 1.48236300    | H -1.34517900 2.19098300 1.09042400     |

|                                       |                                       |                                       |
|---------------------------------------|---------------------------------------|---------------------------------------|
| C 1.15744800 4.54331600 1.39904000    | H 0.87540100 3.44010600 3.32152400    | C -2.09242200 -1.71037600 0.49640700  |
| H 0.88848400 3.44468300 3.23503300    | H 1.27835900 5.35972000 -0.49322700   | H -1.39369100 -2.09158400 1.24617900  |
| H 1.40204100 5.35153200 -0.57307700   | H 1.06604500 5.51800200 1.95867200    | H -3.09184900 -1.70388200 0.94300500  |
| H 1.12281800 5.51747700 1.87172400    | C -0.32023900 -2.43047900 -0.82165100 | H -2.10127600 -2.41822300 -0.33760700 |
| C -0.23223600 -2.42898100 -0.91908200 | C -0.15063100 -3.54010400 0.00644300  | C 1.59673900 -1.17175500 1.39265700   |
| C -0.04950700 -3.56224900 -0.12664800 | C -1.33117900 -2.39717800 -1.79714600 | H 2.58449600 -1.19234600 1.86308400   |
| C -1.25991700 -2.36682000 -1.87524300 | C -0.98573100 -4.64277300 -0.13254200 | H 0.87860500 -0.86342400 2.15774100   |
| C -0.89057100 -4.65795700 -0.27889200 | C -2.15689300 -3.51854500 -1.91368100 | H 1.34452900 -2.19136200 1.08942700   |
| C -2.09195500 -3.48241200 -2.00453000 | C -1.98841700 -4.63153400 -1.09726700 | C 2.81014600 -0.60373900 -1.38865500  |
| C -1.91317000 -4.61715400 -1.22175300 | H -0.86001500 -5.49728300 0.52059900  | H 2.80151000 0.04589800 -2.26958400   |
| H -0.75431100 -5.53042100 0.34788300  | H -2.94793200 -3.50971800 -2.65436000 | H 3.83070000 -0.60556500 -0.99461000  |
| H -2.89605900 -3.45130300 -2.73038300 | H -2.64817200 -5.48401300 -1.20674100 | H 2.57557900 -1.62015800 -1.71699100  |
| H -2.57865500 -5.46382000 -1.34088400 | C 1.33869900 3.16513300 -2.05922000   | C 2.09284000 1.71008800 0.49715100    |
| C 1.50226900 3.15072300 -2.12971500   | H 2.34958500 2.89244600 -2.37634500   | H 1.39419500 2.09113500 1.24708800    |
| H 2.52109300 2.87235400 -2.41492000   | H 0.64243800 2.43698800 -2.47963300   | H 3.09227600 1.70320100 0.94372100    |
| H 0.81554200 2.42443300 -2.56870800   | H 1.10457700 4.13744500 -2.49366800   | H 2.10183600 2.41829000 -0.33656500   |
| H 1.28600400 4.12250700 -2.57444500   | H 0.62008200 -3.52744500 0.76285600   | H 0.00000100 0.00145200 -1.82594700   |
| H 0.73570400 -3.57372400 0.61455500   | C -1.55443900 -1.18659500 -2.66206200 |                                       |
| C -1.49725700 -1.13844900 -2.71074000 | H -2.05500200 -0.39858300 -2.09422400 | E <sub>BENZ</sub> = -873.787557664    |
| H -2.02036300 -0.37567600 -2.12869600 | H -0.61409600 -0.77457400 -3.03510300 | E <sub>THF</sub> = -873.788501684     |
| H -0.56196500 -0.69880200 -3.06384000 | H -2.18465300 -1.43551100 -3.51644400 | Thermal correction= 0.195486          |
| H -2.11396400 -1.37870500 -3.57753500 | H 2.09791400 -1.80029500 -2.04809600  |                                       |
| H 2.23701800 -1.82780600 -2.06998500  | H 1.96785800 0.49870900 -2.27446500   |                                       |
| H 2.12114700 0.47325000 -2.31911700   | C 2.85741300 -1.96436300 -0.04723600  |                                       |
| C 2.92719600 -1.97385200 -0.04127300  | C 4.06033900 -2.54238100 -0.45206600  |                                       |
| C 4.14560600 -2.55207700 -0.39648900  | C 2.54412200 -1.91898800 1.31338800   |                                       |
| C 2.56212900 -1.91886600 1.30597700   | C 4.94697100 -3.06049300 0.48669600   |                                       |
| C 4.99712300 -3.06113900 0.57895500   | H 4.31225500 -2.57272100 -1.50666100  |                                       |
| H 4.43728500 -2.58949100 -1.44054000  | C 3.42821700 -2.44242600 2.25209300   |                                       |
| C 3.41141300 -2.43333600 2.28105500   | H 1.61039300 -1.48768200 1.65469400   |                                       |
| H 1.61395800 -1.49045400 1.60928800   | C 4.63291900 -3.00963500 1.84253300   |                                       |
| C 4.63198900 -3.00059000 1.92158600   | H 5.87984100 -3.50451500 0.15980500   |                                       |
| H 5.94250700 -3.50552100 0.29085700   | H 3.16850200 -2.40515200 3.30332900   |                                       |
| H 3.11149700 -2.38925400 3.32124900   | H 5.32035900 -3.41559700 2.57534400   |                                       |
| H 5.29206400 -3.39951300 2.68287000   | C 3.60980900 0.71305600 -0.94853600   |                                       |
| C 3.72743800 0.68733500 -0.94930300   | C 4.48132100 0.93259200 -2.01676900   |                                       |
| C 4.62940000 0.89567700 -1.99421900   | C 4.07552900 0.89367000 0.35569800    |                                       |
| C 4.15738900 0.87332300 0.36644400    | C 5.80146300 1.31226200 -1.79104200   |                                       |
| C 5.94484000 1.26951900 -1.73389800   | H 4.12398300 0.80210800 -3.03324300   |                                       |
| H 4.29985000 0.76103800 -3.01949000   | C 5.39134500 1.27942100 0.58241500    |                                       |
| C 5.46843600 1.25343800 0.62741400    | H 3.41531400 0.72644000 1.19385200    |                                       |
| H 3.47332900 0.71431600 1.18688800    | C 6.25875400 1.48656900 -0.48801600   |                                       |
| C 6.36646000 1.44932600 -0.41965100   | H 6.46736800 1.47656800 -2.62996900   |                                       |
| H 6.63478500 1.42515800 -2.55483600   | H 5.74009500 1.41551900 1.59904900    |                                       |
| H 5.78945300 1.39380700 1.65254400    | H 7.28424800 1.78635400 -0.30705400   |                                       |
| H 7.38814300 1.74469800 -0.21191000   | C 2.21920900 0.22944100 -1.24477500   |                                       |
| C 2.34322700 0.20946700 -1.28133700   | Cl -0.76602600 -0.76776300 3.08202500 |                                       |

|                                       |                                       |  |
|---------------------------------------|---------------------------------------|--|
| Cl -0.75637100 -0.75596800 2.95055900 | N -3.32280700 0.59571300 0.27719400   |  |
| N -3.23519500 0.57938800 0.17701100   | Si -4.57038800 -0.58742000 0.33242100 |  |
| Si -4.50058600 -0.58948000 0.28991800 | Si -3.41128500 2.19564200 -0.34495100 |  |
| Si -3.30390600 2.19676700 -0.41282900 | C -3.84380100 -2.14223600 1.13908700  |  |
| C -3.80884300 -2.15688900 1.08696500  | H -2.96479600 -2.52729100 0.61214200  |  |
| H -2.96010600 -2.57004000 0.53449100  | H -3.56553300 -1.97497000 2.18479300  |  |
| H -3.48366500 -1.98099700 2.11625200  | H -4.57922600 -2.95266500 1.13198800  |  |
| H -4.57583900 -2.93760500 1.11354200  | C -5.20194800 -1.06870100 -1.38667400 |  |
| C -5.17545300 -1.05896200 -1.41609800 | H -5.98905500 -1.82724100 -1.32548700 |  |
| H -5.96905600 -1.80915000 -1.33724400 | H -5.61648100 -0.20352700 -1.91259800 |  |
| H -5.59089600 -0.19123800 -1.93631900 | H -4.39323300 -1.47243200 -2.00036900 |  |
| H -4.38307000 -1.47372700 -2.04412800 | C -6.06918900 -0.08043500 1.36421000  |  |
| C -5.95760900 -0.01736100 1.34671600  | H -6.61204800 0.75101300 0.90801500   |  |
| H -6.48637900 0.82369300 0.89176900   | H -6.77030900 -0.91403500 1.47638600  |  |
| H -6.68091900 -0.82724000 1.48797900  | H -5.75641400 0.23292200 2.36457200   |  |
| H -5.61017300 0.29878300 2.33463600   | C -2.56309100 3.39457500 0.84571400   |  |
| C -2.55103700 3.38500900 0.84730300   | H -1.50453000 3.15607100 0.98378700   |  |
| H -1.49398000 3.17048100 1.02784300   | H -2.60732500 4.42469300 0.47811000   |  |
| H -2.61148000 4.42374000 0.50679500   | H -3.04045800 3.36704100 1.82978800   |  |
| H -3.07143800 3.31048600 1.80653900   | C -2.48641600 2.34785700 -1.99360200  |  |
| C -2.28087500 2.39035700 -1.99713500  | H -1.45960300 1.98817200 -1.88219100  |  |
| H -1.26540200 2.01649400 -1.84121400  | H -2.96465600 1.75396900 -2.77807700  |  |
| H -2.71817800 1.83228800 -2.83003900  | H -2.43993300 3.38634400 -2.33684300  |  |
| H -2.20427700 3.44049200 -2.29662000  | C -5.17336600 2.81586300 -0.63139800  |  |
| C -5.05666600 2.78787700 -0.79383100  | H -5.72839200 2.88478400 0.30769500   |  |
| H -5.66180100 2.85218700 0.11375200   | H -5.15398800 3.81350600 -1.08168600  |  |
| H -5.02214800 3.78616100 -1.24184400  | H -5.73470500 2.16177800 -1.30452800  |  |
| H -5.57285600 2.12873100 -1.49671900  | C 1.97659500 -1.30504100 -1.08487600  |  |
|                                       |                                       |  |
| E <sub>BENZ</sub> = -2628.62335051    | E <sub>BENZ</sub> = -2564.04155895    |  |
| Thermal correction= 0.621109          | Thermal correction= 0.622332          |  |

| <b>1a · HN(SiMe<sub>3</sub>)<sub>2</sub></b> | <b>1b · HN(SiMe<sub>3</sub>)<sub>2</sub></b> | <b>L2HCl</b>                          |
|----------------------------------------------|----------------------------------------------|---------------------------------------|
| Zn -1.27498200 0.46921500 0.26144900         | Mg -1.37560400 0.50056800 0.30847800         | Cl 0.23259500 -2.19683700 2.29363500  |
| N 1.87517100 0.89499400 -0.32203600          | Cl -1.06706900 2.27119400 1.80456200         | N 1.03652000 -0.75565900 -0.57244600  |
| N 1.37393700 -1.03676500 -1.17440500         | N 1.83864700 0.89918800 -0.32527000          | N -1.14003200 -0.78980200 -0.16152800 |
| C 1.78118400 2.23856900 0.18043500           | N 1.33360000 -1.04108500 -1.15032200         | C 2.36900100 -1.24455800 -0.76367400  |
| C 1.37793500 3.27408100 -0.67097500          | C 1.74210700 2.24999400 0.15685400           | C 3.10855700 -0.82032600 -1.87871400  |
| C 2.16888000 2.49282500 1.49018200           | C 1.32237200 3.27009200 -0.70575400          | C 2.90158600 -2.12973000 0.17215400   |
| C 1.35658200 4.56914400 -0.14965100          | C 2.13668400 2.52691500 1.45997300           | C 4.41140400 -1.30498300 -2.00917900  |
| C 2.15259100 3.78865200 1.98462800           | C 1.29305400 4.57210900 -0.20284800          | C 4.19659100 -2.60746900 0.00445300   |
| C 1.74128900 4.82950700 1.16021100           | C 2.11093200 3.82941700 1.93651800           | C 4.95662500 -2.18797700 -1.08218900  |
| H 1.01959400 5.38131800 -0.78382200          | C 1.68423000 4.85452100 1.10058800           | H 4.99954600 -0.99236300 -2.86505600  |
| H 2.43414900 3.97855800 3.01278300           | H 0.94357200 5.37203000 -0.84574800          | H 4.60902300 -3.29473700 0.73313500   |
| H 1.70615000 5.84382700 1.53978500           | H 2.39706800 4.03643200 2.96009000           | H 5.96952500 -2.55006300 -1.21441900  |
| C 0.68663400 -2.08566400 -1.86681100         | H 1.64134000 5.87358100 1.46635300           | C -2.44481200 -1.36317600 -0.08612200 |
| C 0.90643700 -3.41148500 -1.48958900         | C 0.64125900 -2.10216700 -1.81834300         | C -2.85169700 -2.12639900 -1.18296700 |

|                                        |                                        |                                       |
|----------------------------------------|----------------------------------------|---------------------------------------|
| C -0.06317300 -1.78025700 -3.01372000  | C 0.85781000 -3.42083900 -1.41419400   | C -3.28925900 -1.17478800 1.01908200  |
| C 0.32751400 -4.45011600 -2.20806600   | C -0.11504100 -1.81901300 -2.96702500  | C -4.10139300 -2.73071000 -1.20171700 |
| C -0.63658900 -2.84268000 -3.71726000  | C 0.27170600 -4.47270600 -2.10706300   | C -4.55133100 -1.77445900 0.95991600  |
| C -0.45591800 -4.16254400 -3.32081500  | C -0.69557100 -2.89453100 -3.64471700  | C -4.96009800 -2.54373500 -0.12361700 |
| H 0.49051200 -5.47493200 -1.89768800   | C -0.51662400 -4.20628000 -3.22171000  | H -4.40326500 -3.32677100 -2.05417700 |
| H -1.22769900 -2.62376900 -4.59826500  | H 0.43312300 -5.49127300 -1.77586600   | H -5.21730800 -1.64819600 1.80587600  |
| H -0.91529700 -4.96380900 -3.88763500  | H -1.29134400 -2.69248800 -4.52658800  | H -5.94318500 -2.99927300 -0.12220600 |
| H 1.53051700 -3.62565400 -0.63486100   | H -0.98147200 -5.01785200 -3.76909600  | H -2.18094800 -2.22917600 -2.02843500 |
| C -0.24413700 -0.36630600 -3.47909100  | H 1.48559100 -3.61877600 -0.55819800   | C -2.87666800 -0.41360600 2.24873700  |
| H -0.93216800 0.16338700 -2.81605700   | C -0.29914900 -0.41474100 -3.46039300  | H -1.89994300 -0.75913100 2.59789800  |
| H 0.70526400 0.17454500 -3.48951800    | H -0.99645800 0.12334500 -2.81370000   | H -2.83159100 0.66265700 2.05754400   |
| H -0.66131600 -0.33963300 -4.48545300  | H 0.64656300 0.13209700 -3.47111500    | H -3.60311900 -0.57410800 3.04610100  |
| H 3.11399200 -1.26008800 -2.35153400   | H -0.70716400 -0.40917500 -4.47093200  | H -0.68194000 0.66112600 1.26865400   |
| C 3.58472700 -1.85450000 -0.35355500   | H 3.07020300 -1.28320100 -2.32975800   | C -1.67355200 1.66252300 -0.34567700  |
| C 4.81488500 -2.40213400 -0.71389300   | C 3.54672300 -1.84814800 -0.32457100   | C -1.83129300 2.83954600 0.38757600   |
| C 3.09149100 -2.08022400 0.93218800    | C 4.77408800 -2.40409100 -0.68155500   | C -2.31764600 1.53131900 -1.57752300  |
| C 5.54776400 -3.15687000 0.19760600    | C 3.05952100 -2.05219800 0.96722800    | C -2.62109500 3.87500600 -0.10424500  |
| H 5.20769200 -2.22667500 -1.70942900   | C 5.50994800 -3.14561100 0.23844300    | H -1.32975000 2.94296400 1.34322200   |
| C 3.81924500 -2.83681100 1.84412500    | H 5.16248900 -2.24548900 -1.68163600   | C -3.11537500 2.56199400 -2.06408300  |
| H 2.13864800 -1.66240500 1.22222700    | C 3.79012100 -2.79551400 1.88777700    | H -2.20820100 0.61732700 -2.14767300  |
| C 5.05198100 -3.37538300 1.48028600    | H 2.10893700 -1.62739500 1.25489400    | C -3.26749200 3.73637700 -1.32976800  |
| H 6.50370500 -3.57514400 -0.09446300   | C 5.02003400 -3.34253800 1.52680100    | H -2.73630000 4.78512100 0.47236800   |
| H 3.42383600 -3.00315100 2.83949600    | H 6.46367100 -3.57041700 -0.05147700   | H -3.62232400 2.44665900 -3.01489300  |
| H 5.61992300 -3.96494800 2.19021300    | H 3.39953500 -2.94487700 2.88778300    | H -3.89060700 4.53749800 -1.70942900  |
| C 3.07296000 0.54722100 -1.14644700    | H 5.59024700 -3.92172600 2.24342300    | C 0.68243700 0.68562800 -0.41043900   |
| C 2.85195900 -0.96815200 -1.33494400   | C 3.03251200 0.54136500 -1.15021300    | C -0.75608100 0.59807800 0.18247700   |
| N -2.69236900 0.49963200 -1.18305400   | C 2.81057500 -0.97645000 -1.31684600   | H 0.63371400 1.14250700 -1.40000800   |
| Si -3.59406000 -0.92402900 -1.55957600 | N -2.76285000 0.50945000 -1.16907200   | C 1.64542600 1.44964200 0.45394300    |
| Si -3.14472800 2.02218700 -1.89157600  | Si -3.65914900 -0.91588500 -1.53931600 | C 2.15027300 2.67137500 0.01043900    |
| C -2.75098200 -2.51017600 -0.93162400  | Si -3.21470100 2.01153000 -1.91441400  | C 2.01487500 0.95783200 1.71023300    |
| H -1.67317000 -2.42512200 -0.80614900  | C -2.81687400 -2.49028800 -0.87323400  | C 3.02040700 3.40556500 0.81326100    |
| H -3.18571500 -2.85567900 0.01262200   | H -1.73723500 -2.40960000 -0.75511200  | H 1.85640100 3.05301000 -0.96164400   |
| H -2.91635500 -3.31590600 -1.65138200  | H -3.24929700 -2.81343600 0.08019400   | C 2.88979100 1.69010800 2.50467100    |
| C -3.88018700 -1.13813200 -3.42255500  | H -2.98756700 -3.31258700 -1.57278300  | H 1.61835600 0.00828900 2.06017600    |
| H -4.37053800 -2.09658500 -3.62151500  | C -3.93153400 -1.17399600 -3.39910400  | C 3.39345000 2.91250700 2.06019700    |
| H -4.52778900 -0.35081300 -3.81726100  | H -4.41383400 -2.13985000 -3.58115200  | H 3.40680900 4.35581500 0.46378600    |
| H -2.94844500 -1.11215500 -3.98867000  | H -4.58302500 -0.39945300 -3.81261400  | H 3.17860700 1.30245300 3.47440700    |
| C -5.33013700 -1.01856000 -0.79884400  | H -2.99744700 -1.15185800 -3.96142600  | H 4.07543900 3.47802200 2.68464800    |
| H -5.98145200 -0.20979000 -1.13374000  | C -5.40188600 -1.00653800 -0.79107500  | H 2.29610800 -2.41479000 1.02632300   |
| H -5.79821000 -1.96585500 -1.08974100  | H -6.05468200 -0.20911000 -1.14985300  | C 2.53761700 0.10212100 -2.92366100   |
| H -5.30598300 -0.98751700 0.29231400   | H -5.86308300 -1.96269900 -1.06316500  | H 1.50000200 -0.14887600 -3.15695300  |
| C -5.02368300 2.26159300 -1.99775800   | H -5.38683000 -0.94946100 0.29945300   | H 2.56271700 1.14533000 -2.59420500   |
| H -5.23745700 3.25644000 -2.40228400   | C -5.09237000 2.26187300 -2.02946800   | H 3.11613200 0.03647100 -3.84594300   |
| H -5.51124000 1.53325700 -2.65079800   | H -5.30127800 3.25140700 -2.44921900   | C -0.03131600 -1.50698300 -0.33173700 |
| H -5.49172800 2.19701300 -1.01223500   | H -5.58066900 1.52567700 -2.67337300   | H -0.03704100 -2.57763500 -0.44403400 |
| C -2.49915100 3.51683800 -0.94617200   | H -5.56472200 2.21325900 -1.04493500   |                                       |
| H -1.42478700 3.50098000 -0.76468100   | C -2.56549400 3.52435700 -0.99574600   | E <sub>BENZ</sub> = -1690.49998045    |



|                                       |                                       |                              |
|---------------------------------------|---------------------------------------|------------------------------|
| H -2.73232800 4.41647300 -1.52689900  | H -1.49140800 3.51211300 -0.81017800  | Thermal correction= 0.425909 |
| H -2.97149700 3.61096400 0.03265600   | H -2.79330300 4.41314100 -1.59496600  |                              |
| C -2.52886500 2.22936900 -3.67864200  | H -3.04080800 3.64238200 -0.02064800  |                              |
| H -2.85250000 1.40840600 -4.32249300  | C -2.59484900 2.18754200 -3.70390900  |                              |
| H -2.93425700 3.15759600 -4.09548200  | H -2.92264000 1.35864500 -4.33544700  |                              |
| H -1.44010400 2.29342500 -3.74192400  | H -2.99292300 3.11172100 -4.13648700  |                              |
| H 2.45034900 1.66578200 2.12605300    | H -1.50545800 2.24279700 -3.76625200  |                              |
| C 0.96800400 3.02203000 -2.09746200   | H 2.43163700 1.71187900 2.10531200    |                              |
| H 1.83927200 2.88574100 -2.74738500   | C 0.90062300 2.99268700 -2.12417000   |                              |
| H 0.34560800 2.13303900 -2.18828100   | H 1.76479700 2.82279100 -2.77540300   |                              |
| H 0.39782800 3.86483300 -2.48743800   | H 0.26042800 2.11397200 -2.19042500   |                              |
| N -2.13631300 -0.89544200 1.93653600  | H 0.34465900 3.83680900 -2.53134400   |                              |
| Si -0.87606100 -1.78882800 2.84274500 | N -2.19209100 -0.81942300 1.95424100  |                              |
| Si -3.45902200 -0.04590200 2.85516400 | Si -0.93581300 -1.70436000 2.88514700 |                              |
| C -0.23842700 -3.11131800 1.68048000  | Si -3.52407000 0.03027800 2.87120600  |                              |
| H -1.01610500 -3.84466100 1.45196000  | C -0.29018300 -3.03806600 1.74083600  |                              |
| H 0.09217500 -2.68747200 0.73651500   | H -1.06511400 -3.77303600 1.50874700  |                              |
| H 0.60625800 -3.64643400 2.12337700   | H 0.05217700 -2.62156900 0.79748800   |                              |
| C -1.52797900 -2.70554400 4.35551400  | H 0.54976000 -3.56944700 2.19701700   |                              |
| H -0.70008200 -3.26449700 4.80479600  | C -1.59881300 -2.60117800 4.40348900  |                              |
| H -1.94395300 -2.05843900 5.12774500  | H -0.77173700 -3.15018700 4.86620700  |                              |
| H -2.29472400 -3.43166700 4.07235900  | H -2.02381200 -1.94620200 5.16386100  |                              |
| C 0.48789400 -0.61100000 3.34965300   | H -2.35927900 -3.33502300 4.12359300  |                              |
| H 0.11441900 0.17293600 4.00979800    | C 0.42561600 -0.51811000 3.37690100   |                              |
| H 1.27952300 -1.15828000 3.87199000   | H 0.05046600 0.28205100 4.01605800    |                              |
| H 0.92047700 -0.10525600 2.48582900   | H 1.21190300 -1.05674300 3.91598000   |                              |
| C -2.79699000 0.71273100 4.43715700   | H 0.86748200 -0.03307000 2.50556100   |                              |
| H -3.62997600 1.22000400 4.93546200   | C -2.86622200 0.81285700 4.44209800   |                              |
| H -2.38529100 -0.00791000 5.14473300  | H -3.70274500 1.31890600 4.93565100   |                              |
| H -2.04039000 1.46194200 4.20315500   | H -2.44538200 0.10616000 5.15814700   |                              |
| C -4.31739300 1.26811200 1.83606900   | H -2.11756300 1.56595400 4.19454300   |                              |
| H -4.28536900 1.04003500 0.77240400   | C -4.38341000 1.32819300 1.83210400   |                              |
| H -5.36519200 1.34267600 2.14349200   | H -4.36384100 1.07982200 0.77223200   |                              |
| H -3.83098000 2.23246000 1.98071300   | H -5.42807500 1.41248000 2.14762400   |                              |
| C -4.71562200 -1.39145200 3.27841100  | H -3.89335100 2.29385500 1.95493600   |                              |
| H -4.29819900 -2.15567400 3.93734200  | C -4.77299800 -1.31956800 3.29790100  |                              |
| H -5.57757800 -0.94846100 3.78707100  | H -4.35559000 -2.07764000 3.96363700  |                              |
| H -5.09299600 -1.88984600 2.38040600  | H -5.63965300 -0.87775900 3.79936500  |                              |
| H -2.60138500 -1.57509400 1.33521200  | H -5.14350000 -1.82457500 2.40075000  |                              |
| C 0.86513400 0.02445300 -0.50951600   | H -2.66356400 -1.52000500 1.38040600  |                              |
| C 4.40525200 0.99579100 -0.61432200   | C 0.82291000 0.02852500 -0.49660300   |                              |
| C 5.27874400 1.64903400 -1.48460200   | C 4.36772000 0.99730200 -0.63137100   |                              |
| C 4.81607600 0.76127100 0.70069200    | C 5.23740000 1.63687600 -1.51558600   |                              |
| C 6.54415000 2.04832500 -1.06164300   | C 4.78510500 0.78280400 0.68501900    |                              |
| H 4.96356000 1.85099300 -2.50291500   | C 6.50496500 2.04213200 -1.10493800   |                              |
| C 6.07522400 1.16290200 1.12745900    | H 4.91732400 1.82351100 -2.53530300   |                              |
| H 4.15430200 0.25952300 1.39060500    | C 6.04649500 1.19031300 1.09954400    |                              |

|                                      |                                     |  |
|--------------------------------------|-------------------------------------|--|
| C 6.94529800 1.80464200 0.24764600   | H 4.12653400 0.29197500 1.38576400  |  |
| H 7.20873900 2.55515700 -1.75128300  | C 6.91253000 1.81827200 0.20592200  |  |
| H 6.37813200 0.97508000 2.15071600   | H 7.16628900 2.53821500 -1.80546600 |  |
| H 7.92651600 2.11816300 0.58420700   | H 6.35432300 1.01792100 2.12406800  |  |
| H 2.92722100 1.02516500 -2.12070000  | H 7.89547200 2.13652900 0.53289600  |  |
| Cl -1.01876600 2.20385600 1.80752200 | H 2.88268100 1.00515800 -2.13079000 |  |
|                                      |                                     |  |
| E <sub>BENZ</sub> = -3502.42007344   | E <sub>BENZ</sub> = -3437.84654929  |  |
| Thermal correction = 0.851401        | E <sub>THF</sub> = -3437.85541490   |  |
|                                      | Thermal correction = 0.852699       |  |

| <b>2a</b>                             | <b>2b</b>                            | <b>2a · HN(SiMe<sub>3</sub>)<sub>2</sub></b> |
|---------------------------------------|--------------------------------------|----------------------------------------------|
| Zn -1.55977200 -0.25367200 1.06029000 | Mg 1.66465100 0.31781300 1.20898000  | Zn -1.28132100 -0.36855600 -0.35084500       |
| C 2.41795000 -0.88010700 -0.65858000  | C -0.36887700 0.02867600 0.38593100  | N 1.84482900 -0.76517800 -0.55890700         |
| C 0.45044200 -0.02490300 0.32595100   | N -1.27974900 -0.94553800 0.44886000 | N 1.58357100 0.85265200 0.88084300           |
| N 1.35935500 0.94468400 0.42360400    | N -0.89762900 1.06566200 -0.27093400 | C 1.62025800 -2.04945600 -1.14686000         |
| N 0.98351300 -1.06396100 -0.31680500  | C -1.11953700 -2.17486200 1.16929200 | C 1.98908800 -2.31227300 -2.47021900         |
| C 1.18179300 2.17002000 1.14676500    | C -1.27889900 -2.18718600 2.56377600 | C 1.07555900 -3.04328000 -0.33922000         |
| C 1.27741300 2.16722500 2.54685900    | C -0.83251600 -3.34160300 0.46337500 | C 1.80208100 -3.61062800 -2.94360400         |
| C 0.94094600 3.34565300 0.43859400    | C -1.09090800 -3.40586100 3.22264600 | C 0.88031300 -4.32399900 -0.83695000         |
| C 1.07418900 3.38221600 3.20776400    | C -0.66811800 -4.54354800 1.14054000 | C 1.25591200 -4.60977900 -2.14459900         |
| C 0.76071400 4.54347300 1.11900800    | C -0.78764800 -4.57114200 2.52611000 | H 2.05971600 -3.82986000 -3.97368300         |
| C 0.81726000 4.55716700 2.50879400    | H -1.19219800 -3.43521200 4.30153800 | H 0.43590100 -5.08477100 -0.20780000         |
| H 1.12566600 3.40067100 4.29037200    | H -0.43242500 -5.44545700 0.58926800 | H 1.10903300 -5.60406600 -2.54921200         |
| H 0.56068400 5.45303600 0.56629200    | H -0.64660600 -5.49963200 3.06676400 | C 1.11322300 1.44229900 2.10034300           |
| H 0.66234900 5.48247600 3.05106600    | C -0.17779700 2.26402200 -0.59507400 | C 1.23675100 2.82188400 2.27783400           |
| C 0.26140600 -2.25547100 -0.66069100  | C -0.14164700 3.31082300 0.32447400  | C 0.66000700 0.62382100 3.15002300           |
| C 0.18933800 -3.29875500 0.25944200   | C 0.46957000 2.36172900 -1.83750700  | C 0.86317000 3.41491700 3.47679800           |
| C -0.35228600 -2.34749200 -1.91960700 | C 0.52019100 4.49194800 0.00496800   | C 0.28628300 1.24740800 4.34380800           |
| C -0.47721700 -4.47252000 -0.07518200 | C 1.12243000 3.55905200 -2.13624200  | C 0.37610700 2.62393100 4.51166600           |
| C -1.01124200 -3.53754000 -2.23345400 | C 1.14103900 4.61808100 -1.23288400  | H 0.95197700 4.48780200 3.59604600           |
| C -1.06676400 -4.59396400 -1.32876000 | H 0.55900300 5.29809700 0.72643600   | H -0.07448600 0.63180400 5.15894100          |
| H -0.54588000 -5.27609900 0.64690900  | H 1.63754300 3.65189100 -3.08530000  | H 0.07685300 3.07384400 5.45099000           |
| H -1.50206400 -3.62629200 -3.19570100 | H 1.66317100 5.53247000 -1.48822700  | H 1.61881200 3.42970700 1.47243800           |
| H -1.59347200 -5.50237000 -1.59578200 | H -0.61282000 3.18691000 1.28851900  | C 0.56562400 -0.87009300 3.02411500          |
| H 0.63303400 -3.17590600 1.23646200   | C 0.50035700 1.20128800 -2.79417400  | H -0.29250500 -1.15397000 2.41072700         |
| C -0.34389800 -1.18903500 -2.87920500 | H 0.99664200 0.34182800 -2.33768300  | H 1.46212500 -1.28988000 2.56364800          |
| H -0.83555100 -0.31964200 -2.43683900 | H -0.50482000 0.88950900 -3.08952900 | H 0.44582700 -1.32972400 4.00530800          |
| H 0.67234100 -0.89483900 -3.15484300  | H 1.04840400 1.46313800 -3.69935800  | H 3.54823900 0.56523400 1.58581200           |
| H -0.87687900 -1.44473800 -3.79512600 | H -2.42165700 0.97202100 -1.73327800 | C 3.57766400 2.20253700 0.21418200           |
| H 2.54370400 -0.96516000 -1.73886200  | C -3.23886300 1.86409200 0.02469700  | C 4.56314300 2.85665400 0.94999000           |
| C 3.31005800 -1.88401500 0.02779100   | C -4.22365500 2.51896900 -0.71199100 | C 3.06473700 2.81176300 -0.93519800          |
| C 4.29365100 -2.55423700 -0.69643000  | C -3.13685000 2.10638600 1.39780400  | C 5.03155500 4.10647200 0.54839100           |
| C 3.18321000 -2.12855400 1.39841900   | C -5.10341100 3.40114700 -0.08744600 | H 4.95724000 2.39037000 1.84598100           |
| C 5.14795500 -3.45407300 -0.06182200  | H -4.30133200 2.33983900 -1.77896400 | C 3.52620200 4.05985000 -1.33415600          |
| H 4.39025400 -2.37352200 -1.76156200  | C -4.01143700 2.98824800 2.02155300  | H 2.28762600 2.31884900 -1.50705900          |

|                                        |                                       |                                       |
|----------------------------------------|---------------------------------------|---------------------------------------|
| C 4.03216500 -3.02806200 2.03211200    | H -2.35956100 1.62071600 1.97519800   | C 4.51182800 4.71137500 -0.59183700   |
| H 2.40618000 -1.63092400 1.96599600    | C -4.99875100 3.63670700 1.27985100   | H 5.79740400 4.60722200 1.12883000    |
| C 5.01858900 -3.69193100 1.30290900    | H -5.86373700 3.90747500 -0.67036300  | H 3.11652000 4.52666500 -2.22226700   |
| H 5.90770300 -3.97216700 -0.63503400   | H -3.91779200 3.17543800 3.08470900   | H 4.87107800 5.68520500 -0.90285000   |
| H 3.91946100 -3.21697400 3.09310600    | H -5.67797000 4.32669700 1.76633600   | C 3.23442400 -0.24189100 -0.42196900  |
| H 5.67789500 -4.39558500 1.79713500    | C -2.56678900 -0.60289600 -0.21978700 | C 3.05991200 0.85642500 0.65339800    |
| C 2.66480900 0.59259800 -0.20548500    | Cl 1.29027900 1.38387300 3.20305500   | N -2.43179500 -1.05333000 1.15783400  |
| Cl -1.34675000 -1.35692200 3.05746600  | N 3.16183600 -0.28482700 0.08720900   | Si -3.16303500 0.04684600 2.26611400  |
| N -3.06807500 0.33332100 -0.03531100   | Si 4.30833600 0.91071400 -0.37449500  | Si -2.74169000 -2.75788700 1.27665200 |
| Si -4.22233100 -0.86420200 -0.49185200 | Si 3.17016300 -1.95561500 -0.30335200 | C -2.44712900 1.80521500 2.12329400   |
| Si -3.04397300 2.00257500 -0.44724500  | C 3.78632300 2.55404600 0.40251400    | H -1.43180000 1.84780800 1.73155600   |
| C -3.74076300 -2.51189600 0.28863000   | H 2.78011700 2.85836600 0.10232000    | H -3.08492100 2.45353500 1.51238900   |
| H -2.74106800 -2.83529500 -0.01030400  | H 3.81122800 2.51474300 1.49603200    | H -2.41296800 2.26327900 3.11530400   |
| H -3.75900900 -2.46219100 1.38077500   | H 4.45954100 3.35887700 0.09101100    | C -2.95927900 -0.48817300 4.07471200  |
| H -4.43568400 -3.29914200 -0.02098100  | C 4.37736700 1.14935200 -2.25284500   | H -3.38333400 0.26622600 4.74542000   |
| C -4.26313900 -1.09862900 -2.37169900  | H 5.11636800 1.90525200 -2.53777900   | H -3.47454600 -1.43115400 4.27379300  |
| H -5.00644500 -1.84520200 -2.66988800  | H 4.64465200 0.21700100 -2.76012400   | H -1.91100600 -0.62439800 4.34315900  |
| H -4.50751800 -0.16386800 -2.88555800  | H 3.40472100 1.46794900 -2.63640900   | C -5.02817700 0.29926300 2.03080900   |
| H -3.28734100 -1.43168700 -2.73516100  | C 6.06841900 0.55412300 0.21426700    | H -5.59847300 -0.61380700 2.20954000  |
| C -5.97974600 -0.46585600 0.07589200   | H 6.49636200 -0.32057000 -0.28108100  | H -5.38808500 1.05952500 2.73313900   |
| H -6.38672300 0.41384600 -0.42780600   | H 6.72698100 1.40575500 0.01383400    | H -5.26924300 0.64380700 1.02223200   |
| H -6.65240900 -1.30609900 -0.12590500  | H 6.07998700 0.36729600 1.29214400    | C -4.49114800 -3.15867700 1.89241500  |
| H -5.99641900 -0.27409500 1.15278200   | C 4.84966700 -2.63496600 -0.83799700  | H -4.61631400 -4.24612600 1.92402400  |
| C -4.69857000 2.66256600 -1.07378700   | H 4.76448900 -3.69514700 -1.09757200  | H -4.70340900 -2.77649300 2.89351300  |
| H -4.59586100 3.71279700 -1.36564100   | H 5.23960900 -2.11118200 -1.71552400  | H -5.24869300 -2.76049000 1.21206900  |
| H -5.05706000 2.11118400 -1.94739500   | H 5.58894200 -2.54376900 -0.03836000  | C -2.58926300 -3.67456600 -0.36139100 |
| H -5.46837600 2.60394500 -0.30057200   | C 2.61758400 -2.93492500 1.22091000   | H -1.69234700 -3.43559800 -0.93052600 |
| C -2.56380800 3.01135300 1.07774700    | H 1.64814700 -2.60597200 1.61056800   | H -2.59138900 -4.75227900 -0.16367100 |
| H -1.60903200 2.69468100 1.50879500    | H 2.51513500 -4.00371500 1.01127800   | H -3.44317500 -3.45541800 -1.00594600 |
| H -2.46772300 4.07801600 0.85384000    | H 3.35284100 -2.81712400 2.02266700   | C -1.57603400 -3.62053200 2.50604400  |
| H -3.32804000 2.89354900 1.85164500    | C 1.95559600 -2.33176500 -1.71183400  | H -1.63895200 -3.16914500 3.49966500  |
| C -1.76666900 2.34652200 -1.80747200   | H 2.27651900 -1.83694500 -2.63389500  | H -1.84871200 -4.67678500 2.60226900  |
| H -2.06119300 1.85401900 -2.73947600   | H 1.86839600 -3.40391400 -1.91538600  | H -0.52967400 -3.58222900 2.19182000  |
| H -1.65345600 3.41623900 -2.01103300   | H 0.96097000 -1.95632700 -1.46064000  | H 3.51437200 0.22511500 -1.36540800   |
| H -0.78817400 1.95652400 -1.51858900   | H -3.36597700 -0.64573400 0.52184000  | C 4.26392300 -1.28658800 -0.08057400  |
| H 3.43798600 0.62037100 0.56382700     | C -2.89727200 -1.53312400 -1.35980600 | C 5.43859600 -1.36637100 -0.82637500  |
| C 3.04174700 1.53127300 -1.32346300    | C -4.11992300 -2.19970000 -1.39006600 | C 4.07809400 -2.16394900 0.99068200   |
| C 4.25724600 2.21057200 -1.29013700    | C -1.98419200 -1.73520400 -2.39928800 | C 6.41674100 -2.30671900 -0.50977900  |
| C 2.17586200 1.73393900 -2.40252900    | C -4.43287500 -3.05494900 -2.44548600 | H 5.58864500 -0.68800700 -1.65909800  |
| C 4.60976500 3.07941100 -2.32165400    | H -4.82784800 -2.05411700 -0.58153700 | C 5.04841900 -3.10672300 1.30542100   |
| H 4.92802000 2.06460300 -0.45064300    | C -2.29165600 -2.59030200 -3.45020200 | H 3.16368700 -2.12238500 1.56879600   |
| C 2.52273400 2.60260300 -3.42974200    | H -1.02048700 -1.24290400 -2.37359800 | C 6.22182100 -3.18001300 0.55531200   |
| H 1.21721900 1.23158500 -2.42662700    | C -3.51972300 -3.25194700 -3.47631100 | H 7.32526600 -2.35904700 -1.09800400  |
| C 3.74346700 3.27719000 -3.39199100    | H -5.38591800 -3.57046100 -2.45695500 | H 4.88783300 -3.78946400 2.13132900   |
| H 5.55679200 3.60462100 -2.28391200    | H -1.57115000 -2.74679600 -4.24429400 | H 6.97693100 -3.91781800 0.79935500   |
| H 1.83862300 2.75945200 -4.25529800    | H -3.75902800 -3.92070100 -4.29459700 | H 0.79987300 -2.79996000 0.67759200   |
| H 4.01346000 3.95637300 -4.19192100    | H -0.72309900 -3.29744500 -0.61003700 | C 2.49634600 -1.23176300 -3.38399300  |

|                                     |                                      |                                        |
|-------------------------------------|--------------------------------------|----------------------------------------|
| H 0.87946100 3.31193300 -0.63903400 | C -1.64801800 -0.94634400 3.33164400 | H 1.94517400 -0.30350800 -3.22573000   |
| C 1.59611700 0.91438700 3.31727800  | H -0.85169200 -0.19796000 3.31140000 | H 3.56263100 -1.03430800 -3.23186900   |
| H 0.79743500 0.17201800 3.24251300  | H -2.54950700 -0.48312200 2.92141300 | H 2.36040600 -1.52340200 -4.42572300   |
| H 2.51709200 0.45183800 2.95139300  | H -1.84360300 -1.19083700 4.37618100 | N -2.42373400 1.48283100 -1.19159100   |
| H 1.73430500 1.14358200 4.37430400  | C -2.32106400 0.87592000 -0.65119700 | Si -1.39334000 2.76441500 -1.90840300  |
|                                     |                                      | Si -3.90710900 0.95372400 -2.10030500  |
| E <sub>BENZ</sub> = -2628.62635441  | E <sub>BENZ</sub> = -2564.04422510   | C -0.42657100 3.52995400 -0.50371800   |
| Thermal correction= 0.619631        | Thermal correction= 0.620699         | H -1.07464600 3.93793300 0.27512800    |
|                                     |                                      | H 0.22111600 2.78884800 -0.04450100    |
|                                     |                                      | H 0.20759300 4.33993500 -0.87530200    |
|                                     |                                      | C -2.39086200 4.15883700 -2.69375000   |
|                                     |                                      | H -1.69503300 4.92013900 -3.06198400   |
|                                     |                                      | H -3.01186100 3.84776200 -3.53418100   |
|                                     |                                      | H -3.03807200 4.63929700 -1.95474700   |
|                                     |                                      | C -0.20696100 2.03160100 -3.15599800   |
|                                     |                                      | H -0.71936400 1.56952100 -3.99986500   |
|                                     |                                      | H 0.45165900 2.81888100 -3.53819200    |
|                                     |                                      | H 0.40036200 1.24943200 -2.69809700    |
|                                     |                                      | C -3.57541500 0.93325000 -3.94576800   |
|                                     |                                      | H -4.48846800 0.59578500 -4.44727300   |
|                                     |                                      | H -3.30896400 1.90191700 -4.37035900   |
|                                     |                                      | H -2.78521100 0.21463600 -4.16775100   |
|                                     |                                      | C -4.51159200 -0.73552000 -1.58110800  |
|                                     |                                      | H -4.45569700 -0.88399900 -0.50439100  |
|                                     |                                      | H -5.55366600 -0.84979800 -1.89737100  |
|                                     |                                      | H -3.91248600 -1.51006100 -2.05913700  |
|                                     |                                      | C -5.24305700 2.22147500 -1.68659800   |
|                                     |                                      | H -4.99179100 3.22286500 -2.04162500   |
|                                     |                                      | H -6.19040200 1.93076500 -2.15107700   |
|                                     |                                      | H -5.41800000 2.28033200 -0.60801700   |
|                                     |                                      | H -2.75084800 1.84224700 -0.29505400   |
|                                     |                                      | C 0.93738200 -0.08923900 0.15970500    |
|                                     |                                      | Cl -1.13596800 -1.25717900 -2.52373100 |
|                                     |                                      |                                        |
|                                     |                                      | E <sub>BENZ</sub> = -3502.42597866     |
|                                     |                                      | Thermal correction= 0.850138           |

| <b>2b · HN(SiMe<sub>3</sub>)<sub>2</sub></b> | <b>1b · THF</b>                      | <b>THF</b>                            |
|----------------------------------------------|--------------------------------------|---------------------------------------|
| Mg 1.38744800 -0.37402100 0.40396400         | Mg -1.44516400 0.13494700 0.86529600 | C 1.18253400 -0.46195300 0.00000000   |
| Cl 1.18812500 -1.28019900 2.56611700         | Cl -0.39937600 0.26545700 2.99434900 | O 0.00000200 -1.25696800 0.00000000   |
| N -1.80263600 -0.76884000 0.57143500         | N 1.50726600 0.83684400 -0.40140400  | C -1.18253200 -0.46195700 -0.00000100 |
| N -1.54331000 0.84284800 -0.87192000         | N 0.85631700 -1.12546900 -1.04557500 | C -0.77278000 1.02553500 0.00000100   |
| C -1.57443500 -2.05148600 1.16124500         | C 1.52185000 2.17531000 0.11365300   | C 0.77277600 1.02553700 0.00000000    |
| C -1.94608600 -2.31553500 2.48371100         | C 1.37710700 3.25833000 -0.76478400  | H 1.77629300 -0.71586700 0.88497600   |
| C -1.01714800 -3.04263100 0.35810100         | C 1.74042500 2.37218400 1.47401600   | H 1.77629400 -0.71586700 -0.88497600  |
| C -1.74997300 -3.61136000 2.96032100         | C 1.44601100 4.54456200 -0.22471600  | H -1.77629100 -0.71587200 -0.88497700 |
| C -0.81421000 -4.32111100 0.85883700         | C 1.80921000 3.66139800 1.98712100   | H -1.77629200 -0.71587300 0.88497400  |

|                                       |                                       |                                      |
|---------------------------------------|---------------------------------------|--------------------------------------|
| C -1.19262700 -4.60754700 2.16548500  | C 1.66452700 4.74962900 1.13337400    | H -1.16698600 1.53906200 -0.87811200 |
| H -2.00916100 -3.83059900 3.98999800  | H 1.31643400 5.39511000 -0.88460200   | H -1.16698500 1.53906000 0.87811500  |
| H -0.36136300 -5.07944300 0.23278300  | H 1.95508000 3.80784700 3.04981500    | H 1.16698000 1.53906400 -0.87811400  |
| H -1.03909300 -5.59976300 2.57266500  | H 1.70612700 5.75910000 1.52523100    | H 1.16698100 1.53906400 0.87811400   |
| C -1.06683900 1.43880600 -2.08561900  | C 0.01930100 -2.16205900 -1.54527400  |                                      |
| C -1.18635000 2.81982600 -2.25614600  | C 0.35352900 -3.49232600 -1.27170300  | E <sub>THF</sub> = -232.360555953    |
| C -0.60726900 0.62598700 -3.13721300  | C -1.06189700 -1.85085600 -2.38821800 | Thermal correction = 0.089390        |
| C -0.80376300 3.41943900 -3.44899100  | C -0.40795700 -4.53087300 -1.79064500 |                                      |
| C -0.22407100 1.25611700 -4.32467500  | C -1.81051700 -2.91887700 -2.89364800 |                                      |
| C -0.31088400 2.63368800 -4.48519100  | C -1.50367500 -4.24106800 -2.59902400 |                                      |
| H -0.89016800 4.49315800 -3.56267600  | H -0.14355200 -5.55710800 -1.56559500 |                                      |
| H 0.14186700 0.64483800 -5.14076700   | H -2.64763800 -2.69849000 -3.54471300 |                                      |
| H -0.00451900 3.08860600 -5.41981500  | H -2.10730700 -5.04067100 -3.01146200 |                                      |
| H -1.57291900 3.42338900 -1.44955500  | H 1.21102300 -3.70564300 -0.64756500  |                                      |
| C -0.51425600 -0.86888000 -3.01984600 | C -1.40154400 -0.43909500 -2.78782300 |                                      |
| H 0.34515500 -1.15744000 -2.41023500  | H -1.90025000 0.11723100 -1.98879800  |                                      |
| H -1.40940000 -1.29021000 -2.55841400 | H -0.50120200 0.12006900 -3.05559700  |                                      |
| H -0.39781600 -1.32322300 -4.00397000 | H -2.06752900 -0.44475200 -3.65152400 |                                      |
| H -3.50536100 0.55017800 -1.58362300  | H 2.56222400 -1.61981000 -2.20102200  |                                      |
| C -3.54181100 2.18888400 -0.21387900  | C 3.02201400 -1.94158900 -0.12882300  |                                      |
| C -4.52544500 2.84110300 -0.95372500  | C 4.20970200 -2.61484600 -0.41265100  |                                      |
| C -3.03365900 2.80049300 0.93646800   | C 2.54016800 -1.93173400 1.18316800   |                                      |
| C -4.99656200 4.09107400 -0.55555200  | C 4.91232100 -3.26766900 0.59629900   |                                      |
| H -4.91592800 2.37324000 -1.85047800  | H 4.59339600 -2.61815800 -1.42720000  |                                      |
| C -3.49781900 4.04862400 1.33221200   | C 3.24170400 -2.58427400 2.19193600   |                                      |
| H -2.25830100 2.30878600 1.51186900   | H 1.62917900 -1.40382400 1.43550900   |                                      |
| C -4.48151100 4.69821500 0.58554600   | C 4.42939900 -3.25329200 1.90219300   |                                      |
| H -5.76089500 4.59017600 -1.13942000  | H 5.83476600 -3.78594500 0.36226600   |                                      |
| H -3.09215700 4.51700600 2.22138600   | H 2.85861700 -2.56028900 3.20528200   |                                      |
| H -4.84293100 5.67206000 0.89400300   | H 4.97438000 -3.76101900 2.68932000   |                                      |
| C -3.19463500 -0.25441600 0.42589400  | C 2.62956800 0.34067600 -1.25412400   |                                      |
| C -3.01983400 0.84320700 -0.65023700  | C 2.32778700 -1.17506100 -1.23467900  |                                      |
| N 2.49783300 -1.07237400 -1.13431900  | N -3.07203000 1.03847200 0.10347000   |                                      |
| Si 3.22338000 0.02066600 -2.24856800  | Si -4.50297400 0.29225900 -0.50027800 |                                      |
| Si 2.80792600 -2.77275600 -1.27151300 | Si -3.00207300 2.76900000 0.17193400  |                                      |
| C 2.50827500 1.78150800 -2.09374500   | C -4.25530600 -1.53450800 -0.97780700 |                                      |
| H 1.48989500 1.82556700 -1.70838600   | H -3.33104300 -1.97352700 -0.60559900 |                                      |
| H 3.14410900 2.42629300 -1.47673000   | H -5.08828900 -2.14219000 -0.60979600 |                                      |
| H 2.47844800 2.24671200 -3.08258600   | H -4.24712900 -1.63469600 -2.06561100 |                                      |
| C 3.01309000 -0.49804200 -4.06147600  | C -5.15859300 1.10666900 -2.08527500  |                                      |
| H 3.43265000 0.26257900 -4.72795700   | H -6.03976200 0.56654600 -2.44806400  |                                      |
| H 3.53063900 -1.43809400 -4.26909900  | H -5.44885800 2.15004200 -1.94308600  |                                      |
| H 1.96442900 -0.63590900 -4.32756600  | H -4.40185500 1.07889600 -2.87529500  |                                      |
| C 5.09018300 0.27743000 -2.02280900   | C -5.93676300 0.32952800 0.74391000   |                                      |
| H 5.66100900 -0.63227400 -2.21714300  | H -6.26654500 1.35236700 0.93731800   |                                      |
| H 5.44557600 1.04801500 -2.71606500   | H -6.79712400 -0.23374100 0.36650500  |                                      |
| H 5.33645000 0.60755600 -1.01039100   | H -5.65143900 -0.10131700 1.70857700  |                                      |

|                                       |                                      |  |
|---------------------------------------|--------------------------------------|--|
| C 4.55567900 -3.18372200 -1.88784000  | C -4.63208600 3.61681500 0.63814500  |  |
| H 4.67854100 -4.27142100 -1.91865300  | H -4.47726900 4.70037400 0.67531700  |  |
| H 4.76640500 -2.80288500 -2.88999800  | H -5.44193900 3.42627900 -0.06948200 |  |
| H 5.31637100 -2.78608100 -1.21048300  | H -4.96843000 3.29601300 1.62800500  |  |
| C 2.65541900 -3.69553100 0.36597200   | C -1.76230500 3.33182300 1.47324000  |  |
| H 1.75965800 -3.46154700 0.93983200   | H -0.74645500 2.98570500 1.28559800  |  |
| H 2.65686600 -4.77273200 0.16549900   | H -1.72115100 4.42538600 1.49216100  |  |
| H 3.51098500 -3.48019500 1.00997400   | H -2.03955900 2.98543300 2.47204900  |  |
| C 1.63901300 -3.63228700 -2.50068100  | C -2.45489500 3.50153600 -1.48782700 |  |
| H 1.70063400 -3.17899000 -3.49360100  | H -3.20335000 3.32904900 -2.26559000 |  |
| H 1.90838800 -4.68910500 -2.59978500  | H -2.27970500 4.58014100 -1.41805500 |  |
| H 0.59329300 -3.59126500 -2.18402000  | H -1.52520300 3.03128300 -1.81483000 |  |
| H -3.48394600 0.21231200 1.36670700   | H 1.80620500 1.51532400 2.12788400   |  |
| C -4.21606100 -1.30570200 0.07984300  | C 1.16943300 3.06652000 -2.24373700  |  |
| C -5.39463300 -1.39174900 0.81881500  | H 2.12678500 2.93434400 -2.75927300  |  |
| C -4.01864600 -2.18364500 -0.98889900 | H 0.55064900 2.19300000 -2.45415300  |  |
| C -6.36516500 -2.33854400 0.49793700  | H 0.67768900 3.93690300 -2.67850400  |  |
| H -5.55367800 -0.71316000 1.64971000  | C 0.45818500 0.00069400 -0.40912400  |  |
| C -4.98137600 -3.13272300 -1.30800800 | C 4.00949500 0.77524200 -0.85219600  |  |
| H -3.10100400 -2.13744400 -1.56147200 | C 4.89238600 1.18734200 -1.85189100  |  |
| C -6.15874300 -3.21213900 -0.56474600 | C 4.45235700 0.75073200 0.47295500   |  |
| H -7.27675200 -2.39563100 1.08098800  | C 6.19952000 1.55414400 -1.54255900  |  |
| H -4.81172300 -3.81567300 -2.13194400 | H 4.55274200 1.22188700 -2.88197600  |  |
| H -6.90789200 -3.95490900 -0.81212200 | C 5.75408400 1.12298000 0.78467400   |  |
| H -0.74013000 -2.79967900 -0.65863900 | H 3.78254700 0.43919000 1.26019300   |  |
| C -2.46568300 -1.23787800 3.39390200  | C 6.63278600 1.52219100 -0.22072100  |  |
| H -1.92014400 -0.30577500 3.23840900  | H 6.87254900 1.87094200 -2.33055700  |  |
| H -3.53227900 -1.04718700 3.23530100  | H 6.08260800 1.10169200 1.81689900   |  |
| H -2.33377600 -1.52805000 4.43654400  | H 7.64698500 1.81290700 0.02684100   |  |
| N 2.47526900 1.44158400 1.21403900    | H 2.44302200 0.69713800 -2.27220200  |  |
| Si 1.44749400 2.73145700 1.93467600   | C -1.02803900 -2.84979800 1.76926900 |  |
| Si 3.96722200 0.92957300 2.13085300   | O -1.96708400 -1.84477900 1.31637300 |  |
| C 0.48322100 3.49825900 0.52911700    | C -3.13832800 -2.04423600 2.15102300 |  |
| H 1.13120600 3.90595000 -0.24986600   | C -3.29065500 -3.56771400 2.24162400 |  |
| H -0.16679600 2.75932600 0.06904100   | C -1.87929400 -4.11025600 1.89054900 |  |
| H -0.14965700 4.30875700 0.90180100   | H -0.23683600 -2.91532900 1.03178200 |  |
| C 2.44967900 4.12217000 2.71795900    | H -0.61549300 -2.52064300 2.72630900 |  |
| H 1.75366500 4.88249500 3.08771800    | H -2.93589800 -1.58656300 3.12357900 |  |
| H 3.07285800 3.81198900 3.55685900    | H -3.97110900 -1.53864100 1.67526000 |  |
| H 3.09381500 4.60385800 1.97717400    | H -3.61428200 -3.86664900 3.23932200 |  |
| C 0.25687500 1.99691500 3.17626500    | H -4.03105000 -3.92415100 1.52511900 |  |
| H 0.76444500 1.51762300 4.01322600    | H -1.48588800 -4.78660300 2.65060500 |  |
| H -0.39293500 2.78688100 3.56769600   | H -1.89816300 -4.63996200 0.93693600 |  |
| H -0.36058500 1.22782100 2.70944700   |                                      |  |
| C 3.63435600 0.90743300 3.97506300    | $E_{\text{THF}} = -2796.43755313$    |  |
| H 4.54959200 0.57645100 4.47688400    | Thermal correction = 0.736731        |  |
| H 3.35972400 1.87331700 4.40044200    |                                      |  |

|                                       |  |  |
|---------------------------------------|--|--|
| H 2.84946600 0.18201400 4.19449700    |  |  |
| C 4.57619600 -0.75814100 1.60872200   |  |  |
| H 4.50741500 -0.91117100 0.53290300   |  |  |
| H 5.62359800 -0.86268200 1.91012300   |  |  |
| H 3.99243500 -1.53745700 2.09853300   |  |  |
| C 5.29276300 2.20219800 1.70467500    |  |  |
| H 5.03729700 3.20551100 2.05060400    |  |  |
| H 6.24210900 1.92063100 2.17054400    |  |  |
| H 5.46599400 2.25072900 0.62532700    |  |  |
| H 2.81520600 1.81843100 0.32798800    |  |  |
| C -0.89038500 -0.09302600 -0.14572400 |  |  |
|                                       |  |  |
| $E_{\text{BENZ}} = -3437.85221567$    |  |  |
| Thermal correction= 0.851798          |  |  |

## Ring-Opening Polymerization (ROP) of cyclic monomers.

Polymerization experiments were performed in a glovebox at room temperature: in a 4 mL vial, the complex was weighed and dissolved in the desired solvent. Subsequently, the solution of the initiator in the same solvent was added to the solution of the complex and left to stir for 5 min. Finally, the monomer solution was added to the reaction mixture. The polymerization was stopped using wet dichloromethane, and then the solvent was removed under reduced pressure. The polymer was washed with methanol to remove the non-reacted monomer. Most of the samples were characterized by NMR spectroscopy, MALDI-ToF mass spectrometry and/or GPC analysis both before and after the washing with methanol.

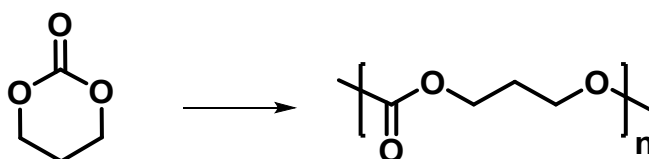

**Scheme S2:** Ring-opening polymerization (ROP) of trimethylene carbonate

**TABLE S3:** ROP of TMC promoted by complex **1a** and **1b**, at 20°C.

| Entry | Cat.      | Cat/TMC/CoCat. | Solvent | Time   | Conv <sup>[b]</sup> (%) | $M_n^{\text{th}}$ [c] | $M_n^{\text{exp}}$ [d] | $\bar{D}$ [d] | Ref                 |
|-------|-----------|----------------|---------|--------|-------------------------|-----------------------|------------------------|---------------|---------------------|
| 1     | <b>1a</b> | 1:30:0         | DCM     | 5.5 h  | 78                      | 2.4                   | 29.5                   | 2.01          | 4                   |
| 2     | <b>1a</b> | 1:30:1         | DCM     | 5.5 h  | 81                      | 2.5                   | 2.8                    | 1.21          | 4                   |
| 3     | <b>1b</b> | 1:100:0        | THF     | 15 min | 75                      | 7.7                   | 25.6                   | 2.87          |                     |
| 4     | <b>1b</b> | 1:100:1        | THF     | 10 min | 95                      | 9.7                   | 9.9                    | 1.76          | Entry 10<br>Table 1 |

General conditions: [Cat] = 8  $\mu\text{mol}$ , CoCat: BnOH (1 equiv). Volume of solvent = 0.8 mL. Temperature: 20 °C. <sup>b</sup> Conversion determined by <sup>1</sup>H NMR ( $\text{CDCl}_3$ ) integrals of TMC ( $\delta = 4.45$  ppm) and PTMC ( $\delta = 4.23$  ppm). <sup>c</sup>  $M_n^{\text{th}}$  ( $\text{g mol}^{-1}$ ) =  $MM_{\text{monomer}} \times ([\text{TMC}]_0/[\text{Cat}]_0) \times \text{monomer conversion}$ . <sup>d</sup> Experimental  $M_n$  (in  $\text{g mol}^{-1}$ ) and  $M_w/M_n$  ( $\bar{D}$ ) values were determined by GPC in THF using polystyrene standards and corrected of factors indicated in the literature for PTMC.

**TABLE S4:** ROP of TMC promoted by complex **1b** in different solvents, at 20°C.

| Entry | Solvent       | Time   | Conv <sup>[b]</sup> (%) | $M_n^{\text{th}}$ [c] | $M_n^{\text{exp}}$ [d] | $\bar{D}$ [d] |
|-------|---------------|--------|-------------------------|-----------------------|------------------------|---------------|
| 1     | THF           | 1 min  | 45                      | 10005                 | 13873                  | 1.71          |
|       |               | 5 min  | 70                      |                       |                        |               |
|       |               | 10 min | 89                      |                       |                        |               |
|       |               | 20 min | 98                      |                       |                        |               |
| 2     | Toluene       | 1 min  | 45                      | 9699                  | 11173                  | 1.08          |
|       |               | 5 min  | 58                      |                       |                        |               |
|       |               | 20 min | 95                      |                       |                        |               |
| 3     | 1,3 dioxolane | 5 min  | 48                      | 9188                  | 11185                  | 1.70          |
|       |               | 20 min | 76                      |                       |                        |               |
|       |               | 35 min | 85                      |                       |                        |               |
|       |               | 45 min | 90                      |                       |                        |               |
| 4     | DCM           | 30 min | 78                      | 8984                  | 5736                   | 1.51          |
|       |               | 1 h    | 88                      |                       |                        |               |



|   |        |     |    |      |      |      |
|---|--------|-----|----|------|------|------|
| 5 | Me-THF | 1 h | 52 | 8984 | 5577 | 1.62 |
|   |        | 2 h | 65 |      |      |      |
|   |        | 4 h | 79 |      |      |      |
|   |        | 9 h | 88 |      |      |      |

General conditions: [**1b**] = 8  $\mu\text{mol}$ , 1 equivalent of BnOH, 100 eq of TMC. Volume of solvent = 0.8 mL <sup>b</sup> Conversion determined by <sup>1</sup>H NMR (CDCl<sub>3</sub>) integrals of TMC ( $\delta$  = 4.45 ppm) and PTMC ( $\delta$  = 4.23 ppm). <sup>c</sup>  $M_n^{\text{th}}$  (g mol<sup>-1</sup>) =  $MM_{\text{monomer}} \times ([\text{monomer}]_0 / [\mathbf{1b}]_0) \times \text{monomer conversion}$ . <sup>d</sup> Experimental  $M_n$  (in g mol<sup>-1</sup>) and  $M_w/M_n$  ( $\bar{D}$ ) values were determined by GPC in THF using polystyrene standards and corrected of 0.73 for PTMC (as indicated in the literature<sup>28</sup> for PTMC with theoretical mass in the range 5000-10000).

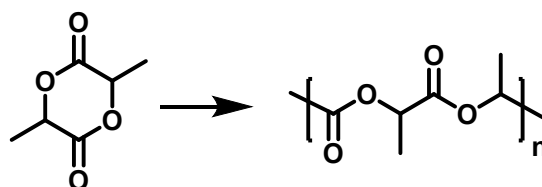

**Scheme S3:** Ring-opening polymerization (ROP) of lactide.

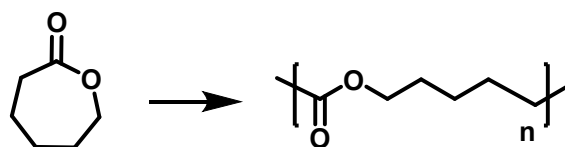

**Scheme S4:** Ring-opening polymerization (ROP) of  $\epsilon$ -caprolactone.

**TABLE S5:** ROP of cyclic esters and carbonates promoted by complexes **1a**, **1b**, **2a** and **2b**.

| Entry | Complex   | Monomer        | Cocat             | Time   | Conv <sup>b</sup> (%) |
|-------|-----------|----------------|-------------------|--------|-----------------------|
| 1     | <b>1a</b> | L-LA           | <sup>i</sup> PrOH | 15 min | 12                    |
|       |           |                |                   | 30 min | 31                    |
|       |           |                |                   | 1 h    | 65                    |
|       |           |                |                   | 2,5 h  | 84                    |
| 2     | <b>1b</b> | L-LA           | <sup>i</sup> PrOH | 30 min | 2                     |
|       |           |                |                   | 2.5 h  | 23                    |
|       |           |                |                   | 4 h    | 40                    |
|       |           |                |                   | 6 h    | 55                    |
| 3     | <b>2a</b> | L-LA           | <sup>i</sup> PrOH | 1 h    | 20                    |
|       |           |                |                   | 2 h    | 37                    |
|       |           |                |                   | 3 h    | 48                    |
|       |           |                |                   | 6 h    | 61                    |
| 4     | <b>2b</b> | L-LA           | <sup>i</sup> PrOH | 1 h    | 10                    |
|       |           |                |                   | 2 h    | 16                    |
|       |           |                |                   | 3 h    | 25                    |
|       |           |                |                   | 6 h    | 49                    |
| 5     | <b>1a</b> | $\epsilon$ -CL | <sup>i</sup> PrOH | 30 min | 8                     |
|       |           |                |                   | 2 h    | 32                    |
|       |           |                |                   | 4 h    | 50                    |
|       |           |                |                   | 6 h    | 66                    |
|       |           |                |                   | 7 h    | 80                    |
| 6     | <b>1b</b> | $\epsilon$ -CL | <sup>i</sup> PrOH | 1 min  | 77                    |
|       |           |                |                   | 5 min  | 84                    |
|       |           |                |                   | 10 min | 95                    |
|       |           |                |                   | 15 min | 99                    |
| 7     | <b>2a</b> | $\epsilon$ -CL | <sup>i</sup> PrOH | 1 h    | 0                     |
|       |           |                |                   | 2 h    | 0                     |

|    |           |                |               |        |    |
|----|-----------|----------------|---------------|--------|----|
|    |           |                |               | 4 h    | 2  |
|    |           |                |               | 9 h    | 7  |
| 8  | <b>2b</b> | $\epsilon$ -CL | <i>i</i> PrOH | 5 min  | 64 |
|    |           |                |               | 15 min | 81 |
|    |           |                |               | 30 min | 99 |
| 9  | <b>1a</b> | TMC            | BnOH          | 15 min | 50 |
|    |           |                |               | 30 min | 77 |
|    |           |                |               | 45 min | 86 |
|    |           |                |               | 1 h    | 92 |
| 10 | <b>1b</b> | TMC            | BnOH          | 1 min  | 71 |
|    |           |                |               | 5 min  | 87 |
|    |           |                |               | 10 min | 95 |
| 11 | <b>2a</b> | TMC            | BnOH          | 1 h    | 46 |
|    |           |                |               | 2 h    | 70 |
|    |           |                |               | 3 h    | 84 |
|    |           |                |               | 5.5 h  | 96 |
| 12 | <b>2b</b> | TMC            | BnOH          | 30 sec | 43 |
|    |           |                |               | 1 min  | 58 |
|    |           |                |               | 5 min  | 83 |
|    |           |                |               | 15 min | 96 |

General conditions: [cat] = 15  $\mu$ mol for cyclic esters, 8  $\mu$ mol for cyclic carbonates, 1 equivalent of alcohol, 100 eq of monomer. <sup>b</sup> Conversion determined by <sup>1</sup>H NMR (CDCl<sub>3</sub>) integrals of LLA ( $\delta$  = 5.08 ppm) and PLLA ( $\delta$  = 5.15 ppm),  $\epsilon$ CL ( $\delta$  = 4.25 ppm) and PCL ( $\delta$  = 4.05 ppm), TMC ( $\delta$  = 4.45 ppm) and PTMC ( $\delta$  = 4.23 ppm).



**TABLE S6:** ROP of LA and TMC by zinc and magnesium complexes supported by NHC-type ligands reported in the literature.

| Cat                                          | Monomer (eq)         | T (°C) | Cocat (eq)        | Solvent | Time (h) | Conv. (%) | $M_n^{\text{th}}$ (kDa) | $M_n^{\text{exp}}$ (kDa) | $\bar{D}$ | Reference    |
|----------------------------------------------|----------------------|--------|-------------------|---------|----------|-----------|-------------------------|--------------------------|-----------|--------------|
| $[\text{Mg}(\text{L})\text{N}^{\text{R}}]_2$ | <i>rac</i> -LA (100) | 25     | -                 | THF     | 0.75     | 98        | 36.3                    | 26.0                     | 1.57      | <sup>5</sup> |
| $[\text{Zn}(\text{L})\text{N}^{\text{R}}]_2$ | <i>rac</i> -LA (100) | 25     | -                 | THF     | 16       | 78        | 32.4                    | 27.5                     | 1.30      | <sup>5</sup> |
| <b>5</b>                                     | <i>rac</i> -LA (100) | 25     | BnOH (1)          | DCM     | 1.5      | 90        | 11.5                    | 13.0                     | 1.11      | <sup>6</sup> |
| <b>5</b>                                     | TMC (100)            | 25     | -                 | DCM     | 1        | 89        | 9.1                     | 10.1                     | 1.14      | <sup>7</sup> |
| <b>1</b>                                     | <i>rac</i> -LA (100) | 25     | BnOH (1)          | toluene | 1        | 98        | -                       | 21.3                     | 1.51      | <sup>8</sup> |
| <b>2a</b>                                    | <i>rac</i> -LA (120) | 25     | <i>i</i> PrOH (2) | DCM     | 18       | 91        | 7.9                     | 4.6                      | 1.48      | <sup>9</sup> |
| <b>3</b>                                     | <i>rac</i> -LA (120) | 25     | -                 | DCM     | 48       | 99        | 17.3                    | 4.0                      | 1.88      | <sup>9</sup> |
| <b>3</b>                                     | <i>rac</i> -LA (120) | 110    | <i>i</i> PrOH (2) | toluene | 1        | 93        | 8.0                     | 3.4                      | 1.53      | <sup>9</sup> |

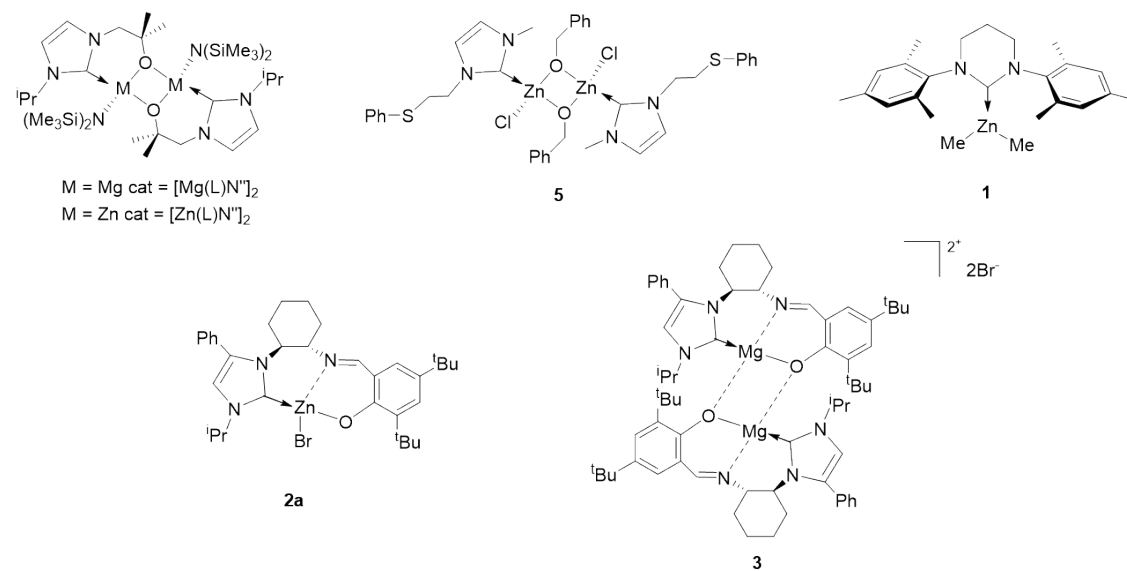

**Scheme S5** NHC-type zinc and magnesium complexes reported in the literature for the ROP of lactide and trimethylene carbonate

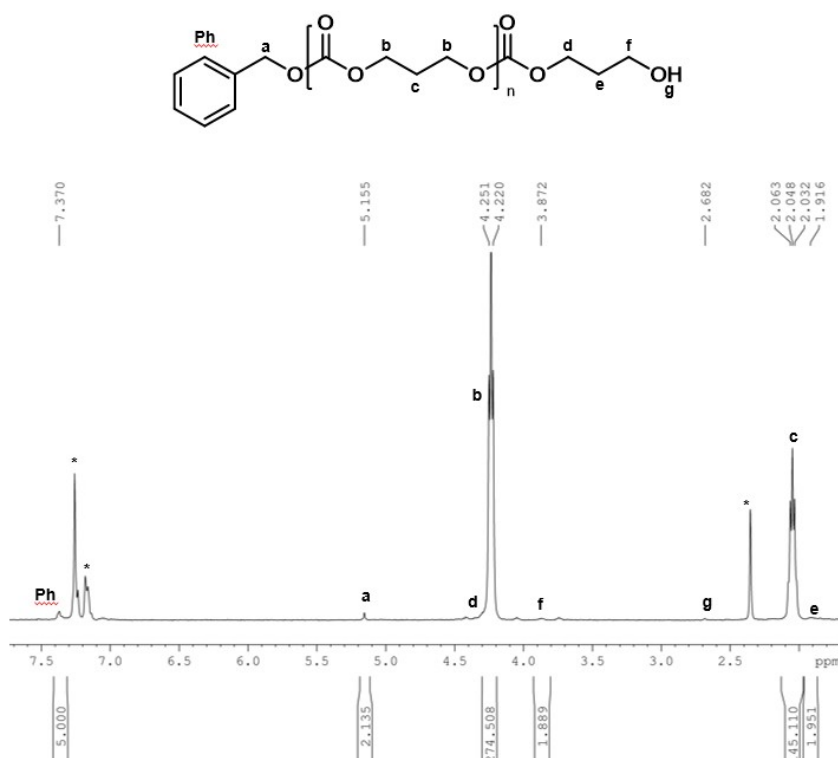

**Figure S17:**  $^1\text{H-NMR}$  spectrum of poly(trimethylene carbonate) (solvent:  $\text{CDCl}_3$ , 400 MHz, 298 K).  
\* = toluene.

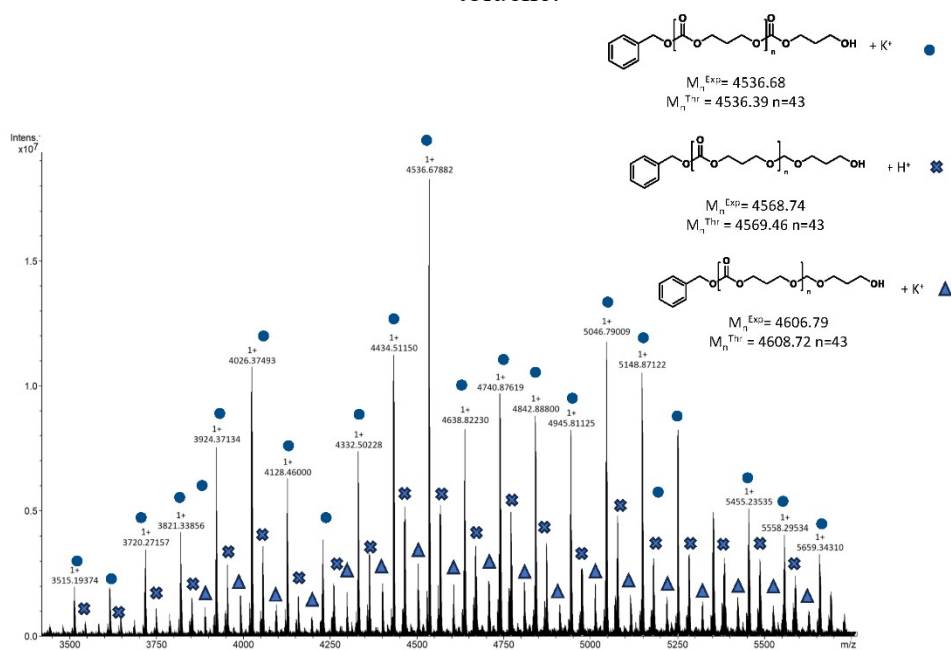

**Figure S18:** MALDI-TOF mass spectrum (matrix DCTB) of the isolated polymer from TMC polymerization. Polymerization conditions:  $[\text{TMC}]_0/[\text{BnOH}]_0/[\mathbf{1b}] = 50:1:1$ , temperature: 25 °C, solvent: THF.

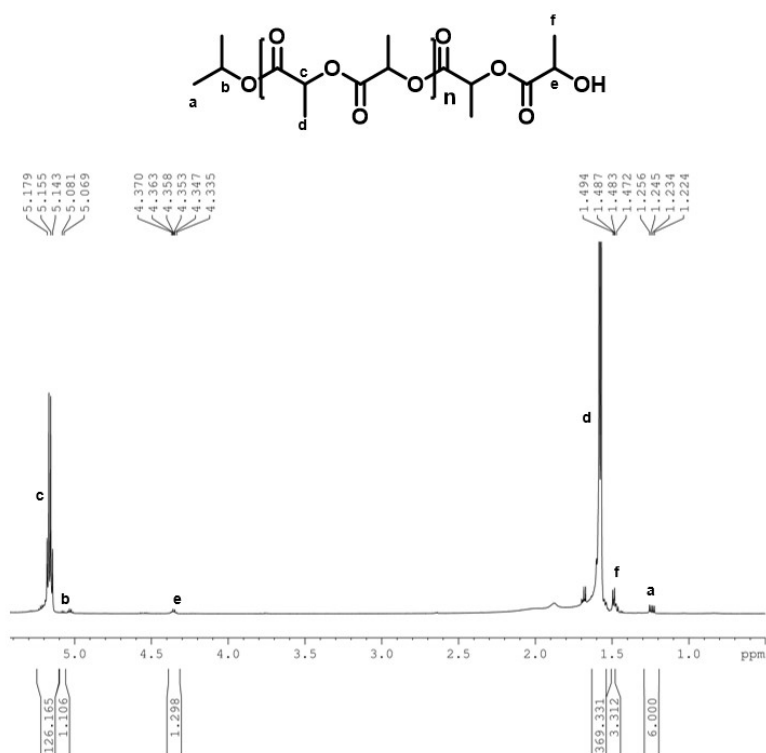

**Figure S19:** <sup>1</sup>H-NMR spectrum of polylactide (solvent: CDCl<sub>3</sub>, 600 MHz, 298 K).

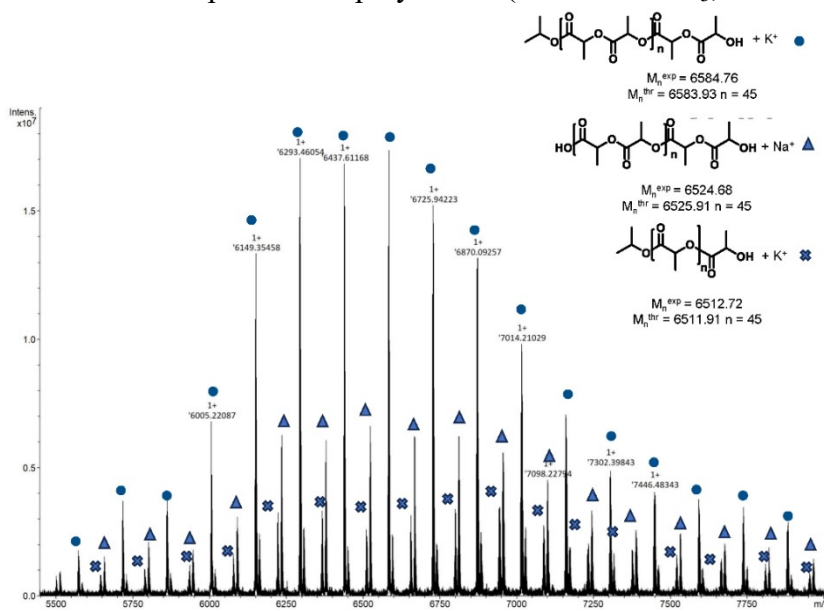

**Figure S20:** MALDI-TOF mass spectrum (matrix: DCTB) of the isolated polymer from L-LA polymerization (entry 2 in Table 1). Polymerization conditions: [LLA]<sub>0</sub>/[iPrOH]<sub>0</sub>/[**1b**] = 100:1:1, temperature: 25 °C, solvent: THF.

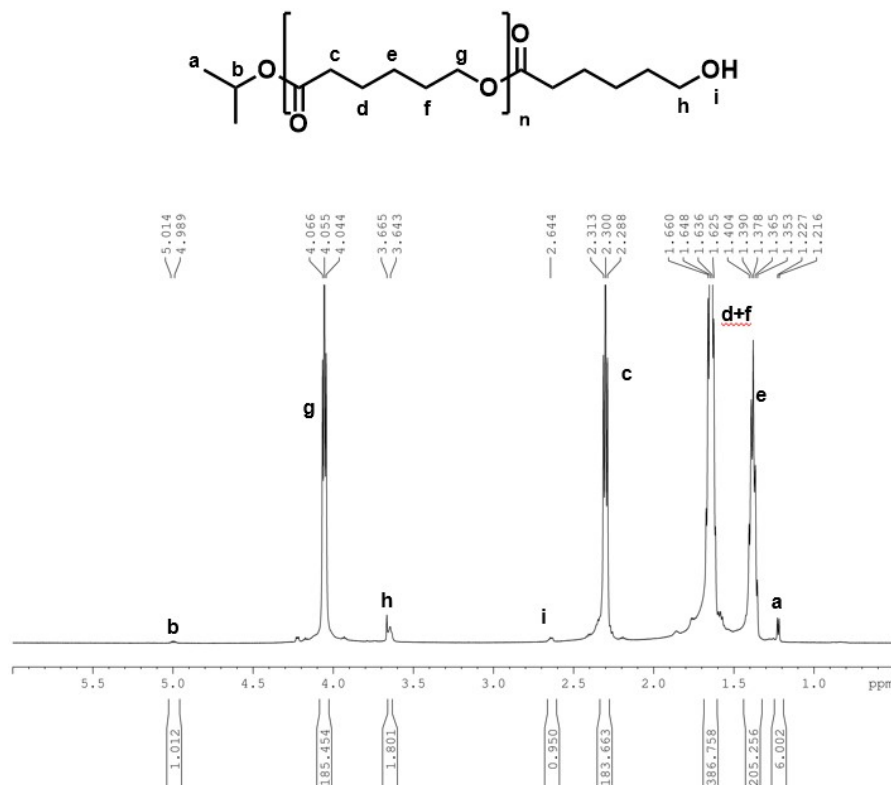

**Figure S21:**  $^1\text{H-NMR}$  spectrum of polycaprolactone (solvent:  $\text{CDCl}_3$ , 400 MHz, 298 K).

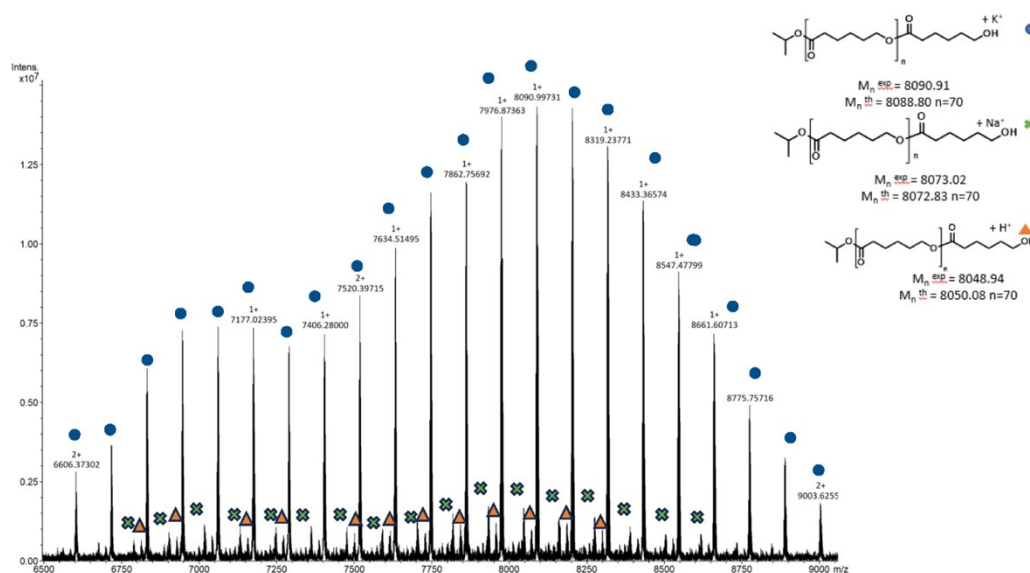

**Figure S22:** MALDI-TOF mass spectrum (matrix: DCTB) of the isolated polymer from  $\epsilon$ -caprolactone polymerization (entry 5 in Table 1). Polymerization conditions:  $[\epsilon\text{-CL}]_0/[\text{iPrOH}]_0/[\mathbf{1a}] = 100:1:1$ , temperature: 25  $^\circ\text{C}$ , solvent: THF.

## Synthesis of alkyl substituted trimethylene carbonates

Following literature procedures<sup>10</sup>, 1-methyl-trimethylene carbonate (1-Me-TMC) and dimethyl-trimethylene carbonate (DTC) were prepared from CO<sub>2</sub> and respectively from 1,3- butanediol and 2,2 dimethyl-1,3 propandiol.

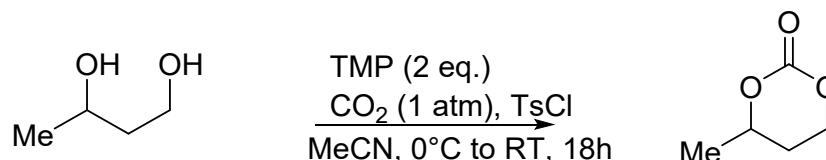

**Scheme S6:** Synthesis of Methyl-Trimethylene Carbonate (Me-TMC).

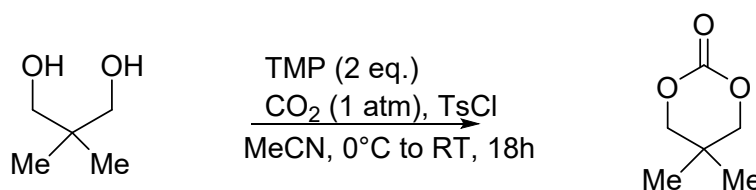

**Scheme S7:** Synthesis of 2,2 Dimethyl-Trimethylene Carbonate (DTC).

A 0.40 mol L<sup>-1</sup> solution of the opportune diol (1.70 mmol) and tosylchloride (TsCl 325 mg, 1.7 mmol, 1 equiv.) in anhydrous acetonitrile (4.3 mL) is prepared in a flask. The atmosphere of the flask is exchanged for CO<sub>2</sub> and the solution saturated with CO<sub>2</sub>. Under a continuous feed of gas, 2,2,6,6 – Tetramethylpiperidine (TMP 575  $\mu$ L, 3.40 mmol, 2 equiv.) is added dropwise at 0 °C, then the reaction is left to reach room temperature under stirring. After approximately 20 minutes, a white precipitate forms and CO<sub>2</sub> stopped being fed to the vessel. After 20 hours, the reaction mixture is diluted with non-anhydrous acetonitrile (10 mL) and the liquid phase separated by centrifugation (3 x 5 minutes at 3000 rpm). The solvent is then removed *in vacuo*. Purification by column chromatography (diameter of column = 1.5 cm, product: silica = 1: 19, 1:1 EtOAc:Hex) affords the cyclic carbonate product (Yield %<sub>Me-TMC</sub> = 70% , Yield %<sub>DTC</sub> = 75%).



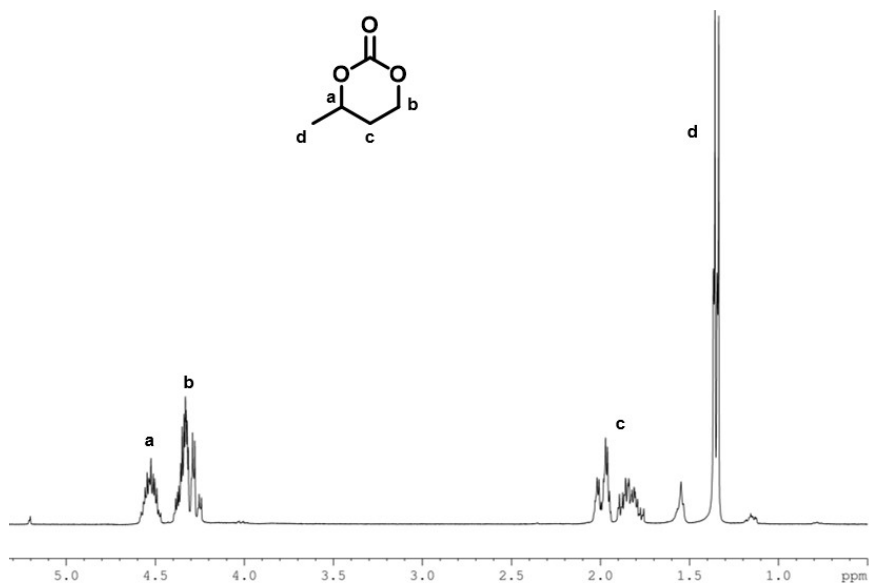

**Figure S23:**  $^1\text{H}$ -NMR spectrum of the methyl-trimethylenecarbonate (solvent:  $\text{CDCl}_3$ , 400 MHz, 298 K).

$^1\text{H}$  NMR (400 MHz,  $\text{CDCl}_3$ , 298 K):  $\delta$  1.35 (d, 3H,  $\text{CH}_3$ ), 1.78-1.88 (m, 1H,  $\text{CH}_2$ ), 2.06-2.00 (m, 1H,  $\text{CH}_2$ ), 4.46-4.21 (m, 2H,  $\text{OCH}_2$ ), 4.68-4.44 (m, 1H, CH).

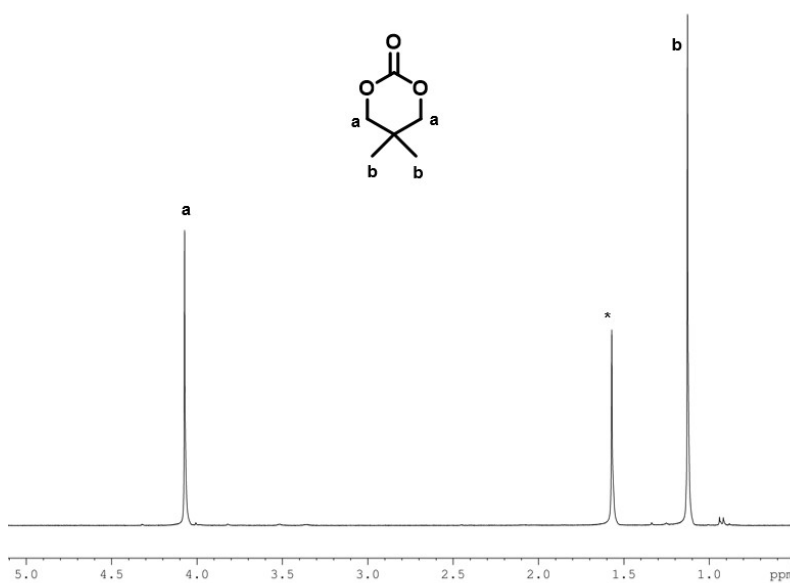

**Figure S24:**  $^1\text{H}$ -NMR spectrum of the 2,2-dimethyl-trimethylenecarbonate (solvent:  $\text{CDCl}_3$ , 300 MHz, 298 K).

$^1\text{H}$  NMR (300 MHz,  $\text{CDCl}_3$ , 298 K):  $\delta$  1.09 (s, 6H,  $\text{CH}_3$ ), 4.04 (s, 4H,  $\text{CH}_2$ ).

## Ring Opening Polymerization (ROP) of alkyl substituted trimethylene carbonates

The polymerization experiments in bulk were carried out in a glove box or in a thermostated bath, at desired temperature. In a typical procedure, the complex ( $8 \times 10^{-6}$  mol) was weighed into a vessel. Subsequently, the initiator was added to the complex and left to stir for a few minutes and the monomer, weighed into a 4 mL vial, was added to the reaction mixture. Conversions have been determined by  $^1\text{H}$  NMR spectroscopy, with the quantities of polymers and monomers determined by integrating the proper resonances (1-MeTMC:  $\delta = 4.65$  ppm; P(MeTMC):  $\delta = 4.90$  ppm; DTC:  $\delta = 4.10$  ppm and P(DTC):  $\delta = 4.01$  ppm). All the polymerization experiments were stopped using wet dichloromethane, after taking the vial out of the glovebox. The solvent was removed under reduced pressure and the polymer was washed with methanol, dried and characterized by NMR spectroscopy, MALDI mass spectrometry and/or GPC analysis.

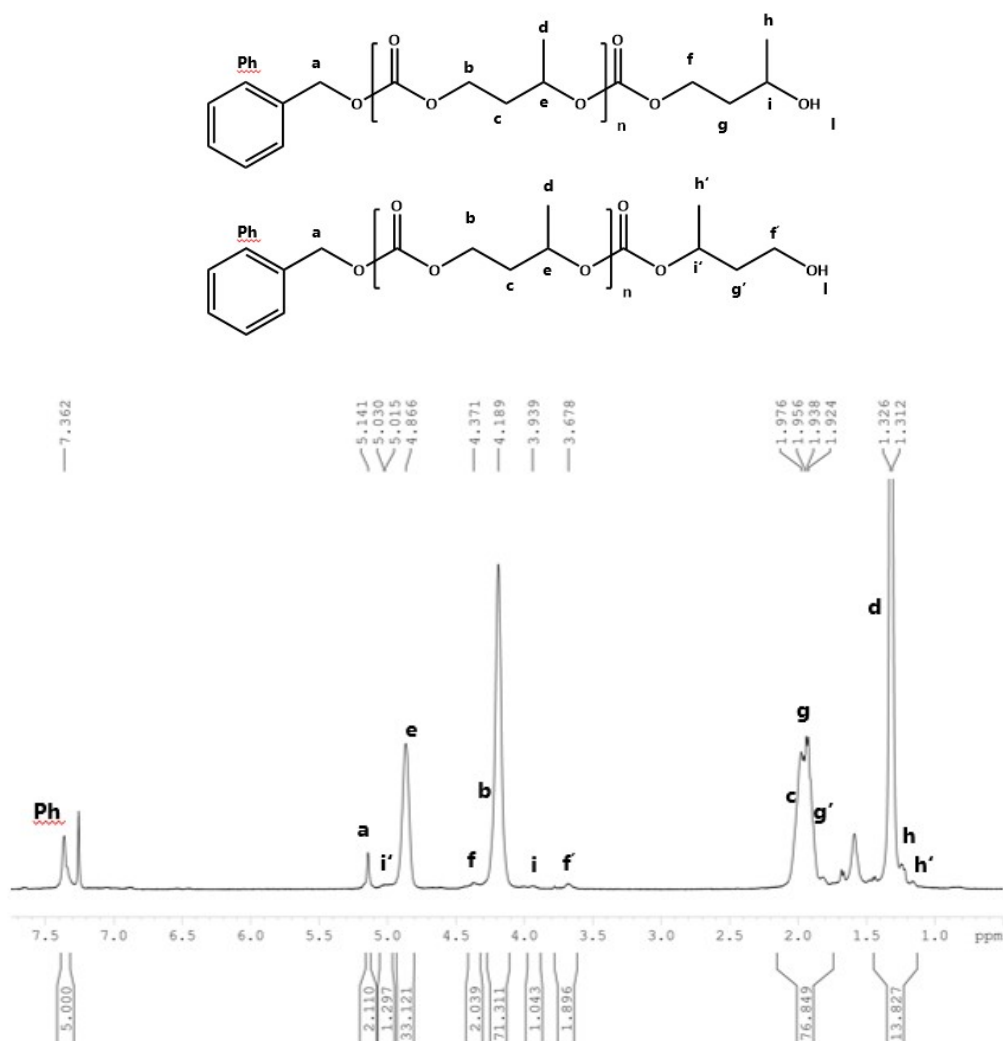

**Figure S25:**  $^1\text{H}$ -NMR spectrum of poly-methyl-trimethylenecarbonate (Solvent:  $\text{CDCl}_3$ , 600 MHz, 298K).

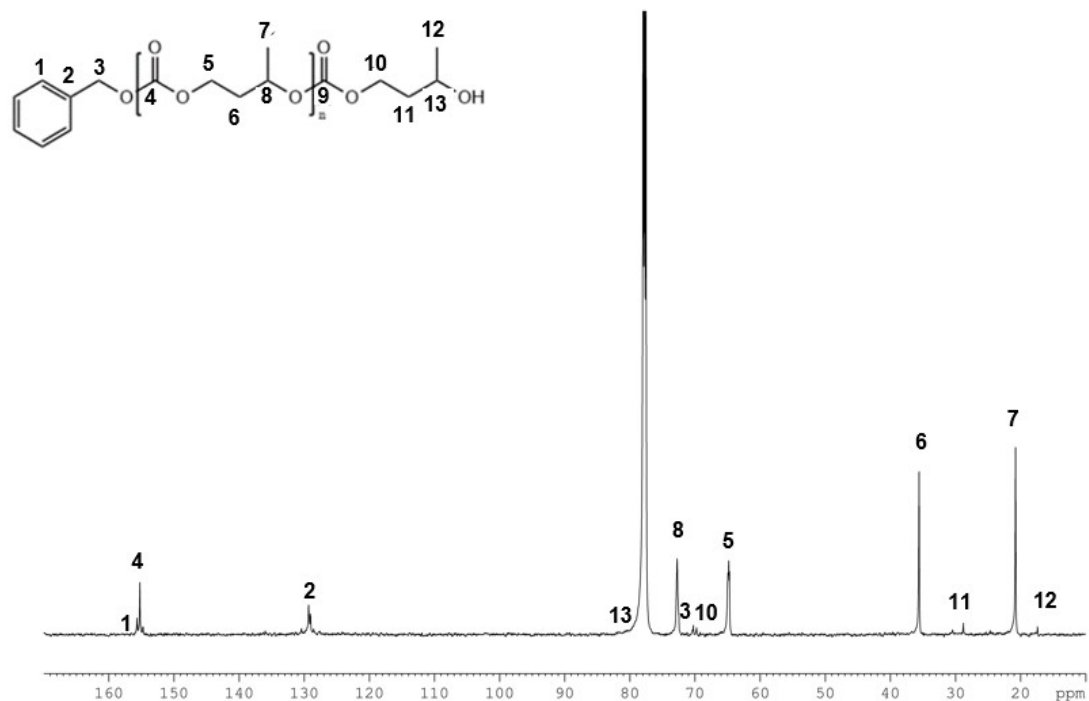

**Figure S26:**  $^{13}\text{C}$ -NMR spectrum of poly-methyl-trimethylenecarbonate (Solvent:  $\text{CDCl}_3$ , 100.6 MHz, 298K).

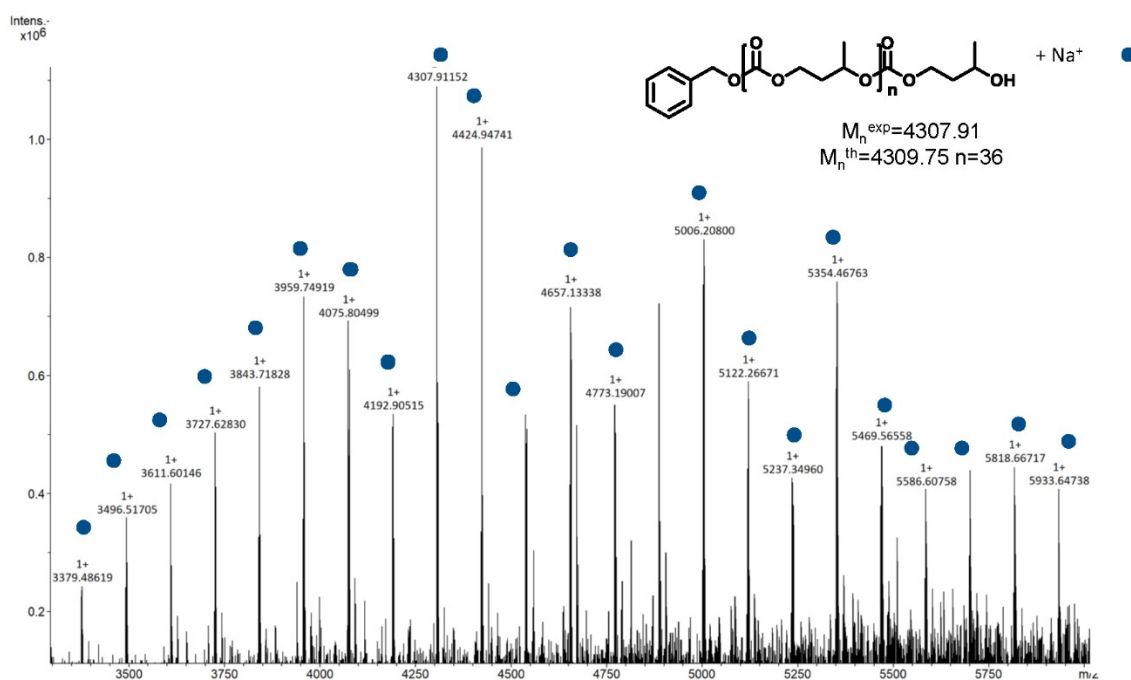

**Figure S27:** MALDI-TOF mass spectrum (matrix: DCTB) of the isolated polymer from 2,2-dimethyl-trimethylene carbonate polymerization (entry 16 in Table 1). Polymerization conditions:  $[\text{Me-TMC}]_0/[\text{BnOH}]_0/[\mathbf{1b}] = 50:1:1$ , temperature: 70 °C.

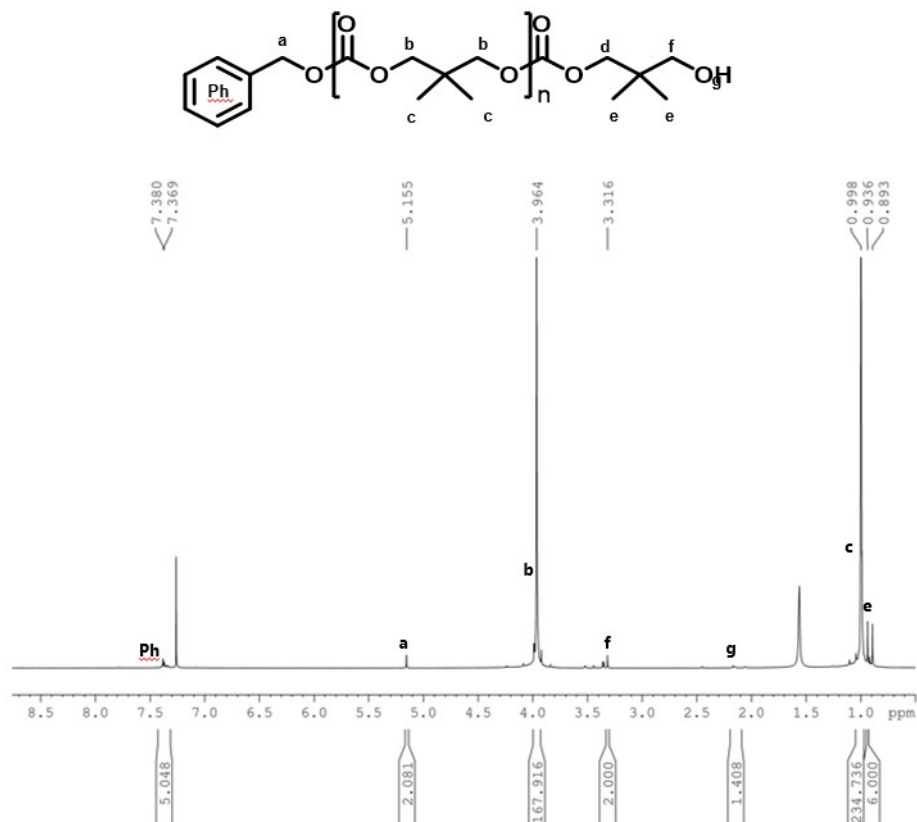

**Figure S28**  $^1\text{H-NMR}$  spectrum of poly-2,2-dimethyl-trimethylenecarbonate (Solvent:  $\text{CDCl}_3$ , 600 MHz, 298 K).

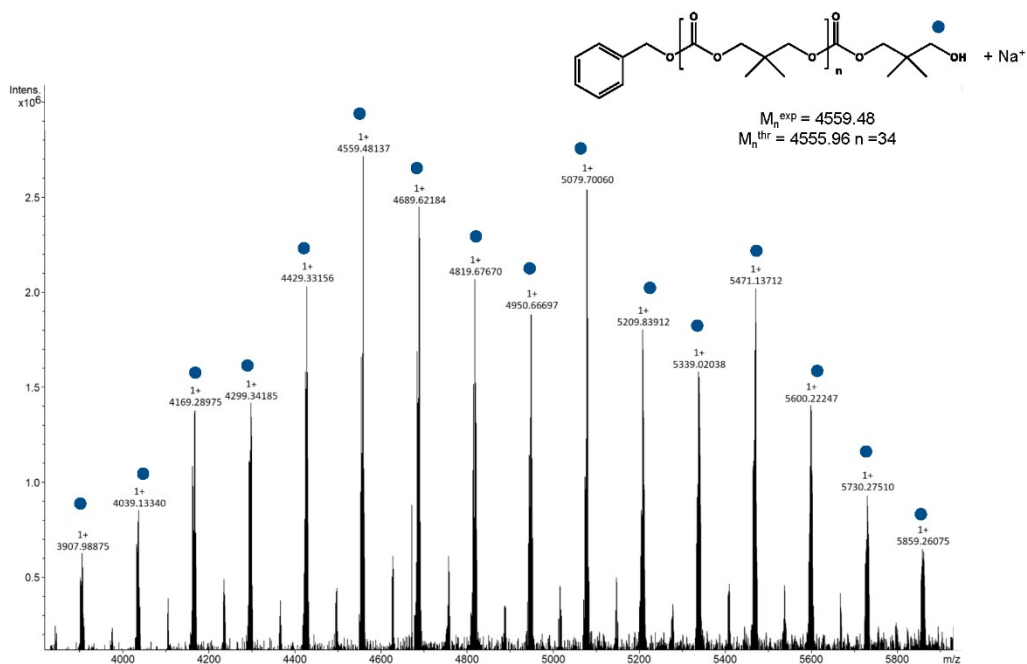

**Figure S29:** MALDI-TOF mass spectrum (matrix: DCTB) of the isolated polymer from 2,2-dimethyl-trimethylene carbonate polymerization (entry 13 in Table 1). Polymerization conditions:  $[\text{DTC}]_0/[\text{BnOH}]_0/[\mathbf{1a}] = 50:1:1$ , temperature: 160  $^\circ\text{C}$ .

## Mechanistic Studies via NMR analysis

A deuterated solution (0.5 mL) of BnOH (1.63 mg,  $1.51 \times 10^{-5}$  mol) was added to a deuterated solution (0.3 mL) of complex (1.51  $\times 10^{-5}$  mol). Once the addition was complete, the reaction mixture was left to stir for a few minutes and transferred to the J-Young tube at room temperature. The formation of the corresponding alcohol adduct was observed.

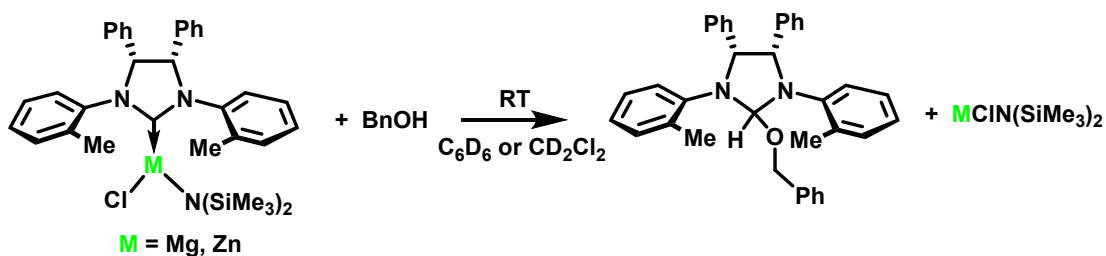

**Scheme S8:** Synthesis of the alcohol adduct L1HOBn from complex **1a** and **1b**.

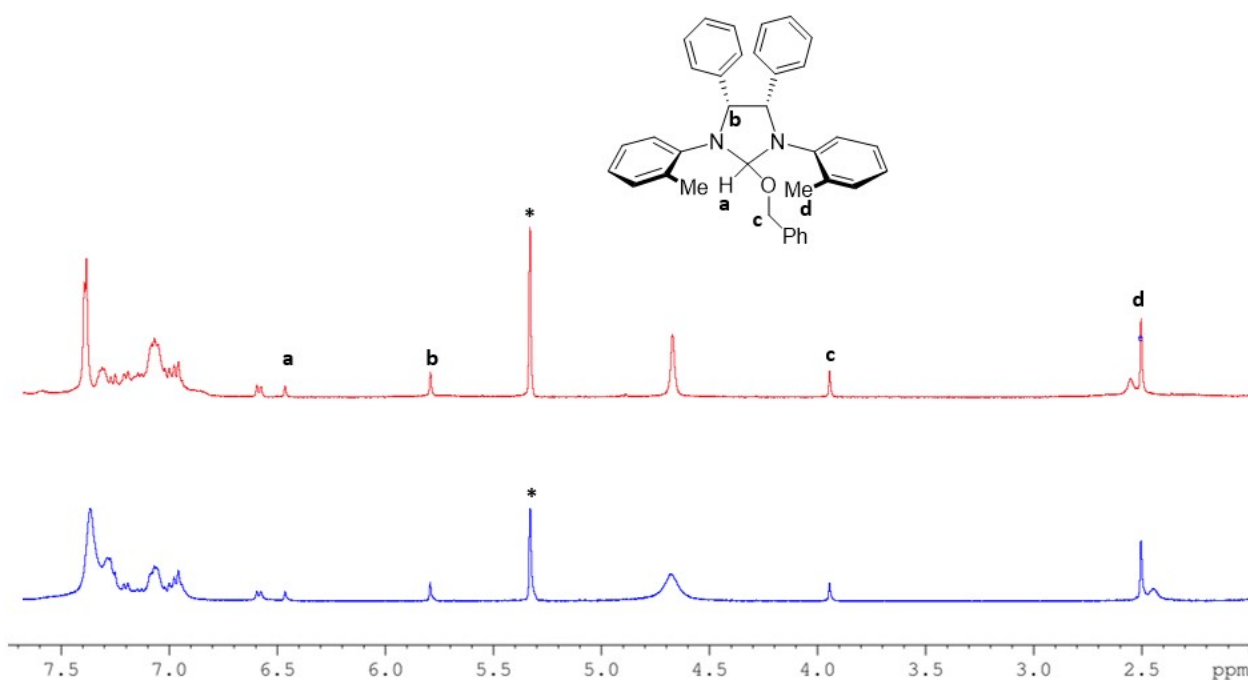

**Figure S30:**  $^1H$  NMR spectra of the products obtained from the reaction of complex **1a** (up spectrum) and complex **1b** (down spectrum) with one equivalent of BnOH in  $CD_2Cl_2$  (400 MHz, 20 °C). \* = benzyl alcohol.

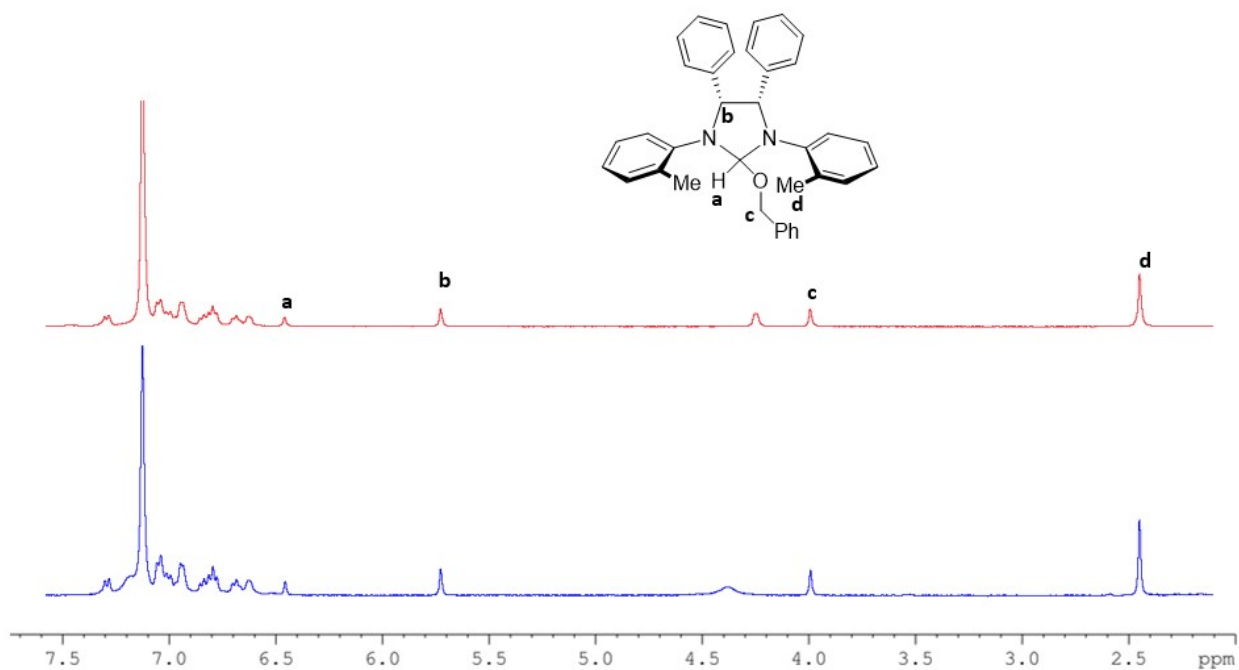

**Figure S31:** <sup>1</sup>H NMR spectra of the products obtained from the reaction of complex **1a** (up spectrum) and complex **1b** (down spectrum) with one equivalent of BnOH in C<sub>6</sub>D<sub>6</sub> (400 MHz, 20 °C).

The experiment was carried out in a glove box. A THF d8 solution of BnOH (1.63 mg,  $1.51 \times 10^{-5}$  mol) was added to a THF d8 solution of complex **1b** ( $1.51 \times 10^{-5}$  mol). The formation of the corresponding alcohol adduct was observed (b). 15 eq of TMC were added to the reaction mixture and the formation of new alcohol adduct was observed (c). After 15 minutes, the addition of BnOH solution led to the formation of the benzyl alcohol adduct (d): subsequently, with the addition of 15 eq of TMC, the formation of alcohol adduct bearing the polymeric chain was observed again (e).

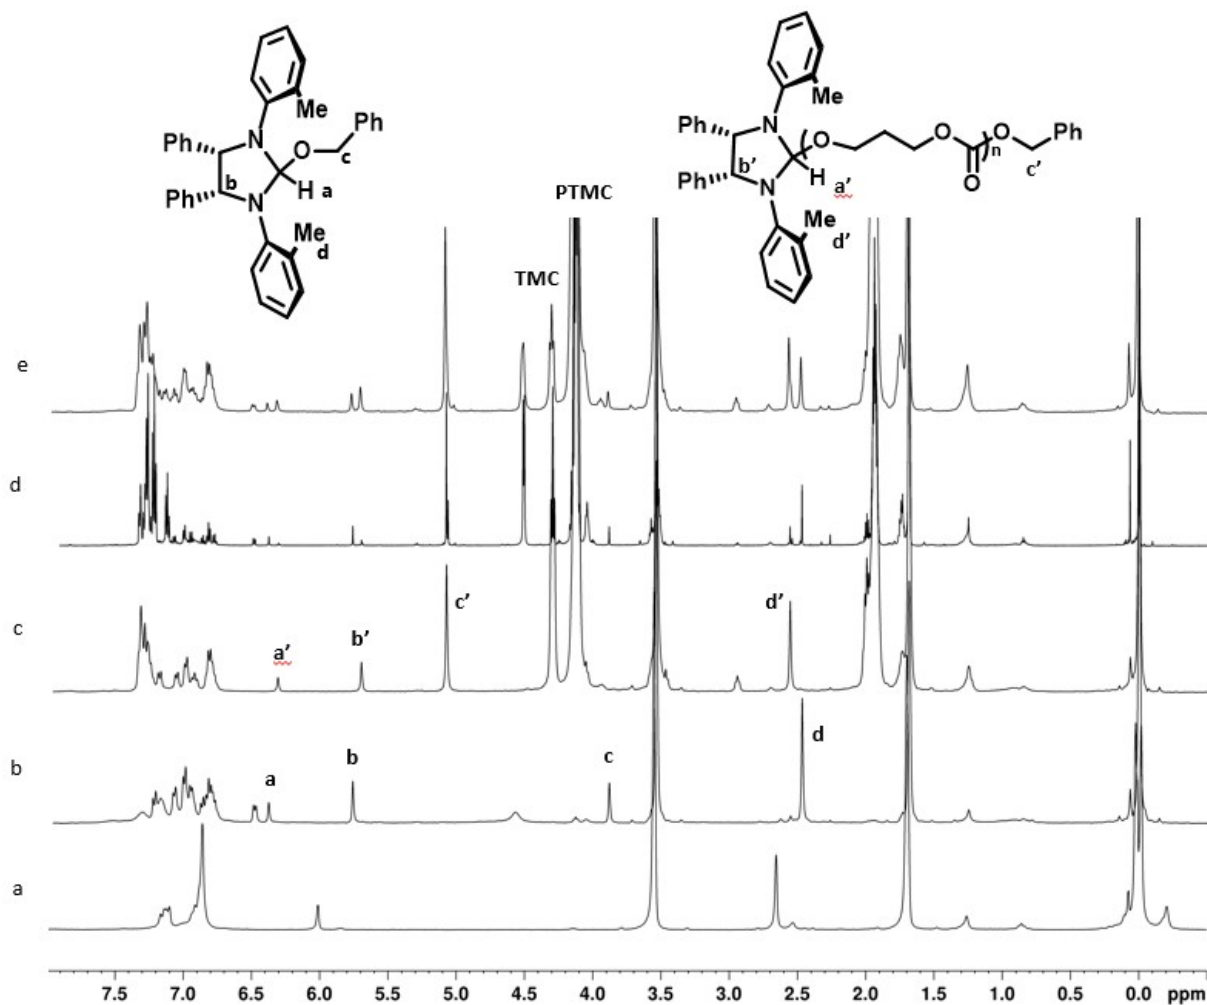

**Figure S32:**  $^1\text{H}$  NMR spectra of the sequential addition of one equivalent of BnOH and 15 eq of TMC to complex **1b** in THF-d8 (400 MHz, 20 °C).

**Table S7.** ROP of LLA and TMC promoted by complex 1a and 1b, alcohol adduct ad itscombination  
with Zn and  
Mg  
precursors in  
THF, 20°C.

| Entry         | Catalytic system                                                                                | Monomer | Time                                    | Conv <sup>b</sup> (%)      | M <sub>n</sub> <sup>th c</sup> (KDa) | M <sub>n</sub> <sup>exp d</sup> (KDa) | Đ <sup>d</sup> | k <sub>obs</sub> (h <sup>-1</sup> ) |
|---------------|-------------------------------------------------------------------------------------------------|---------|-----------------------------------------|----------------------------|--------------------------------------|---------------------------------------|----------------|-------------------------------------|
| 1             | <b>L1HO</b> <sup>Pr</sup>                                                                       | TMC     | 20 min                                  | -                          |                                      |                                       |                |                                     |
| 2             | <b>1a</b><br>+ <sup>i</sup> PrOH                                                                | TMC     | 30 min<br>2.5 h<br>5 h                  | 16<br>58<br>85             | 8.7                                  | 7.5                                   | 1.28           | 0.34                                |
| 3             | <b>L1HO</b> <sup>Pr</sup><br>+ 0.5 ZnCl <sub>2</sub><br>+ 0.5 Zn(NR <sub>2</sub> ) <sub>2</sub> | TMC     | 15 min<br>30 min<br>1 h<br>2 h<br>2.5 h | 12<br>37<br>57<br>79<br>85 | 8.7                                  | 8.8                                   | 1.45           | 0.79                                |
| 4             | <b>L1HO</b> <sup>Pr</sup><br>+ Zn(NR <sub>2</sub> ) <sub>2</sub>                                | TMC     | 15 min                                  | 78                         | 8.0                                  | 19.2                                  | 2.34           |                                     |
| 5             | <b>1b</b><br>+ <sup>i</sup> PrOH                                                                | TMC     | 1 min<br>5 min<br>10 min<br>15 min      | 34<br>75<br>83<br>92       | 9.4                                  | 12.6                                  | 2.2            | 13.0                                |
| 6             | <b>L1HO</b> <sup>Pr</sup><br>+ 0.5 MgCl <sub>2</sub><br>+ 0.5 Mg(NR <sub>2</sub> ) <sub>2</sub> | TMC     | 5 min<br>10 min<br>15 min<br>20 min     | 45<br>60<br>85<br>90       | 9.2                                  | 7.4                                   | 2.1            | 7.1                                 |
| 7             | <b>L1HO</b> <sup>Pr</sup><br>+ Mg(NR <sub>2</sub> ) <sub>2</sub>                                | TMC     | 15 min                                  | 94                         | 9.6                                  | 33.3                                  | 1.85           |                                     |
| 8             | Mg(NR <sub>2</sub> ) <sub>2</sub>                                                               | TMC     | 15 min                                  | 99                         | 10.1                                 | 24.4                                  | 2.27           |                                     |
| 9             | <b>L1HO</b> <sup>Pr</sup>                                                                       | LLA     | 20 min                                  | -                          |                                      |                                       |                |                                     |
| 10<br>Table 1 | <b>1a</b><br>+ <sup>i</sup> PrOH                                                                | LLA     | 15 min<br>30 min<br>1 h<br>2.5 h        | 12<br>31<br>65<br>84       | 12.1                                 | 8.5                                   | 1.27           | 0.80                                |
| 11            | <b>L1HO</b> <sup>Pr</sup><br>+ 0.5 ZnCl <sub>2</sub><br>+ 0.5 Zn(NR <sub>2</sub> ) <sub>2</sub> | LLA     | 15 min<br>30 min<br>45 min<br>1 h       | 39<br>58<br>70<br>80       | 11.5                                 |                                       |                | 1.6                                 |
| 12            | <b>L1HO</b> <sup>Pr</sup><br>+ Zn(NR <sub>2</sub> ) <sub>2</sub>                                | LLA     | 15 min                                  | 39                         | 5.6                                  | 14.7                                  | 1.83           |                                     |
| 13<br>Table 1 | <b>1b</b><br>+ <sup>i</sup> PrOH                                                                | LLA     | 30 min<br>2.5 h<br>4 h<br>6 h           | 3<br>23<br>40<br>55        | 7.9                                  | 6.0                                   | 1.22           | 0.14                                |
| 14            | <b>L1HO</b> <sup>Pr</sup><br>+ 0.5 MgCl <sub>2</sub><br>+ 0.5 Mg(NR <sub>2</sub> ) <sub>2</sub> | LLA     | 30 min<br>2 h<br>4 h<br>6 h<br>8 h      | 6<br>20<br>37<br>54<br>75  | 10.8                                 | 8.1                                   | 1.35           | 0.13                                |
| 15            | <b>L1HO</b> <sup>Pr</sup><br>+ Mg(NR <sub>2</sub> ) <sub>2</sub>                                | LLA     | 15 min                                  | 93                         | 13.4                                 | 16.4                                  | 3.04           |                                     |
| 16            | Mg(NR <sub>2</sub> ) <sub>2</sub>                                                               | LLA     | 15 min                                  | 77                         | 11.1                                 | 24.4                                  | 2.27           |                                     |

General conditions: [cat] = 15 μmol for LLA, 8 μmol for TMC, 100 eq of monomer. <sup>b</sup> Conversion determined by <sup>1</sup>H NMR (CDCl<sub>3</sub>) integrals of LLA (δ = 5.08 ppm) and PLLA (δ = 5.15 ppm), TMC (δ = 4.45 ppm) and PTMC (δ = 4.23 ppm). <sup>c</sup> M<sub>n</sub><sup>th</sup> (g mol<sup>-1</sup>) = MMmonomer × ([monomer]<sub>0</sub>/[cat]<sub>0</sub>) × monomer conversion. <sup>d</sup> Experimental M<sub>n</sub> (in g mol<sup>-1</sup>) and M<sub>w</sub>/M<sub>n</sub> (Đ) values were determined by GPC in THF using polystyrene standards and corrected of 0.73 for PTMC (as indicated in the literature<sup>28</sup> for PTMC with theoretical mass in the range 5000-10000) and of 0.56 for PLLA.



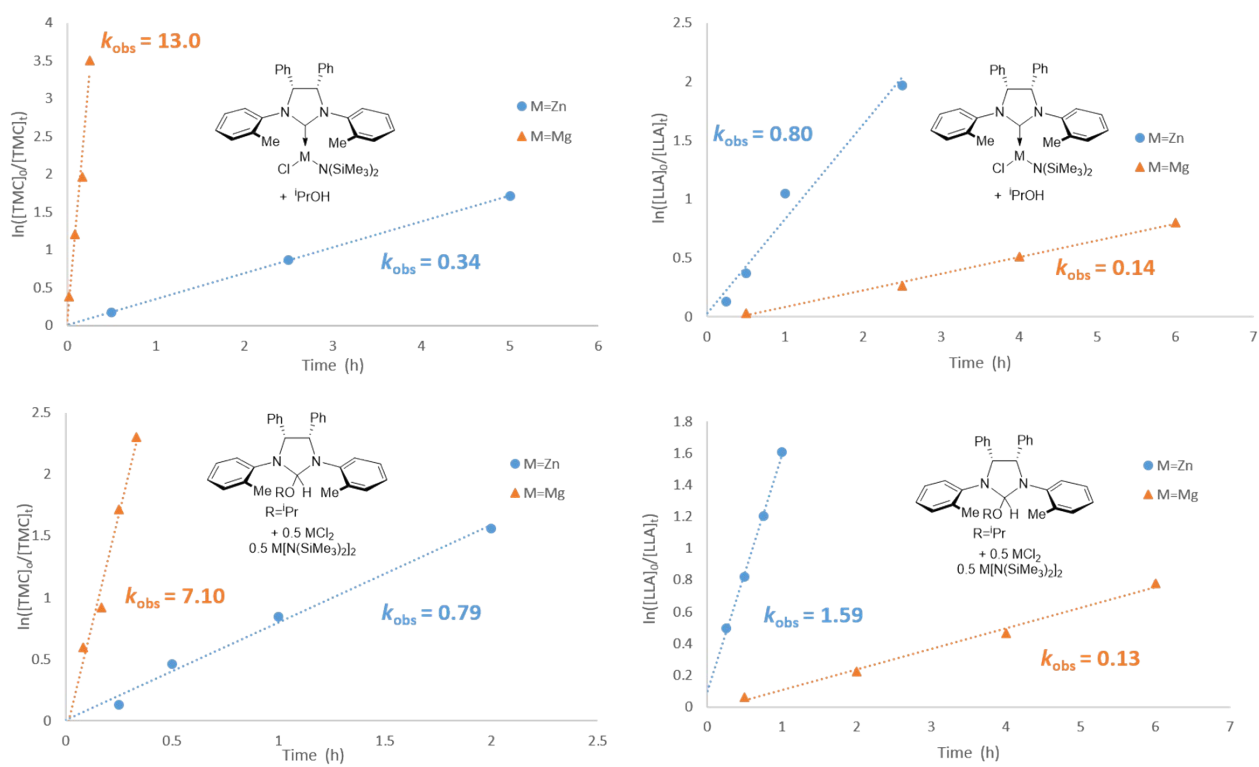

**Figure S33.** First-order kinetic plots for the consumption of TMC (left) and L-LA (right) by the catalytic systems depicted in the insets.

## Chemical recycling of PLLA

### Methanolysis reaction performed in DCM solution

Methanolysis experiments were performed in a glovebox at room temperature: in a 4 mL vial, the complex ( $14.0 \times 10^{-6}$  mol) was weighed and dissolved in 0.4 mL of DCM. The polymer (200 mg,  $2.8 \times 10^{-3}$  mol) was weighted into another vial and then dissolved in 1 mL of DCM. The solution of the complex was added to the solution of the polymer and left to stir for 5 min. After this time, methanol (56.3  $\mu$ L, 1.4 mmol) was added and the reaction mixture was stirred at room temperature for 24 h. The reaction was stopped using wet dichloromethane, and an aliquot of the reaction mixture was dissolved in wet  $CD_2Cl_2$  and analyzed by  $^1H$  NMR spectroscopy.

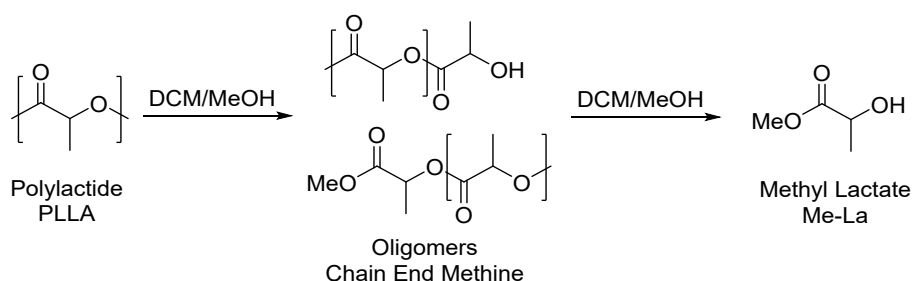

**Scheme S9:** Methanolysis reaction of PLLA in DCM solution.

The conversion of internal methine units ( $X_{Int}$ ), Selectivity ( $S_{Me-La}$ ) and Yield ( $Y_{Me-La}$ ) of methyl lactate were calculated by the following equations<sup>11</sup>:

$$\text{Conversion } X_{int} = \frac{Int_0 - Int}{Int_0}$$

$$\text{Selectivity } S_{MeLa} = \frac{MeLa}{Int_0 - Int}$$

$$\text{Yield } Y_{MeLa} = S_{MeLa} X_{Int}$$

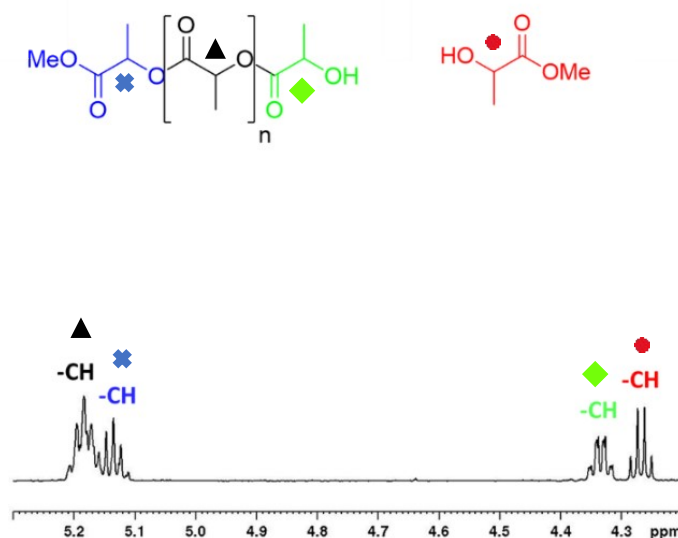

**Figure 34:**  $^1\text{H}$  NMR spectrum of PLA methanolysis with assignment of internal (black triangle), chain end (blue cross and green diamond), and methyl lactate (red circle) alkyl protons. (Solvent =  $\text{CD}_2\text{Cl}_2$ , 400 MHz, 298 K).

### Methanolysis reaction performed in solvent-free conditions

Methanolysis experiments were performed in a glovebox at room temperature: in a 4 mL vial, the complex ( $10.0 \times 10^{-6}$  mol) was weighed then the polymer and 1 mL of methanol were added. The reaction mixture was left to stir for the desired time then stopped using wet dichloromethane. An aliquot of the reaction mixture was dissolved in wet  $\text{CD}_2\text{Cl}_2$  and analyzed by  $^1\text{H}$  NMR spectroscopy.

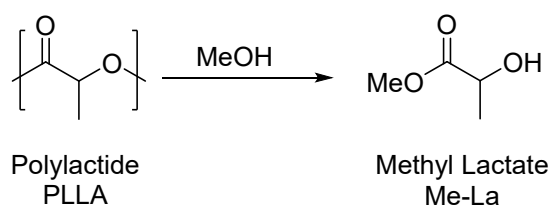

**Scheme S10:** Methanolysis reaction of PLLA in solvent-free conditions.

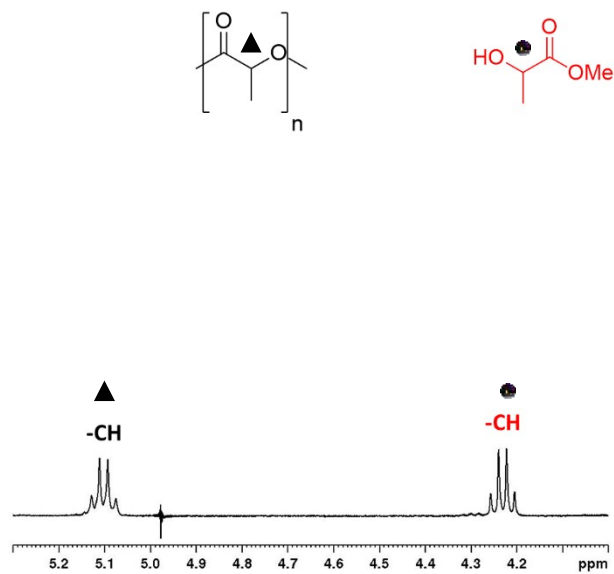

**Figure 35:** <sup>1</sup>H NMR spectrum of PLA methanolysis with assignment of internal (black triangle), and methyl lactate (red circle) alkyl protons. (Solvent = CD<sub>2</sub>Cl<sub>2</sub>, 400 MHz, 298 K).

## Synthesis of the alcoholic adduct L<sub>1</sub>HO<sup>i</sup>Pr

The adduct (L<sub>1</sub>HO<sup>i</sup>Pr) was prepared from the corresponding imidazolium salt by deprotonation with potassium hydride and subsequent reaction with isopropanol. The product was characterized by NMR analysis. The <sup>1</sup>H-NMR spectrum of L<sub>1</sub>HO<sup>i</sup>Pr showed a pattern in agreement with the formation of the desired product and attributable to the presence of a symmetrical species in solution.

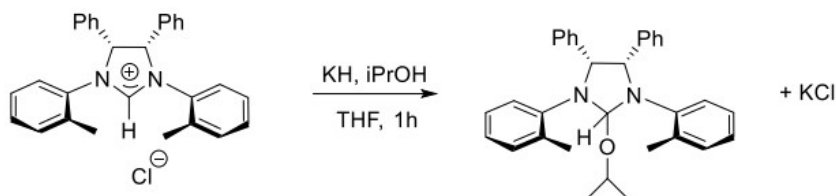

**Scheme S11:** Synthesis of the alcohol adduct L<sub>1</sub>HO<sup>i</sup>Pr.

The reaction was carried out in the glove-box in a nitrogen atmosphere. A THF suspension (1.25 mL) of KH (0.0238 g, 5.93 x 10<sup>-4</sup> mol) was added to a THF suspension (4.4 mL) of the L<sub>1</sub>HCl salt (0.200 g, 4.55 x 10<sup>-4</sup> mol). Once the addition was complete, the reaction mixture was left to stir for 5 minutes at room temperature. Subsequently, a solution of <sup>i</sup>PrOH (0.0251 g, 4.2 x 10<sup>-4</sup> mol) in THF (1.0 mL) was added and the reaction mixture was left under stirring for 1 hour. Then, the reaction mixture was filtered to remove residual salts and the solvent removed under vacuum. The product was obtained as a white powdery solid.

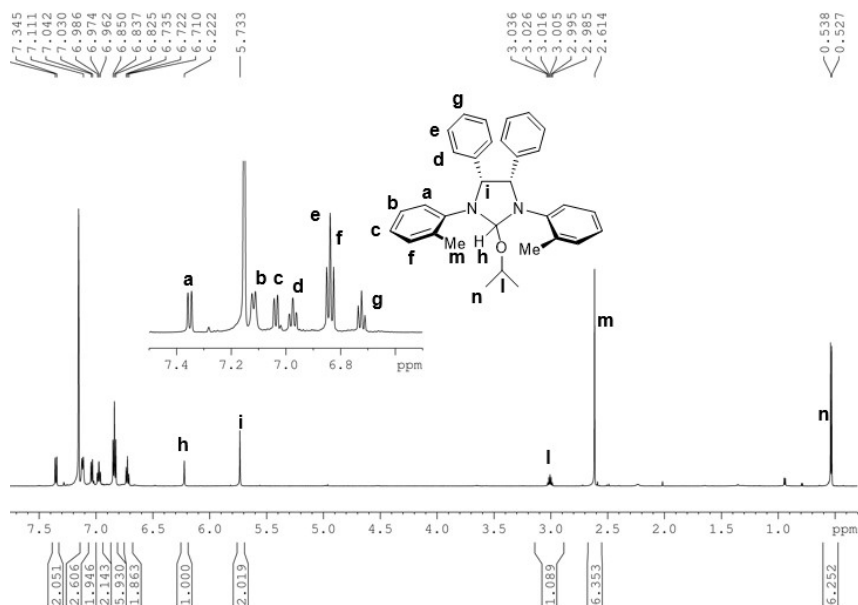

**Figure 36:** <sup>1</sup>H NMR spectra of the alcohol adduct L<sub>1</sub>HO<sup>i</sup>Pr. (Solvent = C<sub>6</sub>D<sub>6</sub>, 400 MHz, 298 K).

$^1\text{H}$  NMR (400 MHz,  $\text{C}_6\text{D}_6$ , 298 K):  $\delta$  0.53 (d, 6H,  $\text{CH}_3$ ), 2.61 (s, 6H,  $\text{CH}_3$ ), 3.00 (m, H, CH), 5.73 (s, 2H, CH), 6.22 (s, H, CH), 6.72 (t, 2H, Ar-H), 6.83 (t, 6H, Ar-H), 6.97 (t, 2H, Ar-H), 7.02 (t, 2H, Ar-H), 7.13 (t, 2H, Ar-H), 7.35 (d, 2H, Ar-H).

## References

- (1) Tufano, F.; Santulli, F.; Grisi, F.; Lamberti, M. N-Heterocyclic Carbene-Based Zinc Complexes: Same Precursors for Different Lactide Ring-Opening Polymerization Mechanisms. *ChemCatChem* **2022**, *14* (20), e202200962. <https://doi.org/10.1002/cctc.202200962>.
- (2) Perfetto, A.; Costabile, C.; Longo, P.; Bertolasi, V.; Grisi, F. Probing the Relevance of NHC Ligand Conformations in the Ru-Catalysed Ring-Closing Metathesis Reaction. *Chemistry – A European Journal* **2013**, *19* (32), 10492–10496. <https://doi.org/10.1002/chem.201301540>.
- (3) Seiders, T. J.; Ward, D. W.; Grubbs, R. H. Enantioselective Ruthenium-Catalyzed Ring-Closing Metathesis. *Org. Lett.* **2001**, *3* (20), 3225–3228. <https://doi.org/10.1021/ol0165692>.
- (4) Tufano, F.; Napolitano, C.; Mazzeo, M.; Grisi, F.; Lamberti, M. CO<sub>2</sub>-Based Polycarbonates through Ring-Opening Polymerization of Cyclic Carbonates Promoted by a NHC-Based Zinc Complex. *Biomacromolecules* **2024**. <https://doi.org/10.1021/acs.biomac.4c00532>.
- (5) Arnold, P. L.; Casely, I. J.; Turner, Z. R.; Bellabarba, R.; Tooze, R. B. Magnesium and Zinc Complexes of Functionalised, Saturated N-Heterocyclic Carbene Ligands: Carbene Lability and Functionalisation, and Lactide Polymerisation Catalysis. *Dalton Trans.* **2009**, No. 35, 7236. <https://doi.org/10.1039/b907034f>.
- (6) Fliedel, C.; Vila-Viçosa, D.; Calhorda, M. J.; Dagherne, S.; Avilés, T. Dinuclear Zinc–N-Heterocyclic Carbene Complexes for Either the Controlled Ring-Opening Polymerization of Lactide or the Controlled Degradation of Poly(lactide) Under Mild Conditions. *ChemCatChem* **2014**, *6* (5), 1357–1367. <https://doi.org/10.1002/cctc.201301015>.
- (7) Fliedel, C.; Mameri, S.; Dagherne, S.; Avilés, T. Controlled Ring-Opening Polymerization of Trimethylene Carbonate and Access to PTMC-PLA Block Copolymers Mediated by Well-Defined N-Heterocyclic Carbene Zinc Alkoxides. *Applied Organometallic Chemistry* **2014**, *28* (7), 504–511. <https://doi.org/10.1002/aoc.3154>.
- (8) Lactide Polymerisation by Ring-Expanded NHC Complexes of Zinc.
- (9) Ferrentino, N.; Franco, F.; Grisi, F.; Pragliola, S.; Mazzeo, M.; Costabile, C. Ring Opening Polymerization of Lactide Promoted by Zinc and Magnesium Complexes with a N-Heterocyclic Carbene-Phenoxy-Imine Hybrid Non-Innocent Ligand. *Molecular Catalysis* **2022**, *533*, 112799. <https://doi.org/10.1016/j.mcat.2022.112799>.
- (10) McGuire, T. M.; López-Vidal, E. M.; Gregory, G. L.; Buchard, A. Synthesis of 5- to 8-Membered Cyclic Carbonates from Diols and CO<sub>2</sub>: A One-Step, Atmospheric Pressure and Ambient Temperature Procedure. *Journal of CO<sub>2</sub> Utilization* **2018**, *27*, 283–288. <https://doi.org/10.1016/j.jcou.2018.08.009>.
- (11) Santulli, F.; Lamberti, M.; Mazzeo, M. A Single Catalyst for Promoting Reverse Processes: Synthesis and Chemical Degradation of Poly(lactide). *ChemSusChem* **2021**, *14* (24), 5470–5475. <https://doi.org/10.1002/cssc.202101518>.
